# Supplementary material for: A general access to organogold(iii) complexes by oxidative addition of diazonium salts
Source: Royal Society of Chemistry journal article supplement (doi:10.1039/c6cc02199a), 2016-01-01

**General Information:** Chemicals were purchased from commercial suppliers and used as delivered. Dry solvents were dispensed from solvent purification system MB SPS-800. Oxygen-free, anhydrous reactions were carried out under an atmosphere of nitrogen. Reaction steps involving the synthesis of phosphorous ligands were carried out using dry and degassed solvents. To degas the solvents, nitrogen was bubbled through them for at least 1 hour. NMR spectra were, if not mentioned otherwise, recorded at room temperature on the following spectrometers: Bruker ARX-250, Bruker Avance DRX-300 or Bruker Avance 500. Chemical shifts are given in ppm and coupling constants in Hz.  $^1\text{H}$  and  $^{13}\text{C}$  spectra were calibrated in relation to deuterated solvents ( $\text{CDCl}_3$ : 7.26 / 77 ppm;  $\text{CD}_2\text{Cl}_2$ : 5.30 / 53.80 ppm;  $\text{C}_6\text{D}_6$ : 7.15 / 128.06 ppm;  $\text{d}_6$ -DMSO: 2.50 / 39.52 ppm;  $\text{d}_6$ -acetone: 2.05 / 29.84;  $\text{d}_4$ -methanol: 3.31 / 49 ppm;  $\text{d}_3$ -acetonitrile: 1.94 / 1.32 ppm).  $^{31}\text{P}$  spectra were calibrated in relation to the reference measurement of phosphoric acid (0.00 ppm).  $^{19}\text{F}$  spectra were calibrated in relation to the reference measurement of 1,2-difluorobenzene (-139 ppm). The following abbreviations were used for  $^1\text{H}$  NMR to indicate the signal multiplicity: s (singlet), d (doublet), t (triplet), q (quartet), quint (quintet), pent (pentet), sext (sextet), sept (septet), decet (decet), m (multiplet), dd (doublet of doublet), dt (doublet of triplet), td (triplet of doublet), qd (quartet of doublet), tt (triplet of triplet), ddd (doublet of doublet of doublet), ddt (doublet of doublet of triplet), bs (broad singlet). All  $^{13}\text{C}$  NMR spectra were measured with  $^1\text{H}$  decoupling. The multiplicities mentioned in this spectra [s (singlet, quarternary carbon), d (doublet, CH-group), t (triplet,  $\text{CH}_2$ -group), q (quartet,  $\text{CH}_3$  group)] were determined by DEPT135 and HSQC spectra. Mass spectra (MS and HRMS) were determined in the chemistry department of the University Heidelberg under the direction of Dr. J. Gross.  $\text{EI}^+$ -spectra were measured on a JOEL JMS-700 spectrometer.  $\text{FAB}^+$ -spectra were obtained using a JOEL JMS-700 spectrometer as well. As  $\text{FAB}$ -matrix 3-nitrobenzyl alcohol (NBA) or o-nitrophenyl octyl ether (NPOE) was used. For  $\text{ESI}^+$ -spectra a Bruker ApexQu FT-ICR-MS spectrometer was applied. Infrared Spectroscopy (IR) was processed on an FT-IR BRUKER (IF528), IR PERKIN ELMER (283) or FT-IR Bruker Vektor 22. The solvent or matrix is denoted in brackets. For the most significant bands, the wave number ( $\text{cm}^{-1}$ ) is given. Gas Chromatography / Mass Spectrometry (GC MS) were carried out on two different systems: 1. HP 5972 Mass Selective Detector, coupled with a HP 5890 SERIES II plus Gas Chromatograph. 2. Agilent 5975C Mass Selective Detector, coupled with an Agilent 7890A Gas Chromatograph. In both cases, as a capillary column, an OPTIMA 5 cross-linked Methyl Silicone column (30 m x, 0.32 mm, 0.25  $\mu\text{m}$ ) was employed, and helium was used as the carrier gas. Gas Chromatography (GC) was carried out on a

HP 5890 SERIES II plus Gas Chromatograph. As a capillary column, an OPTIMA 5 cross-linked Methyl Silicone column (30 m x, 0.32 mm, 0.25  $\mu$ m) was employed, and nitrogen was used as the carrier gas. Melting points were measured in open glass capillaries in a Büchi melting point apparatus (according to Dr. Tottoli) and were not corrected. Flash Column Chromatography was accomplished using Silica gel 60 (0.04 – 0.063 mm / 230 – 400 mesh ASTM) purchased from Macherey-Nagel or Aluminium oxide (neutral or basic) purchased from Macherey-Nagel. As eluents, mixtures of petroleum ether (PE), ethyl acetate (EA), dichloromethane (DCM) and diethylether (Et<sub>2</sub>O) were used. Analytical Thin Layer Chromatography (TLC) was carried out on precoated Macherey-Nagel POLYGRAM® SIL G/UV254 or Merck TLC Silical Gel 60 F254 aluminium sheets or Macherey-nagel POLYGRAM® ALOX N/UV254 plastic sheets. Detection was accomplished using UV-light (254 nm), KMnO<sub>4</sub> (in 1.5 M Na<sub>2</sub>CO<sub>3</sub> (aq)), molybdotophosphoric acid (5 % in ethanol), vanillin / H<sub>2</sub>SO<sub>4</sub> (in ethanol) or anisaldehyde.

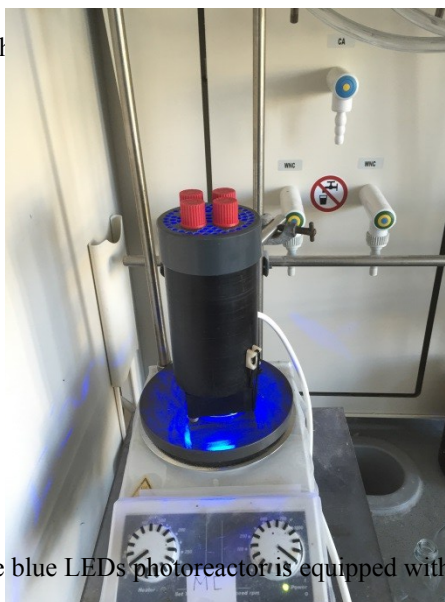

**Fig. 1** Reaction apparatus. The blue LEDs photoreactor is equipped with a fan at the bottom to keep the reactor at room temperature.

## General procedure for synthesis of P,N bidentate ligand

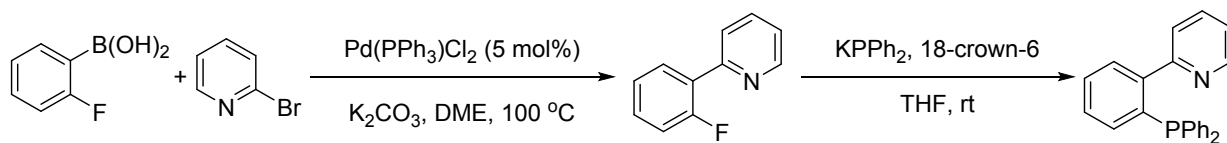

Step 1: To a flask equipped with a magnetic stir bar 2-bromo-pyridine (1 eq.) and 2-Fluorophenylboronic acid (1.3 eq.) were dissolved in a mixture of aqueous 2 M  $\text{K}_2\text{CO}_3$  (1 L/mol) and DME (2 L/mol). The mixture was degassed for approximately 30 min and  $\text{Pd}(\text{PPh}_3)_2\text{Cl}_2$  (5 mol%) was added. The mixture was heated to 100 °C overnight. The solution was cooled to room temperature and filtered through Celite. Then extracted with ethyl acetate, and dried over  $\text{Na}_2\text{SO}_4$ . After evaporation under vacuum, the crude product was purified by flash chromatography to afford 2-(2-fluorophenyl)pyridine in 78% yield.

Step 2: To a dry flask equipped with a magnetic stir bar was charged with 2-(2-fluorophenyl)pyridine (1 eq.) and 18-crown-6 (1.3 eq.) in THF. Then 0.5 M solution of  $\text{KPPH}_2$  (1.2 eq.) in THF was added dropwise to the above solution at -78 °C. The reaction was allowed to warm to room temperature and stirred for 24 h. The reaction was quenched with water and extracted with ether, dried over  $\text{Na}_2\text{SO}_4$  and concentrated under vacuum. The residue was purified by silica gel chromatography to afford 2-(2-(diphenylphosphanyl)phenyl)pyridine in 66% yield. <sup>[1]</sup>

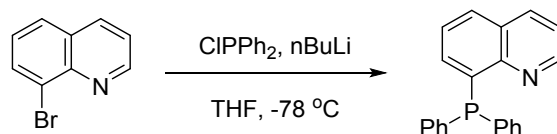

n-Butyllithium 2.5 M (1 eq) was added to a solution of 8-bromoquinoline (1 eq.) in THF at -78 °C dropwise. The mixture was stirred for 30 min. Then a solution of  $\text{ClPPh}_2$  (1 eq.) in THF was added slowly. The reaction was stirred for an additional 30 min at -78 °C, next allowed to warm to room temperature. The resulting solution was quenched with water and extracted with DCM dried over  $\text{Na}_2\text{SO}_4$  and concentrated under vacuum. The residue was purified by silica gel chromatography to afford 8-(diphenylphosphanyl)quinoline in 36% yield. <sup>[2]</sup>

## General procedure for synthesis of aryldiazonium salts 2

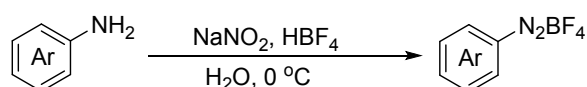

- 1) To a mixture of 4 mL of distilled water and 3.5 mL of 48% hydrofluoroboric acid was added corresponding anilines (10 mmol) in a 100 ml polyethylene beaker under ice bath. Then a sodium nitrite solution (0.69 g in 1.5 mL distilled water) was added dropwise to the above mixture. The resulting solution was stirred for another 0.5 h and the precipitate was collected by filtration. The crude product was purified by dissolving in minimum amount of acetone and precipitating with ether, then filtered and washed with ether for several times. After drying under vacuum, the obtained aryldiazonium salts were stored at -20 °C.

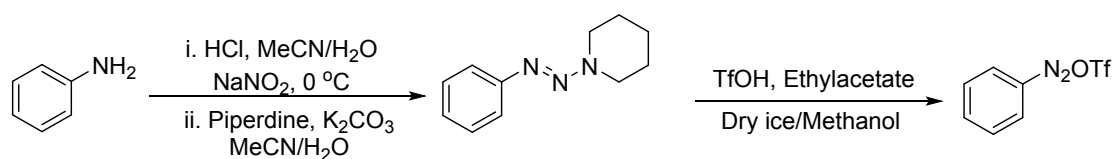

- 2) Step 1 : Concentrated aqueous HCl (7.6 mL, 91 mmol, 4.0 eq.) was added dropwise to a cooled solution of aniline (23 mmol, 1.0 eq.) in MeCN/H<sub>2</sub>O (2:1) 30 mL at 0 °C. The reaction mixture was further cooled to -5 °C with salt ice bath and a solution of NaNO<sub>2</sub> (2.4 g, 34 mmol, 30 mL water, 1.5 eq.) was added slowly, the reaction was stirred for 30 min while maintaining the reaction temperature below 0 °C. Then it was transferred slowly to a stirred solution of piperidine (5.6 mL, 57 mmol, 2.5 eq.) and potassium carbonate (16 g, 119 mmol, 5.2 eq.) in MeCN/H<sub>2</sub>O (2:1) 120 mL at 0 °C. After warming to room temperature, the mixture was stirred for additional 1 hour and then extracted with ethyl acetate, washed with brine and dried over Na<sub>2</sub>SO<sub>4</sub>. The crude product was concentrated under vacuum and purified by column chromatograph on silica gel to give the triazene product.

Step 2: Triflic acid (1.77 mL, 20 mmol, 2eq) was added dropwise to a solution of the above triazene product (2.3 g, 10 mmol, 1eq) in ethyl acetate 40 mL cooled with dry ice/methanol bath. The mixture was stirred for 30 min and ether 10 mL was added. The solid was collected by filtration. The crude product was purified by dissolving in minimum amount of acetone and precipitating with ether, then filtered and washed with ether for several times. After drying under vacuum, the obtained aryldiazonium salts were stored at -20 °C. <sup>[3]</sup>

### General procedure for synthesis of gold (I) complexes

DMSAuCl (1 equiv.) was dissolved in DCM (10 L/mol) and the corresponding ligand (1 equiv.) was added. After 2 hours of stirring in the dark, the solvent was removed under reduced pressure at room temperature. For further purification, the crude product was dissolved again in a small

amount of DCM, and the gold complex was precipitated by addition of *n*-pentane., the gold complex was obtained after filtrating and drying under vacuum.

#### **General procedure for halide exchange of gold (I) complexes 4b and 4c**

NaBr (0.5 mmol, 52 mg) was added to a solution of Chloro[8-(diphenylphosphino)quinolone]gold (0.2 mmol, 110 mg) in 10 mL acetone, then the mixture was stirred overnight. The solvent was removed under reduced pressure and DCM (5 mL) was added, filtered through a pad of celite and washed with DCM (5 mL). DCM was evaporated under vacuum, then the crude product was dissolved in minimum amount of DCM and EtOH (8 mL) was added, the solution was slowly reduced to ca. 2 mL, the remaining EtOH was removed with a glass pipet and then dried under vacuum. The product **4b** was obtained as a white solid in 86% yield.

NaI (0.3 mmol, 45 mg) was added to a solution of Chloro[8-(diphenylphosphino)quinolone]gold (0.2 mmol, 110 mg) in 10 mL acetone, then the mixture was stirred overnight. The solvent was removed under reduced pressure and DCM (5 mL) was added, filtered through a pad of celite and washed with DCM (5 mL). DCM was evaporated under vacuum, then the crude product was dissolved in minimum amount of DCM and EtOH (8 mL) was added, the solution was slowly reduced to ca. 2 mL, the remaining EtOH was removed with a glass pipet and then dried under vacuum. The product **4c** was obtained as a white solid in 91% yield.

#### **General procedure for synthesis of gold (III) complexes 3 and 5**

A Pyrex tube equipped with a magnetic stir bar was charged with aryldiazonium tetrafluoroborate **2** (0.08 mmol) and gold (I) complexe (0.08 mmol) in 0.3 mL DCM under N<sub>2</sub> atmosphere. Then the mixture was degassed using Freeze-Pump-Thaw methods for three cycles. The tube was sealed with screw cap and put into the 12 W Blue LEDs photoreactor thereafter. The reaction was irradiated 8-12 h for gold (I) **1** and 3-8h for gold (I) **4**. Then the product was precipitated by the addition of ether. After separation, the gold (III) complex was obtained as a white solid.

#### **General procedure for synthesis of gold (III) complexes 7**

A Pyrex tube equipped with a magnetic stir bar was charged with aromatic amine (0.16 mmol, 2 eq) in 0.15 mL MeCN. Then concentrated aqueous HCl (24 mg, 0.24 mmol, 3 eq) in 0.15 mL MeCN was added at 0 °C and stirred for 5 min, next *t*BuONO (24 µl, 0.176 mmol, 2.2 eq) was added. The reaction was stirred for another 15 min. The resulting mixture was freezed with liquid nitrogen and the corresponding gold (I) complex (0.08 mmol) was added, then degassed with Freeze-

Pump-Thaw methods for three cycles. The tube was sealed with screw cap and put into the 12 W Blue LEDs photoreactor thereafter. The reaction was irradiated 12-18 h. The product was precipitated by the addition of ether. After separation, the gold (III) complex was obtained as white solid.

### **General procedure for synthesis of gold (III) complexes 8**

A Pyrex tube equipped with a magnetic stir bar was charged with aromatic amine (0.2 mmol, 2 eq) in 0.25 mL MeCN. Then concentrated aqueous HCl (24 mg, 0.3 mmol, 3 eq) in 0.25 mL MeCN was added at 0 °C and stirred for 5 min, next *t*BuONO (24  $\mu$ l, 0.176 mmol, 2.2 eq) was added. The reaction was stirred for another 15 min. The resulting mixture was freezed with liquid nitrogen and the corresponding gold (I) complex (0.1 mmol) was added, then degassed with Freeze-Pump-Thaw methods for three cycles. The tube was sealed with screw cap and put into the 12 W Blue LEDs photoreactor thereafter. The reaction was irradiated 36 h. The solvent was removed under vacuum, the solid was washed with EtOH and ether. After filtration, the gold (III) complex was obtained as white solid.

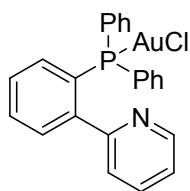

**Chloro[2-(2-(diphenylphosphanyl)phenyl)pyridine]gold, 1a:**  $^1\text{H}$  NMR (500 MHz,  $\text{CD}_2\text{Cl}_2$ ):  $\delta$  8.27 (d,  $J = 4.1$  Hz, 1H), 7.79-7.72 (m, 2H), 7.65 (dd,  $J_{1,2} = 7.6$  Hz, 1H), 7.58-7.54 (m, 5H), 7.52-7.49 (m, 2H), 7.46-7.40 (m, 5H), 7.22 (dd,  $J_1 = 6.2$ ,  $J_2 = 5.8$  Hz, 1H), 7.11 (dd,  $J_{1,2} = 7.9$  Hz, 1H);  $^{13}\text{C}$  NMR (125 MHz,  $\text{CD}_2\text{Cl}_2$ ):  $\delta$  157.3 (s), 148.3 (d), 145.4 (s), 137.5 (d), 135.6 (d, d:  $J_{\text{C-P}} = 6.6$  Hz), 134.4 (d, d:  $J_{\text{C-P}} = 14.0$  Hz), 132.0 (s, d:  $J_{\text{C-P}} = 11.6$  Hz), 131.9 (d), 131.6 (d), 130.7 (d, d:  $J_{\text{C-P}} = 7.8$  Hz), 129.3 (d, d:  $J_{\text{C-P}} = 11.7$  Hz), 128.9 (d, d:  $J_{\text{C-P}} = 9.3$  Hz), 128.2 (s, d:  $J_{\text{C-P}} = 60.4$  Hz), 123.7 (d), 123.3 (d);  $^{31}\text{P}$  NMR (202.5 MHz,  $\text{CD}_2\text{Cl}_2$ ):  $\delta$  31.3; IR (ATR)  $\nu$  3045, 1587, 1562, 1480, 1467, 1435, 1423, 1300, 1266, 1182, 1155, 1101, 1023, 998, 888, 852, 801, 762, 749, 724, 691  $\text{cm}^{-1}$ ; HRMS (ESI) for  $\text{C}_{23}\text{H}_{18}\text{AuClINaP}^+$  ( $\text{M}+\text{Na}$ ) $^+$ : 594.0423; Found: 594.0421.

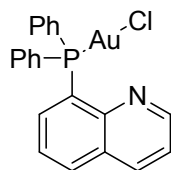

**Chloro[8-(diphenylphosphino)quinoline]gold, 4a:**  $^1\text{H}$  NMR (400 MHz,  $\text{CDCl}_3$ ):  $\delta$  8.81 (dd,  $J = 4.3$  Hz,  $J = 1.7$  Hz, 1H), 8.22 (dd,  $J = 8.3$  Hz,  $J = 1.5$  Hz, 1H), 8.05 (d,  $J = 8.3$  Hz, 1H), 7.62-7.41 (m, 12H), 7.25 (m, 1H);  $^{13}\text{C}$  NMR (100 MHz,  $\text{CDCl}_3$ ):  $\delta$  150.4 (d), 147.9 (s, d:  $J_{\text{C-P}} = 7.0$  Hz), 136.2 (d, d:  $J_{\text{C-P}} = 1.5$  Hz), 135.8 (d, d:  $J_{\text{C-P}} = 6.6$  Hz), 134.5 (d, d:  $J_{\text{C-P}} = 14.2$  Hz), 132.5 (d, d:  $J_{\text{C-P}} = 2.3$  Hz), 131.6 (d, d:  $J_{\text{C-P}} = 2.6$  Hz), 129.5 (s, d:  $J_{\text{C-P}} = 64.0$  Hz), 129.0 (d, d:  $J_{\text{C-P}} = 12.0$  Hz), 128.5 (s, d:  $J_{\text{C-P}} = 5.5$  Hz), 128.3 (s), 126.1 (d, d:  $J_{\text{C-P}} = 11.2$  Hz), 122.5 (d);  $^{31}\text{P}$  NMR (162 MHz,  $\text{CDCl}_3$ ):  $\delta$  26.4; IR (ATR)  $\nu$  2923, 2866, 1738, 1594, 1560, 1490, 1480, 1459, 1434, 1376, 1307, 1226, 1182, 1157, 1102, 1033, 996, 828, 790, 750, 712, 691  $\text{cm}^{-1}$ ; HRMS (ESI) for  $\text{C}_{21}\text{H}_{16}\text{AuNNaP}^+$  ( $\text{M}+\text{Na}$ ) $^+$ : 568.0267; Found: 568.0279.

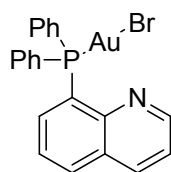

**Bromo[8-(diphenylphosphino)quinoline]gold, 4b:** 86%;  $^1\text{H}$  NMR (500 MHz,  $\text{CDCl}_3$ ):  $\delta$  8.75 (dd,  $J = 4.2$  Hz,  $J = 1.6$  Hz, 1H), 8.21 (d,  $J = 8.3$  Hz, 1H), 8.04 (d,  $J = 8.2$  Hz, 1H), 7.57-7.54 (m,

4H), 7.49 (td,  $J = 7.5$  Hz,  $J = 1.7$  Hz, 3H), 7.42-7.39 (m, 5H), 7.22 (dd,  $J = 12.9$  Hz,  $J = 7.1$  Hz, 1H);  $^{13}\text{C}$  NMR (125 MHz,  $\text{CDCl}_3$ ):  $\delta$  150.4 (d), 147.9 (s, d:  $J_{\text{C-P}} = 7.1$  Hz), 136.4 (d, d:  $J_{\text{C-P}} = 1.6$  Hz), 135.8 (d, d:  $J_{\text{C-P}} = 6.3$  Hz), 134.5 (d, d:  $J_{\text{C-P}} = 14.4$  Hz), 132.6 (d, d:  $J_{\text{C-P}} = 2.3$  Hz), 131.7 (d, d:  $J_{\text{C-P}} = 2.4$  Hz), 129.6 (s, d:  $J_{\text{C-P}} = 62.6$  Hz), 129.1 (d, d:  $J_{\text{C-P}} = 12.1$  Hz), 128.6 (s, d:  $J_{\text{C-P}} = 63.8$  Hz), 128.5 (s, d:  $J_{\text{C-P}} = 5.7$  Hz), 126.3 (d, d:  $J_{\text{C-P}} = 11.0$  Hz), 122.5 (d);  $^{31}\text{P}$  NMR (202.5 MHz,  $\text{CDCl}_3$ ):  $\delta$  26.7; IR (ATR)  $\nu$  3046, 1592, 1561, 1488, 1479, 1460, 1436, 1380, 1306, 1226, 1182, 1152, 1130, 1106, 1067, 1028, 999, 910, 837, 826, 809, 789, 775, 745, 691  $\text{cm}^{-1}$ ; HRMS (ESI) for  $\text{C}_{21}\text{H}_{17}\text{AuNPBr}^+$  ( $\text{M}+\text{H}$ ) $^+$ : 589.9942; Found : 589.9950.

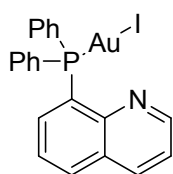

**Iodo[8-(diphenylphosphino)quinoline]gold, 4c:** 91%;  $^1\text{H}$  NMR (500 MHz,  $\text{CD}_2\text{Cl}_2$ ):  $\delta$  8.82 (dd,  $J = 4.2$  Hz,  $J = 1.6$  Hz, 1H), 8.28 (d,  $J = 8.3$  Hz, 1H), 8.09 (d,  $J = 8.2$  Hz, 1H), 7.62-7.58 (m, 4H), 7.56-7.53 (m, 3H), 7.50-7.44 (m, 5H), 7.28 (ddd,  $J = 12.7$  Hz,  $J = 7.2$  Hz,  $J = 1.1$  Hz, 1H);  $^{13}\text{C}$  NMR (125 MHz,  $\text{CD}_2\text{Cl}_2$ ):  $\delta$  150.6 (d), 148.1 (s, d:  $J_{\text{C-P}} = 7.5$  Hz), 136.8 (d, d:  $J_{\text{C-P}} = 1.6$  Hz), 136.4 (d, d:  $J_{\text{C-P}} = 5.9$  Hz), 134.6 (d, d:  $J_{\text{C-P}} = 14.5$  Hz), 132.8 (d, d:  $J_{\text{C-P}} = 2.3$  Hz), 131.9 (d, d:  $J_{\text{C-P}} = 2.4$  Hz), 130.2 (s, d:  $J_{\text{C-P}} = 60.2$  Hz), 129.4 (d, d:  $J_{\text{C-P}} = 11.8$  Hz), 129.0 (s, d:  $J_{\text{C-P}} = 61.4$  Hz), 128.9 (s, d:  $J_{\text{C-P}} = 5.3$  Hz), 126.6 (d, d:  $J_{\text{C-P}} = 10.6$  Hz), 122.8 (d);  $^{31}\text{P}$  NMR (202.5 MHz,  $\text{CD}_2\text{Cl}_2$ ):  $\delta$  33.05; IR (ATR)  $\nu$  3045, 1737, 1592, 1560, 1488, 1478, 1459, 1435, 1379, 1305, 1225, 1181, 1151, 1130, 1105, 1027, 998, 836, 789, 772, 744, 713, 689  $\text{cm}^{-1}$ ; HRMS (ESI) for  $\text{C}_{21}\text{H}_{17}\text{AuINP}^+$  ( $\text{M}+\text{H}$ ) $^+$ : 637.9803; Found : 637.9804.

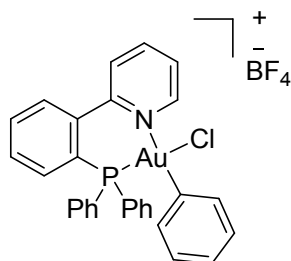

**Gold (III) complex 3a:** 78%;  $^1\text{H}$  NMR (300 MHz,  $\text{CD}_2\text{Cl}_2$ ):  $\delta$  9.14 (dt,  $J = 5.7$  Hz,  $J = 0.7$  Hz, 1H), 8.15 (td,  $J = 7.9$  Hz,  $J = 1.6$  Hz, 1H), 8.08-8.00 (m, 2H), 7.88 (dd,  $J = 8.0$  Hz,  $J = 0.6$  Hz, 1H), 7.82-7.75 (m, 1H), 7.67-7.56 (m, 3H), 7.51-7.22 (m, 9H), 7.12 (d,  $J = 7.0$  Hz, 2H), 7.01-6.89 (m, 3 H);  $^{13}\text{C}$  NMR (125 MHz,  $\text{CD}_2\text{Cl}_2$ ):  $\delta$  153.7 (s, d:  $J_{\text{C-P}} = 5.3$  Hz), 151.2 (d), 143.8 (d), 141.6 (s, d:



$J_{C-P} = 10.4$  Hz), 138.8 (s, d:  $J_{C-P} = 2.2$  Hz), 136.2 (d, d:  $J_{C-P} = 2.9$  Hz), 135.0 (d, d:  $J_{C-P} = 2.8$  Hz), 134.4 (d, d:  $J_{C-P} = 12.6$  Hz), 134.3 (d, d:  $J_{C-P} = 7.1$  Hz), 134.2 (d), 132.9 (d, d:  $J_{C-P} = 3.0$  Hz), 132.4 (d, d:  $J_{C-P} = 10.8$  Hz), 130.5 (d), 130.4 (d, d:  $J_{C-P} = 13.6$  Hz), 129.3 (d), 127.8 (d), 127.5 (d), 117.8 (s, d:  $J_{C-P} = 63.3$  Hz), one quaternary carbon atom could not be detected;  $^{31}\text{P}$  NMR (202.5 MHz,  $\text{CD}_2\text{Cl}_2$ ):  $\delta$  29.8; IR (ATR)  $\nu$  2962, 2918, 2850, 1599, 1565, 1490, 1471, 1437, 1259, 1014, 865, 793, 768, 755, 733, 719  $\text{cm}^{-1}$ ; HRMS (ESI) for  $\text{C}_{29}\text{H}_{23}\text{AuClNP}^+$  ( $\text{M-BF}_4$ ) $^+$  : 648.0921; Found : 648.0922; Elem. Anal. Calcd. For  $\text{C}_{29}\text{H}_{23}\text{AuBClF}_4\text{NP}$  : C, 47.34; H, 3.15; N, 1.90; Found: C, 46.88; H, 3.23; N, 1.77.

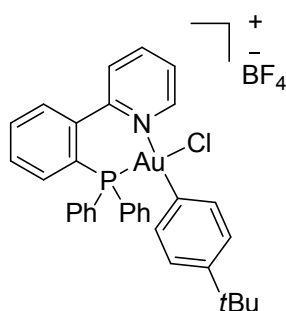

Gold (III) complex **3b**: 76%;  $^1\text{H}$  NMR (500 MHz,  $\text{CD}_2\text{Cl}_2$ ):  $\delta$  9.15 (d,  $J = 5.4$  Hz, 1H), 8.13 (td,  $J = 7.9$  Hz,  $J = 1.3$  Hz, 1H), 8.07-8.02 (m, 2H), 7.87 (d,  $J = 8.0$  Hz, 1H), 7.80-7.77 (m, 1H), 7.65 (dd,  $J = 7.0$  Hz,  $J = 6.3$  Hz, 1H), 7.58 (t,  $J = 6.9$  Hz, 2H), 7.52-6.94 (m, 13H), 1.12 (s, 9H);  $^{13}\text{C}$  NMR (125 MHz,  $\text{CD}_2\text{Cl}_2$ ):  $\delta$  153.8 (s, d:  $J_{C-P} = 5.3$  Hz), 151.1 (d), 151.0 (s), 143.7 (d), 141.6 (s, d:  $J_{C-P} = 10.4$  Hz), 136.2 (d, d:  $J_{C-P} = 3.0$  Hz), 135.8 (s, d:  $J_{C-P} = 2.9$  Hz), 134.9 (d), 134.5 (d, d:  $J_{C-P} = 12.3$  Hz), 134.4 (d, d:  $J_{C-P} = 4.2$  Hz), 134.3 (d), 132.4 (d, d:  $J_{C-P} = 10.8$  Hz), 132.1 (d, d:  $J_{C-P} = 3.1$  Hz), 130.4 (d, d:  $J_{C-P} = 13.2$  Hz), 129.3 (d, d:  $J_{C-P} = 0.9$  Hz), 127.7 (d), 127.5 (d), 117.9 (s, d:  $J_{C-P} = 63.2$  Hz), 34.6 (s), 31.4 (q), one quaternary carbon atom could not be detected;  $^{31}\text{P}$  NMR (202.5 MHz,  $\text{CD}_2\text{Cl}_2$ ):  $\delta$  30.0; IR (ATR)  $\nu$  3076, 2963, 2868, 1739, 1601, 1561, 1489, 1471, 1439, 1390, 1310, 1264, 1171, 1105, 1054, 1029, 1005, 812, 796, 756, 725, 691  $\text{cm}^{-1}$ ; HRMS (ESI) for  $\text{C}_{33}\text{H}_{31}\text{AuClNP}^+$  ( $\text{M-BF}_4$ ) $^+$  : 704.1543; Found : 704.1546.

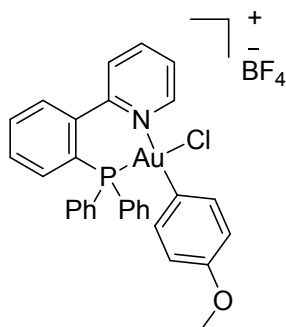

Gold (III) complex **3c**: 71%;  $^1\text{H}$  NMR (500 MHz,  $\text{d}^6$ -Acetone):  $\delta$  9.31 (d,  $J = 5.5$  Hz, 1H), 8.33 (m, 1H), 8.25 (dd,  $J = 7.4$  Hz,  $J = 5.3$  Hz, 1H), 8.12-8.08 (m, 2H), 7.92-7.88 (m, 2H), 7.70-7.48 (m, 11H), 7.14 (d,  $J = 7.8$  Hz, 2H), 6.52 (d,  $J = 7.8$  Hz, 2H), 3.66 (s, 3H);  $^{13}\text{C}$  NMR (125 MHz,  $\text{CD}_2\text{Cl}_2$ ):  $\delta$  159.3 (s), 153.7 (s, d:  $J_{\text{C-P}} = 5.5$  Hz), 151.2 (d), 143.7 (d), 141.6 (s, d:  $J_{\text{C-P}} = 10.4$  Hz), 136.1 (s, d:  $J_{\text{C-P}} = 2.9$  Hz), 135.0 (d, d:  $J_{\text{C-P}} = 3.4$  Hz), 134.5 (d, d:  $J_{\text{C-P}} = 11.2$  Hz), 134.4 (d, d:  $J_{\text{C-P}} = 7.2$  Hz), 134.3 (d, d:  $J_{\text{C-P}} = 9.9$  Hz), 133.1 (d, d:  $J_{\text{C-P}} = 3.4$  Hz), 132.4 (d, d:  $J_{\text{C-P}} = 10.9$  Hz), 130.4 (d, d:  $J_{\text{C-P}} = 13.4$  Hz), 129.2 (d, d:  $J_{\text{C-P}} = 0.9$  Hz), 127.8 (d, d:  $J_{\text{C-P}} = 2.1$  Hz), 127.5 (d), 117.9 (s, d:  $J_{\text{C-P}} = 63.5$  Hz), 116.0 (d, d:  $J_{\text{C-P}} = 1.2$  Hz), 55.8 (q), one quaternary carbon atom could not be detected;  $^{31}\text{P}$  NMR (202.5 MHz,  $\text{d}^6$ -Acetone):  $\delta$  29.8; IR (ATR)  $\nu$  3069, 2835, 1600, 1584, 1572, 1488, 1438, 1285, 1244, 1176, 1099, 1049, 1029, 999, 819, 791, 759, 750, 725, 711, 691  $\text{cm}^{-1}$ ; HRMS (ESI) for  $\text{C}_{30}\text{H}_{25}\text{AuClINOP}^+$  ( $\text{M-BF}_4$ ) $^+$  : 678.1022; Found : 678.1024.

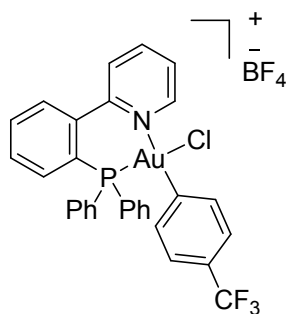

Gold (III) complex **3d**: 88%;  $^1\text{H}$  NMR (500 MHz, acetone- $\text{d}^6$ ):  $\delta$  9.33 (d,  $J = 5.6$  Hz, 1H), 8.35 (t,  $J = 7.8$  Hz, 1H), 8.27 (dd,  $J = 7.5$  Hz,  $J = 5.3$  Hz, 1H), 8.13-8.11 (m, 2H), 7.93-7.91 (m, 2H), 7.76-7.49 (m, 13H), 7.21 (brs, 2H);  $^{13}\text{C}$  NMR (125 MHz, acetone- $\text{d}^6$ ):  $\delta$  154.2 (s, d:  $J_{\text{C-P}} = 5.8$  Hz), 152.2 (d), 144.5 (d), 144.3 (s), 142.1 (s, d:  $J_{\text{C-P}} = 10.6$  Hz), 136.3 (d, d:  $J_{\text{C-P}} = 2.9$  Hz), 135.5 (d, d:  $J_{\text{C-P}} = 11.5$  Hz), 135.3 (d), 135.1 (d, d:  $J_{\text{C-P}} = 6.9$  Hz), 134.6 (d, d:  $J_{\text{C-P}} = 6.2$  Hz), 134.5 (d, d:  $J_{\text{C-P}} = 6.9$  Hz), 132.7 (d, d:  $J_{\text{C-P}} = 10.9$  Hz), 130.7 (d, d:  $J_{\text{C-P}} = 13.5$  Hz), 130.0 (d), 129.1 (s, q:  $J_{\text{C-F}} = 32.3$  Hz), 128.1 (d), 126.3 (d, q:  $J_{\text{C-F}} = 2.7$  Hz), 124.8 (s, q:  $J_{\text{C-F}} = 271.3$  Hz), 118.6 (s, d:  $J_{\text{C-P}} =$

64.4 Hz), one quaternary carbon atom could not be detected;  $^{31}\text{P}$  NMR (202.5 MHz,  $\text{CD}_2\text{Cl}_2$ ):  $\delta$  29.1; IR (ATR)  $\nu$  3072, 1737, 1593, 1562, 1491, 1440, 1394, 1325, 1282, 1269, 1156, 1102, 1049, 1033, 1007, 838, 822, 791, 764, 725, 692  $\text{cm}^{-1}$ ; HRMS (ESI) for  $\text{C}_{30}\text{H}_{22}\text{AuClF}_3\text{NP}^+$  ( $\text{M-BF}_4$ ) $^+$  : 716.0791; Found : 716.0792.

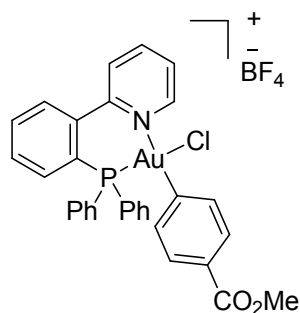

Gold (III) complex **3e**: 92%;  $^1\text{H}$  NMR (500 MHz,  $\text{CD}_2\text{Cl}_2$ ):  $\delta$  9.14 (d,  $J = 5.5$  Hz, 1H), 8.18-8.15 (m, 1H), 8.08-8.03 (m, 2H), 7.88 (d,  $J = 7.9$  Hz, 1H), 7.82-7.78 (m, 1H), 7.68-7.66 (m, 1H), 7.60-7.26 (m, 15H), 3.84 (s, 3H);  $^{13}\text{C}$  NMR (125 MHz,  $\text{CD}_2\text{Cl}_2$ ):  $\delta$  166.3 (s), 153.5 (s, d:  $J_{\text{C-P}} = 5.7$  Hz), 151.3 (d), 144.2 (s, d:  $J_{\text{C-P}} = 2.2$  Hz), 143.9 (d), 141.6 (s, d:  $J_{\text{C-P}} = 10.5$  Hz), 136.3 (d, d:  $J_{\text{C-P}} = 2.9$  Hz), 135.2 (d), 134.5 (d, d:  $J_{\text{C-P}} = 11.5$  Hz), 134.4 (d, d:  $J_{\text{C-P}} = 5.3$  Hz), 134.3 (d, d:  $J_{\text{C-P}} = 2.3$  Hz), 133.0 (d, d:  $J_{\text{C-P}} = 2.9$  Hz), 132.5 (d, d:  $J_{\text{C-P}} = 10.9$  Hz), 130.8 (d), 130.5 (d, d:  $J_{\text{C-P}} = 13.9$  Hz), 129.5 (s), 129.3 (d), 127.7 (d), 117.3 (s, d:  $J_{\text{C-P}} = 63.7$  Hz), 52.5 (q), one quaternary carbon atom could not be detected;  $^{31}\text{P}$  NMR (202.5 MHz,  $\text{CD}_2\text{Cl}_2$ ):  $\delta$  29.8;  $^{19}\text{F}$  NMR (470.6 MHz,  $\text{CD}_2\text{Cl}_2$ ):  $\delta$  -152.4 (s), -152.5(s); IR (ATR)  $\nu$  3079, 3059, 2961, 1728, 1601, 1583, 1562, 1491, 1475, 1439, 1391, 1313, 1272, 1203, 1182, 1106, 1052, 1008, 997, 890, 848, 824, 790, 760, 747, 726, 711, 690  $\text{cm}^{-1}$ ; HRMS (ESI) for  $\text{C}_{29}\text{H}_{23}\text{AuClNP}^+$  ( $\text{M-BF}_4$ ) $^+$  : 706.0972; Found : 706.0974.

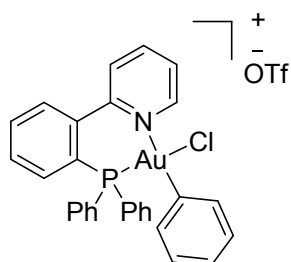

Gold (III) complex **3f**: 91%;  $^1\text{H}$  NMR (500 MHz,  $\text{CD}_2\text{Cl}_2$ ):  $\delta$  9.14 (d,  $J = 5.2$  Hz, 1H), 8.15 (td,  $J = 7.9$  Hz,  $J = 1.5$  Hz, 1H), 8.07-8.02 (m, 2H), 7.89 (d,  $J = 8.0$  Hz, 1H), 7.80-7.76 (m, 1H), 7.65-7.12 (m, 14H), 6.98 (t,  $J = 7.3$  Hz, 1H), 6.91 (brs, 2H);  $^{13}\text{C}$  NMR (125 MHz,  $\text{CD}_2\text{Cl}_2$ ):  $\delta$  153.7 (s, d:  $J_{\text{C-P}} = 5.3$  Hz), 151.2 (d), 143.8 (d), 141.5 (s, d:  $J_{\text{C-P}} = 10.2$  Hz), 138.9 (s, d:  $J_{\text{C-P}} = 1.9$  Hz), 136.1 (d, d:  $J_{\text{C-P}} = 2.9$  Hz), 135.0 (d, d:  $J_{\text{C-P}} = 2.9$  Hz), 134.4 (d, d:  $J_{\text{C-P}} = 12.8$  Hz), 134.3 (d, d:  $J_{\text{C-P}} = 2.3$  Hz), 133.0 (d, d:  $J_{\text{C-P}} = 2.9$  Hz), 132.5 (d, d:  $J_{\text{C-P}} = 10.9$  Hz), 130.8 (d), 130.5 (d, d:  $J_{\text{C-P}} = 13.9$  Hz), 129.5 (s), 129.3 (d), 127.7 (d), 117.3 (s, d:  $J_{\text{C-P}} = 63.7$  Hz), 52.5 (q), one quaternary carbon atom could not be detected;  $^{31}\text{P}$  NMR (202.5 MHz,  $\text{CD}_2\text{Cl}_2$ ):  $\delta$  29.8;  $^{19}\text{F}$  NMR (470.6 MHz,  $\text{CD}_2\text{Cl}_2$ ):  $\delta$  -152.4 (s), -152.5(s); IR (ATR)  $\nu$  3079, 3059, 2961, 1728, 1601, 1583, 1562, 1491, 1475, 1439, 1391, 1313, 1272, 1203, 1182, 1106, 1052, 1008, 997, 890, 848, 824, 790, 760, 747, 726, 711, 690  $\text{cm}^{-1}$ ; HRMS (ESI) for  $\text{C}_{29}\text{H}_{23}\text{AuClNP}^+$  ( $\text{M-BF}_4$ ) $^+$  : 706.0972; Found : 706.0974.

$p = 0.8$  Hz), 134.2 (d), 132.9 (d, d:  $J_{C-P} = 3.0$  Hz), 132.4 (d, d:  $J_{C-P} = 10.6$  Hz), 130.5 (d), 130.4 (d, d:  $J_{C-P} = 13.2$  Hz), 129.3 (d, d:  $J_{C-P} = 0.9$  Hz), 127.7 (d), 127.5 (d), 121.3 (s, d:  $J_{C-F} = 321.9$  Hz), 117.8 (s, d:  $J_{C-P} = 63.4$  Hz), one quaternary carbon atom could not be detected;  $^{31}\text{P}$  NMR (202.5 MHz,  $\text{CD}_2\text{Cl}_2$ ):  $\delta$  29.7;  $^{19}\text{F}$  NMR (470.6 MHz,  $\text{CD}_2\text{Cl}_2$ ):  $\delta$  -78.9 (s); IR (ATR)  $\nu$  3059, 1601, 1565, 1473, 1438, 1262, 1222, 1155, 1104, 1067, 1029, 995, 753, 709, 690  $\text{cm}^{-1}$ ; HRMS (ESI) for  $\text{C}_{29}\text{H}_{23}\text{AuClNP}^+ (\text{M-OTf})^+$  : 648.0917; Found : 648.0928.

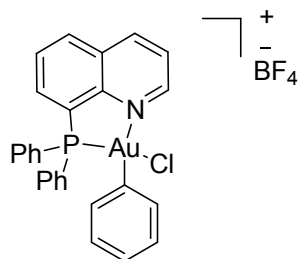

Gold (III) complex **5a**: 88%;  $^1\text{H}$  NMR (500 MHz,  $\text{MeCN-d}_3$ ):  $\delta$  10.12 (dd,  $J = 5.2$  Hz,  $J = 1.4$  Hz, 1H), 9.04 (dt,  $J = 8.4$  Hz,  $J = 1.7$  Hz, 1H), 8.58 (d,  $J = 8.2$  Hz, 1H), 8.34-8.30 (m, 1H), 8.17 (dd,  $J = 8.4$  Hz,  $J = 5.2$  Hz, 1H), 8.01 (td,  $J = 7.7$  Hz,  $J = 2.5$  Hz, 1H), 7.78-7.74 (m, 2H), 7.59-7.51 (m, 8H), 7.15 (dd,  $J = 7.3$  Hz,  $J = 7.0$  Hz, 1H), 7.05 (dd,  $J = 7.8$  Hz,  $J = 7.4$  Hz, 2H), 7.01-6.99 (m, 2H);  $^{13}\text{C}$  NMR (125 MHz,  $\text{MeCN-d}_3$ ):  $\delta$  153.6 (d), 150.1 (s, d:  $J_{C-P} = 13.2$  Hz), 144.6 (d, d:  $J_{C-P} = 1.5$  Hz), 141.8 (d, d:  $J_{C-P} = 2.3$  Hz), 136.7 (d, d:  $J_{C-P} = 2.6$  Hz), 135.8 (d, d:  $J_{C-P} = 3.3$  Hz), 135.4 (d, d:  $J_{C-P} = 12.0$  Hz), 133.6 (d, d:  $J_{C-P} = 2.5$  Hz), 132.4 (s, d:  $J_{C-P} = 0.9$  Hz), 132.2 (s, d:  $J_{C-P} = 8.9$  Hz), 131.2 (d, d:  $J_{C-P} = 0.8$  Hz), 131.0 (d, d:  $J_{C-P} = 13.7$  Hz), 130.9 (d, d:  $J_{C-P} = 10.4$  Hz), 128.4 (d), 126.3 (s, d:  $J_{C-P} = 65.4$  Hz), 125.8 (d), 121.1 (s, d:  $J_{C-P} = 73.7$  Hz);  $^{31}\text{P}$  NMR (202.5 MHz,  $\text{MeCN-d}_3$ ):  $\delta$  38.2;  $^{19}\text{F}$  NMR (470.6 MHz,  $\text{MeCN-d}_3$ ):  $\delta$  -151.6 (s), -151.7 (s); IR (ATR)  $\nu$  3072, 2920, 2850, 1746, 1564, 1503, 1478, 1383, 1284, 1234, 1190, 1166, 1099, 1054, 994, 862, 837, 805, 778, 755, 722, 708, 692  $\text{cm}^{-1}$ ; HRMS (ESI) for  $\text{C}_{27}\text{H}_{21}\text{AuClNP}^+ (\text{M-BF}_4)^+$  : 622.0760; Found : 622.0762; Elem. Anal. Calcd. For  $\text{C}_{27}\text{H}_{21}\text{AuBClF}_4\text{NP}$  : C, 45.70; H, 2.98; N, 1.97; Found: C, 45.66; H, 3.12; N, 1.77.

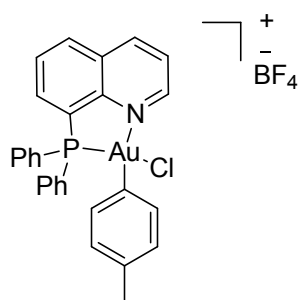

Gold (III) complex **5b**: 68%;  $^1\text{H}$  NMR (500 MHz,  $\text{CD}_2\text{Cl}_2$ ):  $\delta$  10.12 (d,  $J = 5.0$  Hz, 1H), 9.05 (d,  $J = 8.4$  Hz, 1H), 8.61 (d,  $J = 8.1$  Hz, 1H), 8.28-8.24 (m, 1H), 8.15 (dd,  $J = 8.4$  Hz,  $J = 5.2$  Hz, 1H), 8.08 (td,  $J = 7.8$  Hz,  $J = 2.3$  Hz, 1H), 7.79-7.76 (m, 2H), 7.61-7.57 (m, 4H), 7.48 (d,  $J = 7.8$  Hz, 2H), 7.45 (d,  $J = 7.8$  Hz, 2H), 6.91 (d,  $J = 8.1$  Hz, 2H), 6.81 (d,  $J = 8.1$  Hz, 2H), 2.29 (s, 3H);  $^{13}\text{C}$  NMR (125 MHz,  $\text{CD}_2\text{Cl}_2$ ):  $\delta$  153.2 (d), 149.5 (s, d:  $J_{\text{C-P}} = 13.0$  Hz), 144.4 (d, d:  $J_{\text{C-P}} = 1.5$  Hz), 141.5 (d, d:  $J_{\text{C-P}} = 2.1$  Hz), 138.3 (s), 136.6 (d, d:  $J_{\text{C-P}} = 2.7$  Hz), 135.6 (d, d:  $J_{\text{C-P}} = 3.4$  Hz), 134.3 (d, d:  $J_{\text{C-P}} = 11.8$  Hz), 132.2 (d, d:  $J_{\text{C-P}} = 2.4$  Hz), 131.7 (s), 131.6 (d, d:  $J_{\text{C-P}} = 0.9$  Hz), 130.8 (d, d:  $J_{\text{C-P}} = 13.7$  Hz), 130.7 (d, d:  $J_{\text{C-P}} = 10.0$  Hz), 127.8 (s, d:  $J_{\text{C-P}} = 1.4$  Hz), 125.2 (d), 125.0 (s, d:  $J_{\text{C-P}} = 65.0$  Hz), 120.0 (s, d:  $J_{\text{C-P}} = 73.5$  Hz), 20.7 (q);  $^{31}\text{P}$  NMR (202.5 MHz,  $\text{CD}_2\text{Cl}_2$ ):  $\delta$  37.5;  $^{19}\text{F}$  NMR (470.6 MHz,  $\text{CD}_2\text{Cl}_2$ ):  $\delta$  -152.4 (s), -152.5 (s); IR (ATR)  $\nu$  3086, 1608, 1588, 1571, 1500, 1488, 1438, 1381, 1371, 1315, 1284, 1233, 1208, 1187, 1165, 1146, 1100, 1057, 1013, 995, 862, 844, 806, 789, 776, 754, 738, 724, 708, 688  $\text{cm}^{-1}$ ; HRMS (ESI) for  $\text{C}_{28}\text{H}_{23}\text{AuNPtCl}^+ (\text{M-BF}_4)^+$  : 636.0917; Found : 636.0927; Elem. Anal. Calcd. For  $\text{C}_{28}\text{H}_{23}\text{AuBClF}_4\text{NP}$  : C, 46.47; H, 3.20; N, 1.94; Found: C, 46.18; H, 3.31; N, 2.07.

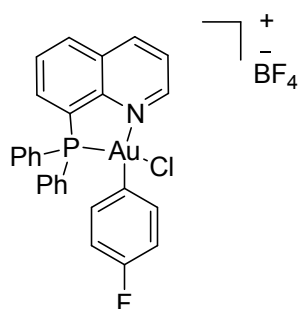

Gold (III) complex **5c**: 71%;  $^1\text{H}$  NMR (500 MHz,  $\text{CD}_2\text{Cl}_2$ ):  $\delta$  10.15 (dd,  $J = 5.2$  Hz,  $J = 1.3$  Hz, 1H), 9.04 (dt,  $J = 8.3$  Hz,  $J = 1.6$  Hz, 1H), 8.59 (d,  $J = 8.2$  Hz, 1H), 8.25 (m, 1H), 8.13 (dd,  $J = 8.3$  Hz,  $J = 5.2$  Hz, 1H), 8.06 (td,  $J = 7.7$  Hz,  $J = 2.5$  Hz, 1H), 7.78-7.75 (m, 2H), 7.61-7.57 (m, 4H), 7.49 (d,  $J = 8.1$  Hz, 2H), 7.46 (d,  $J = 8.1$  Hz, 2H), 6.95-6.92 (m, 2H), 6.84 (t,  $J = 8.8$  Hz, 2H);  $^{13}\text{C}$  NMR (125 MHz,  $\text{CD}_2\text{Cl}_2$ ):  $\delta$  162.7 (s, d:  $J_{\text{C-F}} = 247.1$  Hz), 153.3 (d), 149.6 (s, d:  $J_{\text{C-P}} = 13.3$  Hz), 144.5 (d, d:  $J_{\text{C-P}} = 1.3$  Hz), 141.4 (d, d:  $J_{\text{C-P}} = 2.2$  Hz), 136.6 (d, d:  $J_{\text{C-P}} = 2.7$  Hz), 135.7 (d, d:  $J_{\text{C-P}} = 3.4$  Hz), 134.3 (d, d:  $J_{\text{C-P}} = 11.8$  Hz), 133.7 (d, dd:  $J_{\text{C-F}} = 7.3$  Hz,  $J_{\text{C-P}} = 2.5$  Hz), 131.7 (s, d:  $J_{\text{C-P}} = 8.8$  Hz), 130.8 (d, d:  $J_{\text{C-P}} = 13.5$  Hz), 130.7 (d, d:  $J_{\text{C-P}} = 11.3$  Hz), 125.2 (d), 124.9 (s, d:  $J_{\text{C-P}} = 65.4$  Hz), 124.8 (s), 119.7 (s, d:  $J_{\text{C-P}} = 73.5$  Hz), 117.6 (d, dd:  $J_{\text{C-F}} = 21.4$  Hz,  $J_{\text{C-P}} = 0.9$  Hz);  $^{31}\text{P}$  NMR (202.5 MHz,  $\text{CD}_2\text{Cl}_2$ ):  $\delta$  38.8;  $^{19}\text{F}$  NMR (470.6 MHz,  $\text{CD}_2\text{Cl}_2$ ):  $\delta$  -152.2 (s), -152.3 (s); IR

(ATR)  $\nu$  3088, 1587, 1577, 1499, 1486, 1459, 1438, 1380, 1372, 1316, 1224, 1191, 1160, 1146, 1099, 1055, 1008, 997, 863, 828, 778, 755, 738, 722, 709, 690  $\text{cm}^{-1}$ ; HRMS (ESI) for  $\text{C}_{27}\text{H}_{20}\text{AuFNPCl}^+ (\text{M-BF}_4)^+$  : 640.0666; Found : 640.0678; Elem. Anal. Calcd. For  $\text{C}_{27}\text{H}_{20}\text{AuBClF}_5\text{NP}$  : C, 44.57; H, 2.77; N, 1.92; Found: C, 44.48; H, 2.99; N, 1.93.

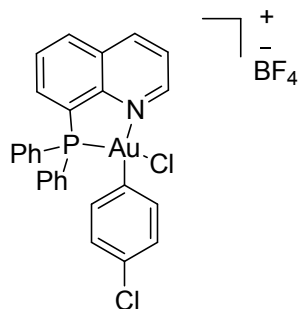

Gold (III) complex **5d**: 86%;  $^1\text{H}$  NMR (500 MHz,  $\text{MeCN-d}_3$ ):  $\delta$  10.12 (dd,  $J = 5.2$  Hz,  $J = 1.3$  Hz, 1H), 9.06 (dt,  $J = 8.4$  Hz,  $J = 1.8$  Hz, 1H), 8.59 (d,  $J = 8.2$  Hz, 1H), 8.32 (m, 1H), 8.17 (dd,  $J = 8.4$  Hz,  $J = 5.2$  Hz, 1H), 8.01 (td,  $J = 7.7$  Hz,  $J = 2.5$  Hz, 1H), 7.80-7.76 (m, 2H), 7.59-7.55 (m, 8H), 7.09 (d,  $J = 8.6$  Hz, 2H), 6.98 (dd,  $J = 8.6$  Hz,  $J = 1.5$  Hz, 2H);  $^{13}\text{C}$  NMR (125 MHz,  $\text{MeCN-d}_3$ ):  $\delta$  153.7 (d), 150.2 (s, d:  $J_{\text{C-P}} = 13.3$  Hz), 144.7 (d, d:  $J_{\text{C-P}} = 1.4$  Hz), 141.8 (d, d:  $J_{\text{C-P}} = 2.3$  Hz), 136.8 (d, d:  $J_{\text{C-P}} = 2.8$  Hz), 136.0 (d, d:  $J_{\text{C-P}} = 3.4$  Hz), 135.4 (d, d:  $J_{\text{C-P}} = 11.9$  Hz), 134.9 (d, d:  $J_{\text{C-P}} = 2.5$  Hz), 134.2 (s), 132.2 (s, d:  $J_{\text{C-P}} = 9.0$  Hz), 131.0 (d, d:  $J_{\text{C-P}} = 13.5$  Hz), 130.9 (d, d:  $J_{\text{C-P}} = 11.0$  Hz), 130.8 (d), 130.0 (s), 126.1 (s, d:  $J_{\text{C-P}} = 65.8$  Hz), 125.9 (d), 120.9 (s, d:  $J_{\text{C-P}} = 73.6$  Hz);  $^{31}\text{P}$  NMR (202.5 MHz,  $\text{MeCN-d}_3$ ):  $\delta$  39.4;  $^{19}\text{F}$  NMR (470.6 MHz,  $\text{MeCN-d}_3$ ):  $\delta$  -151.6 (s), -151.7 (s); IR (ATR)  $\nu$  3094, 1609, 1591, 1572, 1500, 1475, 1439, 1382, 1317, 1288, 1233, 1191, 1165, 1147, 1101, 1085, 1049, 999, 865, 842, 832, 817, 777, 753, 738, 723, 710, 689  $\text{cm}^{-1}$ ; HRMS (ESI) for  $\text{C}_{27}\text{H}_{20}\text{AuCl}_2\text{NP}^+ (\text{M-BF}_4)^+$  : 656.0371; Found : 656.0383; Elem. Anal. Calcd. For  $\text{C}_{27}\text{H}_{20}\text{AuBCl}_2\text{F}_4\text{NP}$  : C, 43.58; H, 2.71; N, 1.88; Found: C, 43.53; H, 2.83; N, 2.02.

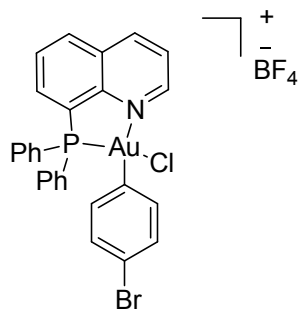

Gold (III) complex **5e**: 74%;  $^1\text{H}$  NMR (500 MHz,  $\text{MeCN-d}_3$ ):  $\delta$  10.12 (dd,  $J = 5.2$  Hz,  $J = 1.4$  Hz, 1H), 9.05 (dt,  $J = 8.4$  Hz,  $J = 1.7$  Hz, 1H), 8.59 (d,  $J = 8.1$  Hz, 1H), 8.35-8.31 (m, 1H), 8.17 (dd,  $J$

= 8.4 Hz,  $J$  = 5.3 Hz, 1H), 8.01 (td,  $J$  = 7.6 Hz,  $J$  = 2.5 Hz, 1H), 7.80-7.76 (m, 2H), 7.59-7.55 (m, 8H), 7.22 (d,  $J$  = 8.5 Hz, 2H), 6.92 (dd,  $J$  = 8.5 Hz,  $J$  = 1.6 Hz, 2H);  $^{13}\text{C}$  NMR (125 MHz, MeCN- $\text{d}^3$ ):  $\delta$  153.7 (d), 150.2 (s, d:  $J_{\text{C-P}}$  = 13.2 Hz), 144.7 (d, d:  $J_{\text{C-P}}$  = 1.3 Hz), 141.8 (d, d:  $J_{\text{C-P}}$  = 2.3 Hz), 136.8 (d, d:  $J_{\text{C-P}}$  = 2.8 Hz), 136.0 (d, d:  $J_{\text{C-P}}$  = 3.3 Hz), 135.4 (d, d:  $J_{\text{C-P}}$  = 12.0 Hz), 135.3 (d, d:  $J_{\text{C-P}}$  = 2.5 Hz), 133.7 (d, d:  $J_{\text{C-P}}$  = 0.8 Hz), 132.2 (s, d:  $J_{\text{C-P}}$  = 9.1 Hz), 131.1 (d, d:  $J_{\text{C-P}}$  = 13.4 Hz), 131.0 (d, d:  $J_{\text{C-P}}$  = 10.7 Hz), 130.9 (s), 126.1 (s, d:  $J_{\text{C-P}}$  = 67.2 Hz), 125.9 (d), 122.3 (s), 120.9 (s, d:  $J_{\text{C-P}}$  = 73.4 Hz);  $^{31}\text{P}$  NMR (202.5 MHz, MeCN- $\text{d}^3$ ):  $\delta$  39.4;  $^{19}\text{F}$  NMR (470.6 MHz, MeCN- $\text{d}^3$ ):  $\delta$  -151.6 (s), -151.7 (s); IR (ATR)  $\nu$  3063, 1609, 1590, 1577, 1555, 1503, 1474, 1439, 1374, 1314, 1282, 1232, 1215, 1191, 1159, 1099, 1050, 998, 865, 837, 814, 779, 751, 723, 709, 688  $\text{cm}^{-1}$ ; HRMS (ESI) for  $\text{C}_{27}\text{H}_{30}\text{AuBrClNP}^+$  ( $\text{M-BF}_4$ ) $^+$  : 699.9865; Found : 699.9881; Elem. Anal. Calcd. For  $\text{C}_{27}\text{H}_{20}\text{AuBBBrClF}_4\text{NP}$  : C, 41.12; H, 2.56; N, 1.78; Found: C, 41.01; H, 2.79; N, 1.62.

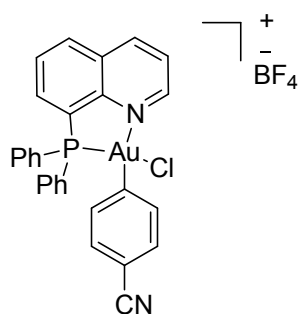

Gold (III) complex **5f**: 91%;  $^1\text{H}$  NMR (500 MHz, MeCN- $\text{d}^3$ ):  $\delta$  10.12 (dd,  $J$  = 5.3 Hz,  $J$  = 1.4 Hz, 1H), 9.07 (dt,  $J$  = 8.4 Hz,  $J$  = 1.7 Hz, 1H), 8.60 (d,  $J$  = 8.2 Hz, 1H), 8.37-8.33 (m, 1H), 8.18 (dd,  $J$  = 8.4 Hz,  $J$  = 5.3 Hz, 1H), 8.02 (td,  $J$  = 7.6 Hz,  $J$  = 2.5 Hz, 1H), 7.80-7.76 (m, 2H), 7.61-7.55 (m, 8H), 7.38 (d,  $J$  = 8.4 Hz, 2H), 7.20 (dd,  $J$  = 8.4 Hz,  $J$  = 1.5 Hz, 2H);  $^{13}\text{C}$  NMR (125 MHz, MeCN- $\text{d}^3$ ):  $\delta$  153.8 (d), 150.2 (s, d:  $J_{\text{C-P}}$  = 13.4 Hz), 144.9 (d, d:  $J_{\text{C-P}}$  = 1.5 Hz), 141.8 (d, d:  $J_{\text{C-P}}$  = 2.4 Hz), 138.7 (s), 136.9 (d, d:  $J_{\text{C-P}}$  = 2.8 Hz), 136.1 (d, d:  $J_{\text{C-P}}$  = 3.5 Hz), 135.4 (d, d:  $J_{\text{C-P}}$  = 12.1 Hz), 134.7 (d, d:  $J_{\text{C-P}}$  = 2.4 Hz), 134.0 (d), 132.2 (s, d:  $J_{\text{C-P}}$  = 8.8 Hz), 131.1 (d, d:  $J_{\text{C-P}}$  = 13.6 Hz), 131.0 (d, d:  $J_{\text{C-P}}$  = 11.6 Hz), 126.0 (s, d:  $J_{\text{C-P}}$  = 66.4 Hz), 125.9 (d), 120.7 (s, d:  $J_{\text{C-P}}$  = 73.4 Hz), 119.0 (s), 112.1 (s);  $^{31}\text{P}$  NMR (202.5 MHz, MeCN- $\text{d}^3$ ):  $\delta$  40.18;  $^{19}\text{F}$  NMR (470.6 MHz, MeCN- $\text{d}^3$ ):  $\delta$  -151.6 (s), -151.7 (s); IR (ATR)  $\nu$  3096, 3067, 2228, 1611, 1576, 1505, 1480, 1436, 1389, 1315, 1281, 1239, 1215, 1191, 1162, 1145, 1101, 1080, 1060, 1026, 997, 866, 839, 819, 781, 749, 723, 707, 689  $\text{cm}^{-1}$ ; HRMS (ESI) for  $\text{C}_{28}\text{H}_{20}\text{AuClN}_2\text{P}^+$  ( $\text{M-BF}_4$ ) $^+$  : 647.0713; Found : 647.0723; Elem. Anal. Calcd. For  $\text{C}_{28}\text{H}_{20}\text{AuBClF}_4\text{N}_2\text{P}$  : C, 45.78; H, 2.74; N, 3.81; Found: C, 45.34; H, 2.76; N, 3.88.

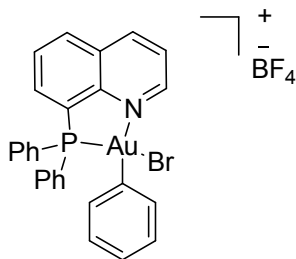

Gold (III) complex **5g**: 83%;  $^1\text{H}$  NMR (500 MHz,  $\text{MeCN-d}_3$ ):  $\delta$  10.31 (d,  $J = 3.7$  Hz, 1H), 9.04 (dt,  $J = 8.3$  Hz,  $J = 1.7$  Hz, 1H), 8.57 (d,  $J = 8.1$  Hz, 1H), 8.31 (ddd,  $J = 12.9$  Hz,  $J = 7.3$  Hz,  $J = 0.9$  Hz, 1H), 8.14 (dd,  $J = 8.4$  Hz,  $J = 5.3$  Hz, 1H), 8.00 (td,  $J = 7.8$  Hz,  $J = 2.4$  Hz, 1H), 7.78-7.74 (m, 2H), 7.59-7.50 (m, 8H), 7.11 (t,  $J = 7.2$  Hz, 1H), 7.03 (t,  $J = 7.6$  Hz, 2H), 6.99-6.97 (m, 2H);  $^{13}\text{C}$  NMR (125 MHz,  $\text{MeCN-d}_3$ ):  $\delta$  155.3 (d), 150.3 (s, d:  $J_{\text{C-P}} = 13.6$  Hz), 144.5 (d, d:  $J_{\text{C-P}} = 1.5$  Hz), 141.9 (d, d:  $J_{\text{C-P}} = 1.7$  Hz), 136.8 (d, d:  $J_{\text{C-P}} = 2.8$  Hz), 135.7 (d, d:  $J_{\text{C-P}} = 3.4$  Hz), 135.3 (d, d:  $J_{\text{C-P}} = 11.9$  Hz), 134.0 (d, d:  $J_{\text{C-P}} = 2.3$  Hz), 133.1 (s, d:  $J_{\text{C-P}} = 8.9$  Hz), 132.2 (s, d:  $J_{\text{C-P}} = 8.9$  Hz), 131.0 (d, d:  $J_{\text{C-P}} = 14.9$  Hz), 133.1 (d, d:  $J_{\text{C-P}} = 10.9$  Hz), 130.8 (d, d:  $J_{\text{C-P}} = 10.1$  Hz), 128.2 (d), 126.7 (s, d:  $J_{\text{C-P}} = 64.3$  Hz), 126.1 (d), 121.3 (s, d:  $J_{\text{C-P}} = 72.5$  Hz);  $^{31}\text{P}$  NMR (202.5 MHz,  $\text{MeCN-d}_3$ ):  $\delta$  36.42;  $^{19}\text{F}$  NMR (470.6 MHz,  $\text{MeCN-d}_3$ ):  $\delta$  -151.6 (s), -151.7 (s); IR (ATR)  $\nu$  3071, 1590, 1563, 1500, 1476, 1437, 1381, 1315, 1286, 1233, 1215, 1192, 1163, 1100, 1052, 994, 862, 837, 804, 778, 755, 735, 708, 691  $\text{cm}^{-1}$ ; HRMS (ESI) for  $\text{C}_{27}\text{H}_{21}\text{AuBrNP}^+ (\text{M-BF}_4)^+$ : 666.0255; Found: 666.0253; Elem. Anal. Calcd. For  $\text{C}_{27}\text{H}_{21}\text{AuBrF}_4\text{NP}$ : C, 43.00; H, 2.81; N, 1.86; Found: C, 43.19; H, 3.07; N, 1.66.

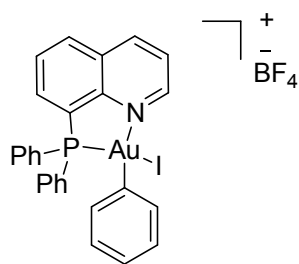

Gold (III) complex **5h**: 55%;  $^1\text{H}$  NMR (500 MHz,  $\text{MeCN-d}_3$ ):  $\delta$  10.61 (s, 1H), 9.04 (dt,  $J = 8.4$  Hz,  $J = 1.6$  Hz, 1H), 8.55 (d,  $J = 8.1$  Hz, 1H), 8.29 (ddd,  $J = 12.5$  Hz,  $J = 7.3$  Hz,  $J = 0.9$  Hz, 1H), 8.08 (dd,  $J = 8.4$  Hz,  $J = 5.3$  Hz, 1H), 7.98 (td,  $J = 7.8$  Hz,  $J = 2.1$  Hz, 1H), 7.77-7.74 (m, 2H), 7.56-7.48 (m, 8H), 7.04-6.94 (m, 5H);  $^{13}\text{C}$  NMR (125 MHz,  $\text{MeCN-d}_3$ ):  $\delta$  158.9 (d), 150.6 (s, d:  $J_{\text{C-P}} = 14.6$  Hz), 144.5 (d, d:  $J_{\text{C-P}} = 1.5$  Hz), 142.1 (d), 136.8 (d, d:  $J_{\text{C-P}} = 2.7$  Hz), 135.5 (d, d:  $J_{\text{C-P}} = 3.5$  Hz), 135.1 (d, d:  $J_{\text{C-P}} = 11.6$  Hz), 134.9 (d), 132.4 (s, d:  $J_{\text{C-P}} = 8.8$  Hz), 131.0 (d), 130.9 (d), 130.8



(d), 127.8 (d), 126.5 (d), 121.8 (s, d:  $J_{C-P}$  = 69.5 Hz) two quaternary carbon atoms could not be detected due to the poor solubility;  $^{31}\text{P}$  NMR (202.5 MHz, MeCN- $d^3$ ):  $\delta$  29.41;  $^{19}\text{F}$  NMR (470.6 MHz, MeCN- $d^3$ ):  $\delta$  -151.6 (s), -151.7 (s); IR (ATR)  $\nu$  3070, 1592, 1499, 1475, 1437, 1379, 1314, 1286, 1233, 1192, 1162, 1099, 1051, 993, 860, 836, 803, 778, 755, 733, 707, 691  $\text{cm}^{-1}$ ; HRMS (ESI) for  $\text{C}_{27}\text{H}_{21}\text{AuINP}^+$  ( $\text{M-BF}_4$ ) $^+$  : 714.0116; Found : 714.0112; Elem. Anal. Calcd. For  $\text{C}_{27}\text{H}_{21}\text{AuBF}_4\text{INP}$  : C, 40.48; H, 2.64; N, 1.75; Found: C, 40.70; H, 2.80; N, 1.62.

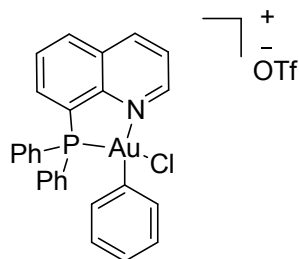

Gold (III) complex **5i**: 78%;  $^1\text{H}$  NMR (500 MHz,  $\text{CDCl}_3$ ):  $\delta$  10.07 (d,  $J$  = 5.1 Hz, 1H), 9.04 (d,  $J$  = 8.3 Hz, 1H), 8.56 (d,  $J$  = 8.1 Hz, 1H), 8.28-8.24 (m, 1H), 8.07-8.01 (m, 2H), 7.71-7.68 (m, 2H), 7.56-7.52 (m, 4H), 7.48-7.44 (m, 4H), 7.09 (t,  $J$  = 7.2 Hz, 1H), 6.99 (t,  $J$  = 7.6 Hz, 2H), 6.93 (d,  $J$  = 8.0 Hz, 2H);  $^{13}\text{C}$  NMR (125 MHz,  $\text{CDCl}_3$ ):  $\delta$  152.8 (d), 149.2 (s, d:  $J_{C-P}$  = 13.2 Hz), 144.3 (d), 141.0 (d, d:  $J_{C-P}$  = 1.9 Hz), 136.4 (d, d:  $J_{C-P}$  = 2.6 Hz), 135.1 (d, d:  $J_{C-P}$  = 3.4 Hz), 134.1 (d, d:  $J_{C-P}$  = 11.9 Hz), 132.5 (d, d:  $J_{C-P}$  = 2.4 Hz), 131.5 (s), 131.4 (s, d:  $J_{C-P}$  = 8.7 Hz), 130.5 (d, m: 3C), 127.7 (d), 124.8 (d), 124.7 (s, d:  $J_{C-P}$  = 66.5 Hz), 120.8 (s, d:  $J_{C-F}$  = 321.5 Hz), 119.9 (s, d:  $J_{C-P}$  = 73.3 Hz);  $^{31}\text{P}$  NMR (202.5 MHz,  $\text{CDCl}_3$ ):  $\delta$  37.97;  $^{19}\text{F}$  NMR (470.6 MHz,  $\text{CDCl}_3$ ):  $\delta$  -78.2 (s); IR (ATR)  $\nu$  2364, 1562, 1503, 1475, 1435, 1384, 1312, 1275, 1257, 1224, 1150, 1100, 1064, 1031, 995, 914, 862, 834, 777, 752, 737, 722, 708, 690, 661  $\text{cm}^{-1}$ ; HRMS (ESI) for  $\text{C}_{27}\text{H}_{21}\text{AuClINP}^+$  ( $\text{M-OTf}$ ) $^+$  : 622.0760; Found : 622.0787; Elem. Anal. Calcd. For  $\text{C}_{28}\text{H}_{21}\text{AuClIF}_3\text{NO}_3\text{PS}$  : C, 43.57; H, 2.74; N, 1.81; Found: C, 43.45; H, 2.64; N, 1.83.

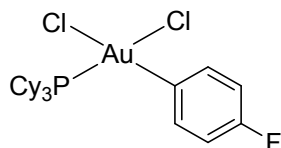

Gold (III) complex **7a**: 73%;  $^1\text{H}$  NMR (300 MHz,  $\text{CDCl}_3$ ):  $\delta$  7.34-7.29 (m, 2H), 6.98 (t,  $J$  = 8.5 Hz, 2H), 2.52 (q,  $J$  = 11.8 Hz, 3H), 1.96-1.66 (m, 21H), 1.29 (q,  $J$  = 12.5 Hz, 3H), 1.11 (q,  $J$  = 12.6 Hz, 6H);  $^{31}\text{P}$  NMR (121.6 MHz,  $\text{CDCl}_3$ ):  $\delta$  48.85;  $^{19}\text{F}$  NMR (282.8 MHz,  $\text{CDCl}_3$ ):  $\delta$  -116.4 (s). <sup>[4]</sup>

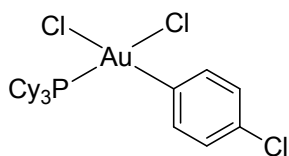

Gold (III) complex **7b**: 72%;  $^1\text{H}$  NMR (400 MHz,  $\text{CDCl}_3$ ):  $\delta$  7.27 (d,  $J = 8.5$  Hz, 2H), 7.18 (d,  $J = 8.5$  Hz, 2H), 2.50 (q,  $J = 12.2$  Hz, 3H), 1.94 (brs, 6H), 1.85-1.82 (m, 6H), 1.74-1.65 (m, 9H), 1.26 (qt,  $J = 13.0$  Hz,  $J = 3.3$  Hz, 3H), 1.09 (q,  $J = 12.9$  Hz, 6H);  $^{13}\text{C}$  NMR (100 MHz,  $\text{CDCl}_3$ ):  $\delta$  140.9 (s), 133.2 (d, d:  $J_{\text{C-P}} = 0.6$  Hz), 132.5 (s), 129.9 (d), 35.4 (d, d:  $J_{\text{C-P}} = 27.0$  Hz), 29.5 (t, d:  $J_{\text{C-P}} = 3.3$  Hz), 27.3 (t, d:  $J_{\text{C-P}} = 12.0$  Hz), 25.8 (t, d:  $J_{\text{C-P}} = 1.3$  Hz);  $^{31}\text{P}$  NMR (121.6 MHz,  $\text{CDCl}_3$ ):  $\delta$  49.07; IR (ATR)  $\nu$  3047, 2934, 2854, 1737, 1556, 1473, 1375, 1298, 1264, 1231, 1208, 1175, 1131, 1117, 1089, 1047, 1005, 920, 895, 848, 833, 805, 736, 703  $\text{cm}^{-1}$ ; HRMS (ESI) for  $\text{C}_{24}\text{H}_{37}\text{AuCl}_3\text{NaP}^+$  ( $\text{M}+\text{Na}$ ) $^+$ : 681.1256; Found: 681.1281; Elem. Anal. Calcd. For  $\text{C}_{24}\text{H}_{37}\text{AuCl}_3\text{P}\cdot\text{CH}_2\text{Cl}_2$ : C, 40.32; H, 5.28; Found: C, 40.62; H, 5.30.

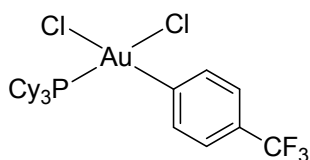

Gold (III) complex **7c**: 77%;  $^1\text{H}$  NMR (400 MHz,  $\text{CDCl}_3$ ):  $\delta$  7.49 (d,  $J = 8.4$  Hz, 2H), 7.44 (d,  $J = 8.4$  Hz, 2H), 2.48 (q,  $J = 12.2$  Hz, 3H), 1.93 (brs, 6H), 1.84-1.81 (m, 6H), 1.74-1.64 (m, 9H), 1.25 (qt,  $J = 13.1$  Hz,  $J = 3.4$  Hz, 3H), 1.06 (q,  $J = 12.9$  Hz, 6H);  $^{13}\text{C}$  NMR (100 MHz,  $\text{CDCl}_3$ ):  $\delta$  147.5 (d), 132.8 (d), 128.8 (d, q:  $J_{\text{C-F}} = 33.0$  Hz), 126.4 (d, q:  $J_{\text{C-F}} = 3.6$  Hz), 123.9 (d, d:  $J_{\text{C-F}} = 272.3$  Hz), 35.5 (d, q:  $J_{\text{C-P}} = 35.4$  Hz), 29.5 (d, q:  $J_{\text{C-P}} = 3.3$  Hz), 27.2 (d, q:  $J_{\text{C-P}} = 12.0$  Hz), 25.8 (d, q:  $J_{\text{C-P}} = 1.2$  Hz);  $^{31}\text{P}$  NMR (162 MHz,  $\text{CDCl}_3$ ):  $\delta$  49.41;  $^{19}\text{F}$  NMR (282.8 MHz,  $\text{CDCl}_3$ ):  $\delta$  -62.6 (s); IR (ATR)  $\nu$  2934, 2854, 1737, 1593, 1492, 1446, 1390, 1321, 1271, 1164, 1119, 1103, 1074, 1054, 1008, 918, 890, 848, 823, 773, 726, 683  $\text{cm}^{-1}$ ; HRMS (ESI) for  $\text{C}_{25}\text{H}_{37}\text{AuCl}_2\text{F}_3\text{NaP}^+$  ( $\text{M}+\text{Na}$ ) $^+$ : 715.1520; Found: 715.1528; Elem. Anal. Calcd. For  $\text{C}_{25}\text{H}_{37}\text{AuCl}_2\text{F}_3\text{P}$ : C, 43.30; H, 5.38; Found: C, 43.20; H, 5.46.

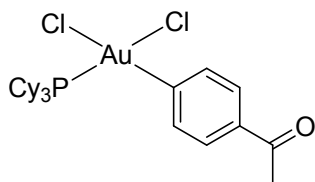

Gold (III) complex **7d**: 72%;  $^1\text{H}$  NMR (500 MHz,  $\text{CDCl}_3$ ):  $\delta$  7.77 (d,  $J = 8.4$  Hz, 2H), 7.48 (d,  $J = 8.2$  Hz, 2H), 2.56 (s, 3H), 2.47 (q,  $J = 12.0$  Hz, 3H), 1.93 (brs, 6H), 1.81-1.79 (m, 6H), 1.71-1.63

(m, 9H), 1.22 (q,  $J = 13.1$  Hz, 3H), 1.03 (q,  $J = 12.8$  Hz, 6H);  $^{13}\text{C}$  NMR (125 MHz,  $\text{CDCl}_3$ ):  $\delta$  197.8 (s), 150.3 (s), 135.4 (s), 132.6 (d), 129.6 (d), 35.5 (d, d:  $J_{\text{C-P}} = 27.0$  Hz), 29.6 (t, d:  $J_{\text{C-P}} = 3.3$  Hz), 27.3 (t, d:  $J_{\text{C-P}} = 12.0$  Hz), 26.8 (q), 25.8 (t, d:  $J_{\text{C-P}} = 1.1$  Hz);  $^{31}\text{P}$  NMR (202.5 MHz,  $\text{CDCl}_3$ ):  $\delta$  49.48; IR (ATR)  $\nu$  2934, 2853, 1737, 1681, 1576, 1485, 1442, 1386, 1363, 1299, 1267, 1231, 1206, 1175, 1128, 1078, 1055, 1007, 958, 916, 896, 849, 824, 735, 719  $\text{cm}^{-1}$ ; HRMS (ESI) for  $\text{C}_{26}\text{H}_{40}\text{AuCl}_2\text{NaOP}^+$  ( $\text{M}+\text{Na}$ ) $^+$  : 689.1752; Found : 689.1778; Elem. Anal. Calcd. For  $\text{C}_{26}\text{H}_{40}\text{AuCl}_2\text{OP} \cdot 1/2\text{CH}_2\text{Cl}_2$  : C, 44.83; H, 5.32; Found: C, 45.36; H, 5.73.

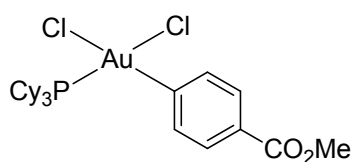

Gold (III) complex **7e**: 68%;  $^1\text{H}$  NMR (400 MHz,  $\text{CDCl}_3$ ):  $\delta$  7.84 (d,  $J = 8.4$  Hz, 2H), 7.43 (d,  $J = 8.2$  Hz, 2H), 3.90 (s, 3H), 2.49 (q,  $J = 12.1$  Hz, 3H), 1.94 (brs, 6H), 1.84-1.81 (m, 6H), 1.74-1.65 (m, 9H), 1.26 (qt,  $J = 13.1$  Hz,  $J = 3.4$  Hz, 3H), 1.06 (q,  $J = 12.8$  Hz, 6H);  $^{13}\text{C}$  NMR (100 MHz,  $\text{CDCl}_3$ ):  $\delta$  166.9 (s), 149.8 (s), 132.5 (d), 132.8 (d), 128.5 (s), 52.4 (q), 35.6 (d, d:  $J_{\text{C-P}} = 26.9$  Hz), 29.6 (t, d:  $J_{\text{C-P}} = 3.3$  Hz), 27.3 (t, d:  $J_{\text{C-P}} = 12.1$  Hz), 25.8 (t, d:  $J_{\text{C-P}} = 0.8$  Hz);  $^{31}\text{P}$  NMR (121.6 MHz,  $\text{CDCl}_3$ ):  $\delta$  48.96; IR (ATR)  $\nu$  2934, 2852, 1718, 1583, 1446, 1432, 1366, 1282, 1231, 1206, 1193, 1176, 1114, 1011, 918, 888, 850, 824, 760, 738, 695  $\text{cm}^{-1}$ ; HRMS (ESI) for  $\text{C}_{26}\text{H}_{40}\text{AuCl}_2\text{NaO}_2\text{P}^+$  ( $\text{M}+\text{Na}$ ) $^+$  : 705.1701; Found : 705.1709; Elem. Anal. Calcd. For  $\text{C}_{26}\text{H}_{40}\text{AuCl}_2\text{O}_2\text{P}$  : C, 45.69; H, 5.90; Found: C, 46.15; H, 6.25.

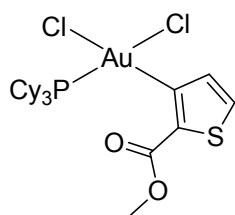

Gold (III) complex **7f**: 40%;  $^1\text{H}$  NMR (300 MHz,  $\text{CDCl}_3$ ):  $\delta$  7.57 (d,  $J = 4.6$  Hz, 1H), 7.04 (d,  $J = 4.6$  Hz, 1H), 3.89 (s, 3H), 2.43 (q,  $J = 11.3$  Hz, 3H), 2.09 (brs, 6H), 1.83-1.64 (m, 18H), 1.29-0.99 (m, 9H);  $^{13}\text{C}$  NMR (150 MHz,  $\text{CDCl}_3$ ):  $\delta$  163.6 (s), 140.4 (s), 132.6 (d), 130.6 (d), 129.2 (s), 52.6 (q), 35.5 (d, d:  $J_{\text{C-P}} = 27.2$  Hz), 30.0 (t, d:  $J_{\text{C-P}} = 2.3$  Hz), 28.8 (t, d:  $J_{\text{C-P}} = 2.9$  Hz), 27.5 (t, d:  $J_{\text{C-P}} = 12.5$  Hz), 27.4 (t, d:  $J_{\text{C-P}} = 11.7$  Hz), 25.8 (t);  $^{31}\text{P}$  NMR (243 MHz,  $\text{CDCl}_3$ ):  $\delta$  50.36; IR (ATR)  $\nu$  3093, 2928, 2851, 1707, 1492, 1435, 1401, 1345, 1301, 1240, 1180, 1128, 1093, 1069, 1003, 969, 891, 870, 849, 787, 767, 730  $\text{cm}^{-1}$ ;

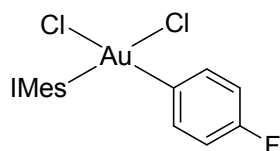

Gold (III) complex **8**: 58%;  $^1\text{H}$  NMR (500 MHz,  $\text{CDCl}_3$ ):  $\delta$  7.18 (s, 2H), 7.12 (s, 2H), 6.97 (s, 2H), 6.69 (t,  $J = 8.9$  Hz, 2H), 6.49 (dd,  $J = 8.6$  Hz,  $J = 5.8$  Hz, 2H), 2.47 (s, 6H), 2.42 (s, 6H), 1.61 (s, 6H);  $^{13}\text{C}$  NMR (125 MHz,  $\text{CDCl}_3$ ):  $\delta$  161.6 (s, d:  $J_{\text{C-F}} = 244.4$  Hz), 151.5 (s), 141.2 (s), 136.7 (s), 135.1 (s), 133.1 (d, d:  $J_{\text{C-F}} = 6.9$  Hz), 130.7 (d), 129.2 (d), 128.5 (s, d:  $J_{\text{C-F}} = 2.5$  Hz), 125.1 (d), 115.6 (d, d:  $J_{\text{C-F}} = 20.7$  Hz), 21.3 (q), 19.5 (q), 18.3 (q);  $^{19}\text{F}$  NMR (470.6 MHz,  $\text{CDCl}_3$ ):  $\delta$  -117.5 (s); IR (ATR)  $\nu$  3174, 3163, 3127, 2974, 2957, 2921, 2852, 1745, 1608, 1577, 1481, 1435, 1414, 1379, 1331, 1300, 1219, 1157, 1123, 1090, 1057, 1035, 1008, 964, 928, 854, 817, 769, 736, 706  $\text{cm}^{-1}$ ;

- [1] J. Flapper, H. Kooijman, M. Lutz, A. L. Spek, P. W. N. M. van Leeuwen, C. J. Elsevier, P. C. J. Kamer, *Organometallics* **2009**, *28*, 1180.
- [2] T. Pullmann, B. Engendahl, Z. Zhang, M. Hölscher, A. Zanotti-Gerosa, A. Dyke, G. Franciò, W. Leitner, *Chem. Eur. J* **2010**, *16*, 7517.
- [3] C. Picherit, F. Wagner, D. Uguen, *Tetrahedron Lett.* **2004**, *45*, 2579.
- [4] M. S. Winston, W. J. Wolf, F. D. Toste, *J. Am. Chem. Soc* **2014**, *136*, 7777.

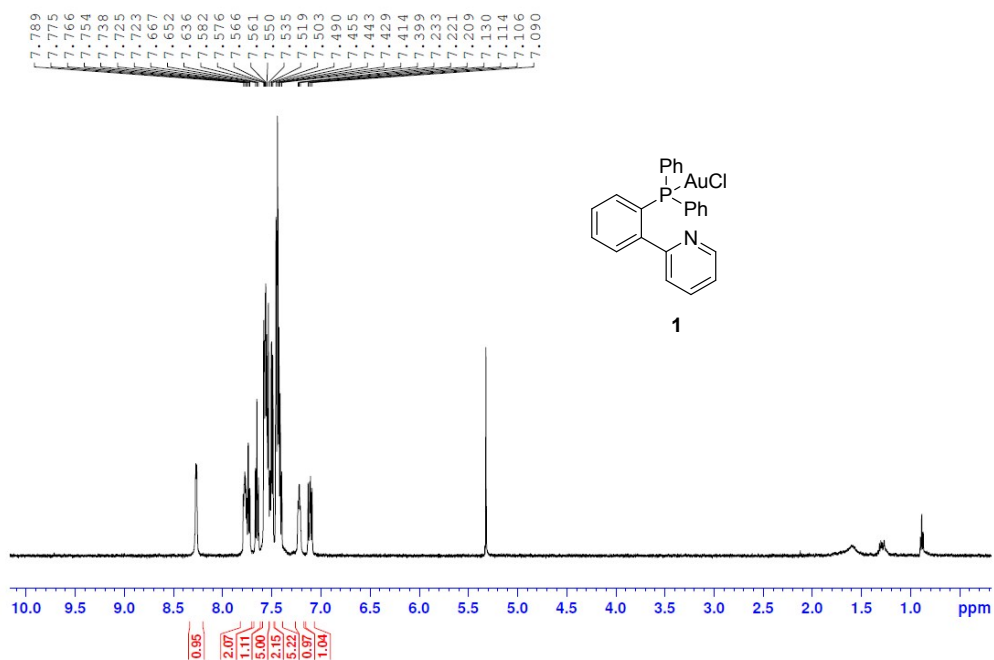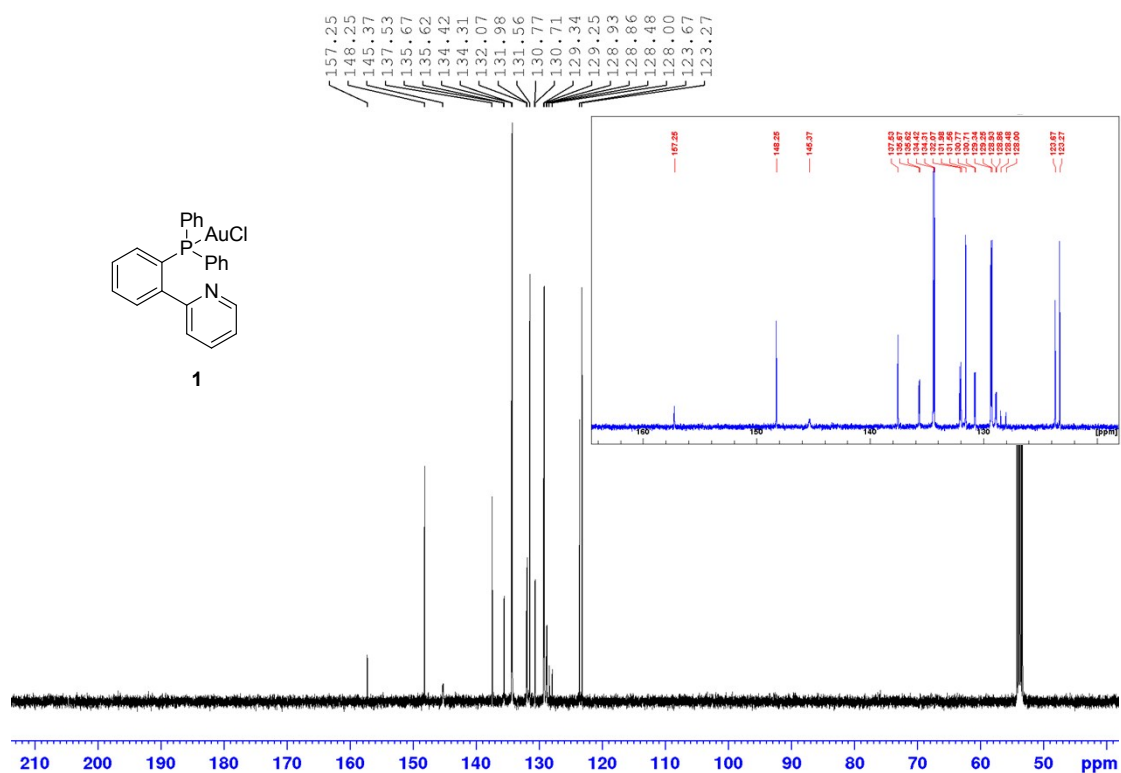

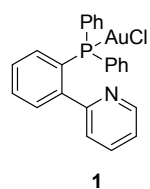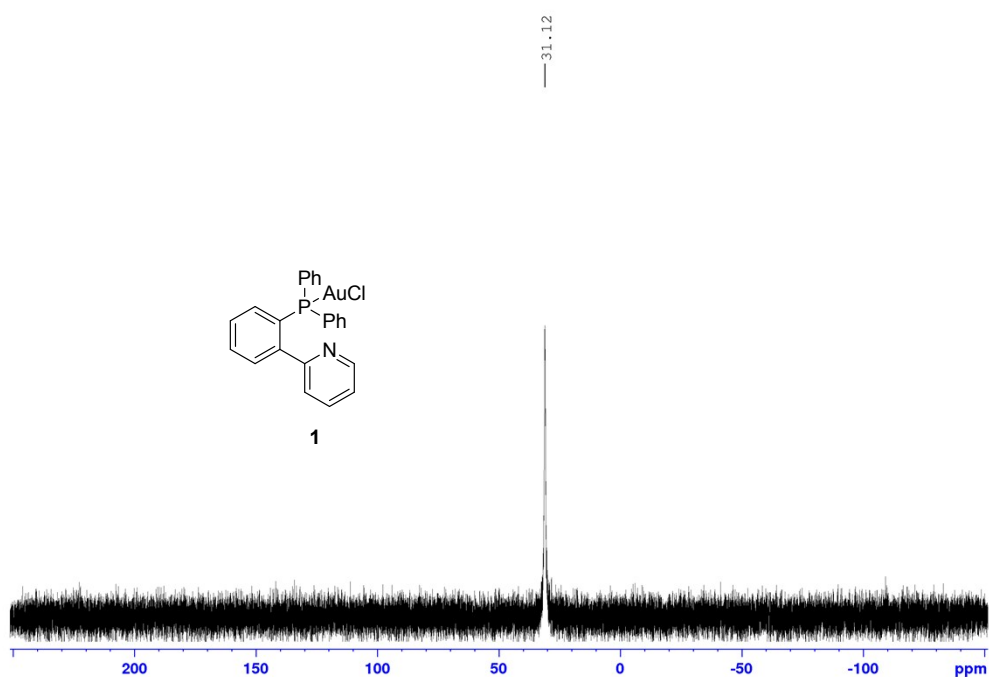

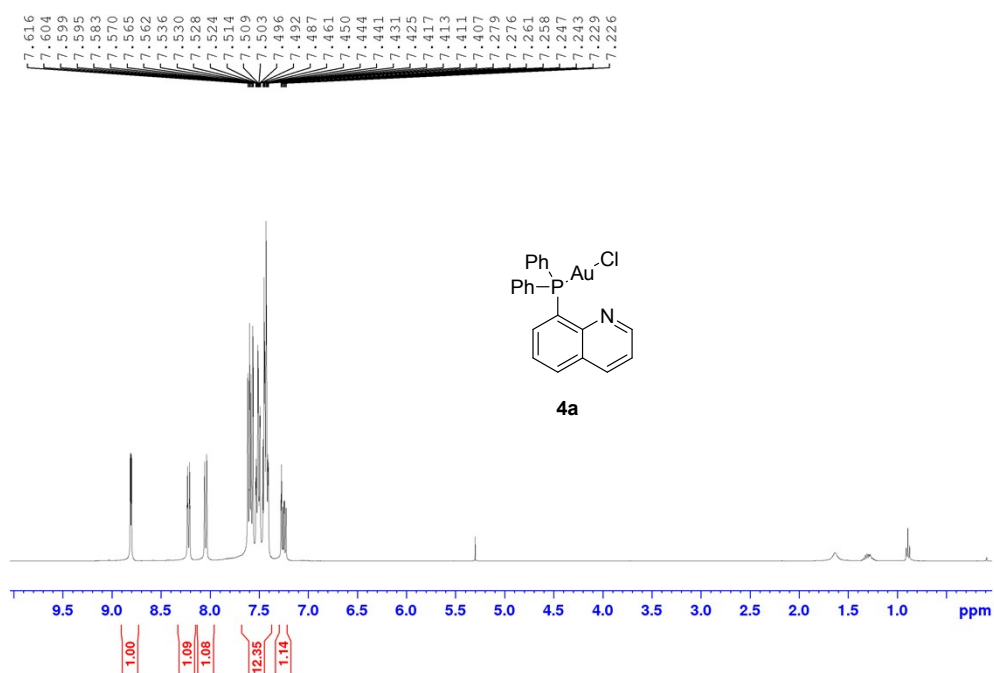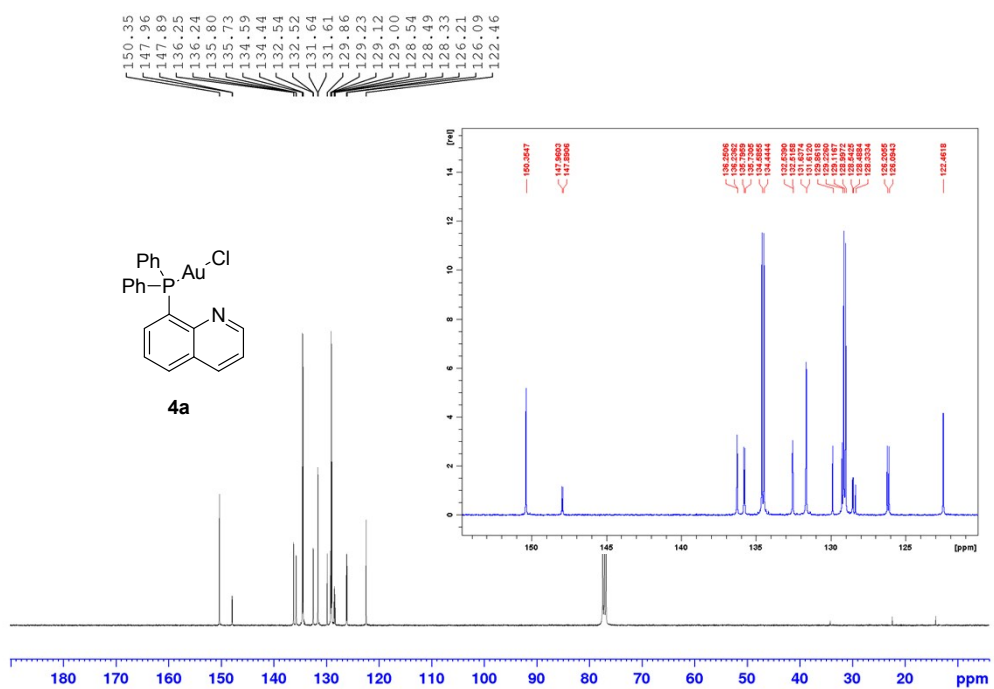

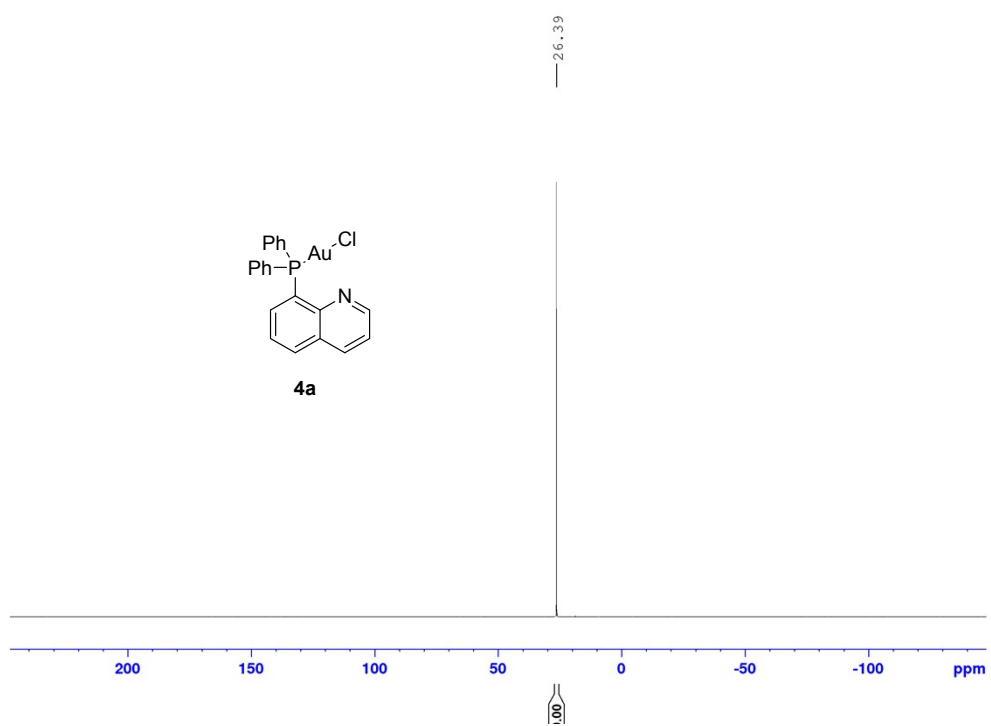



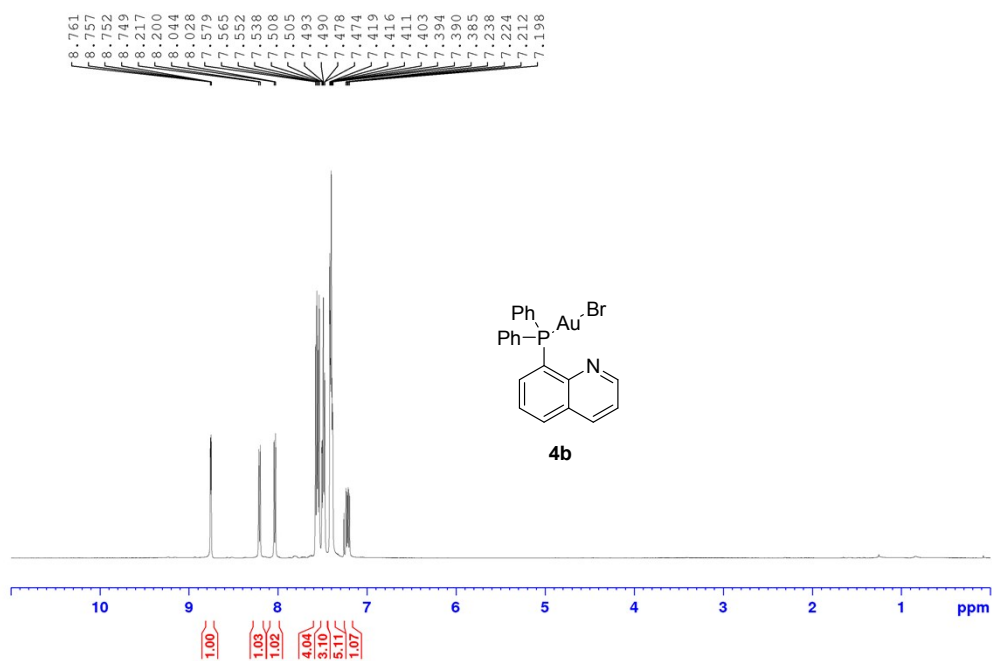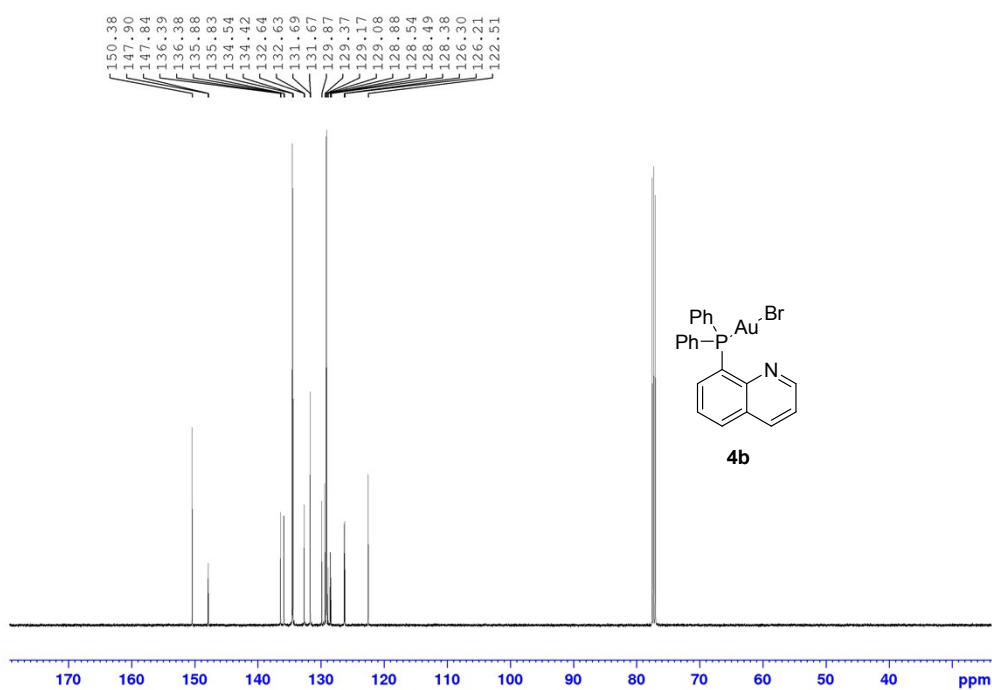

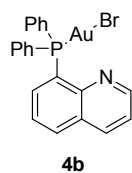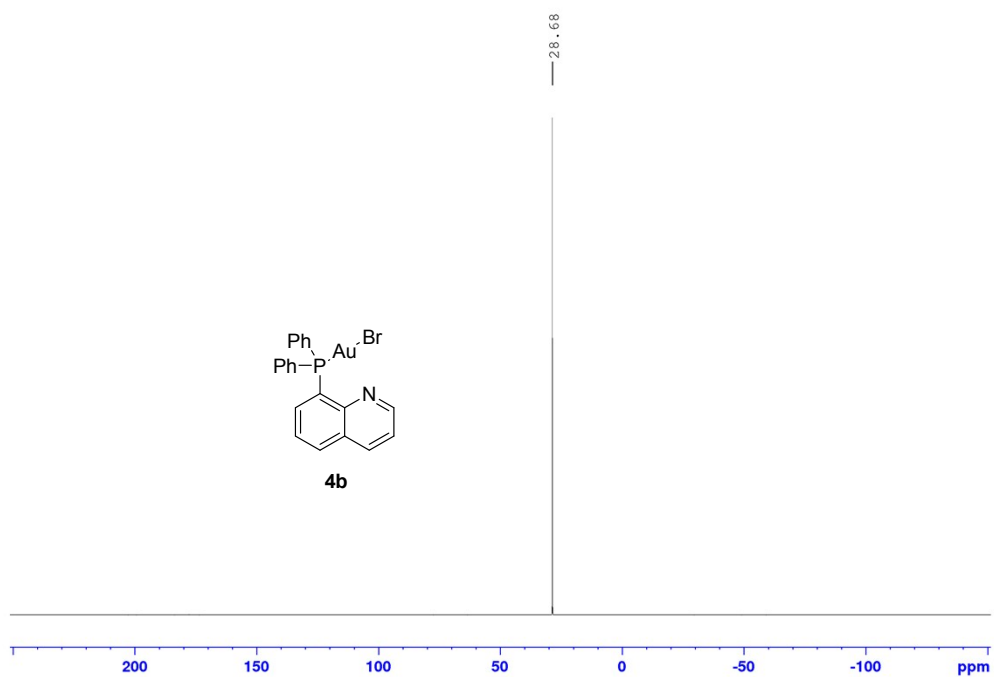

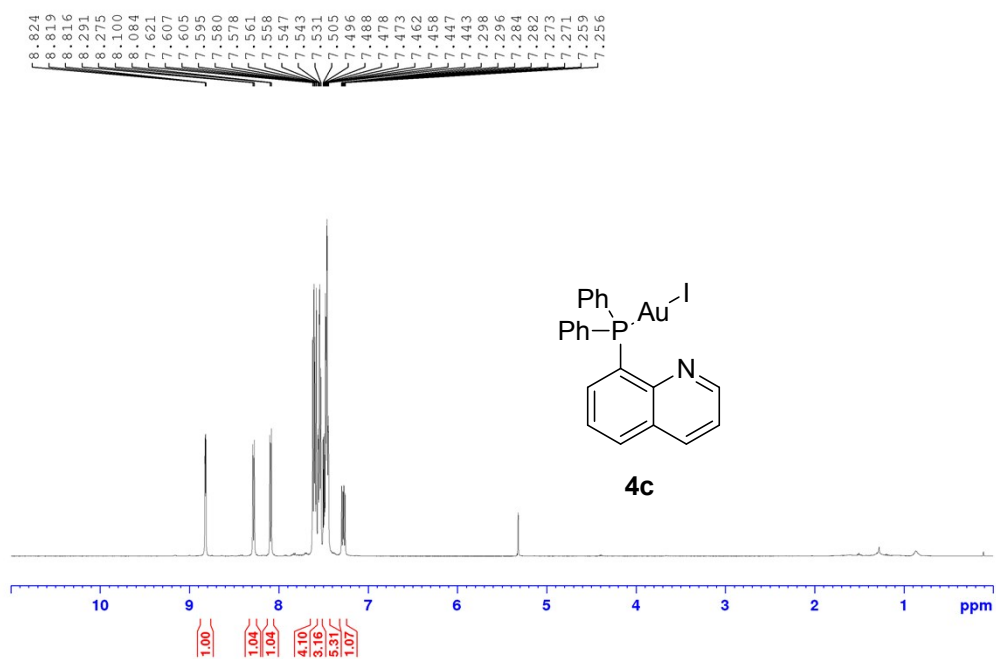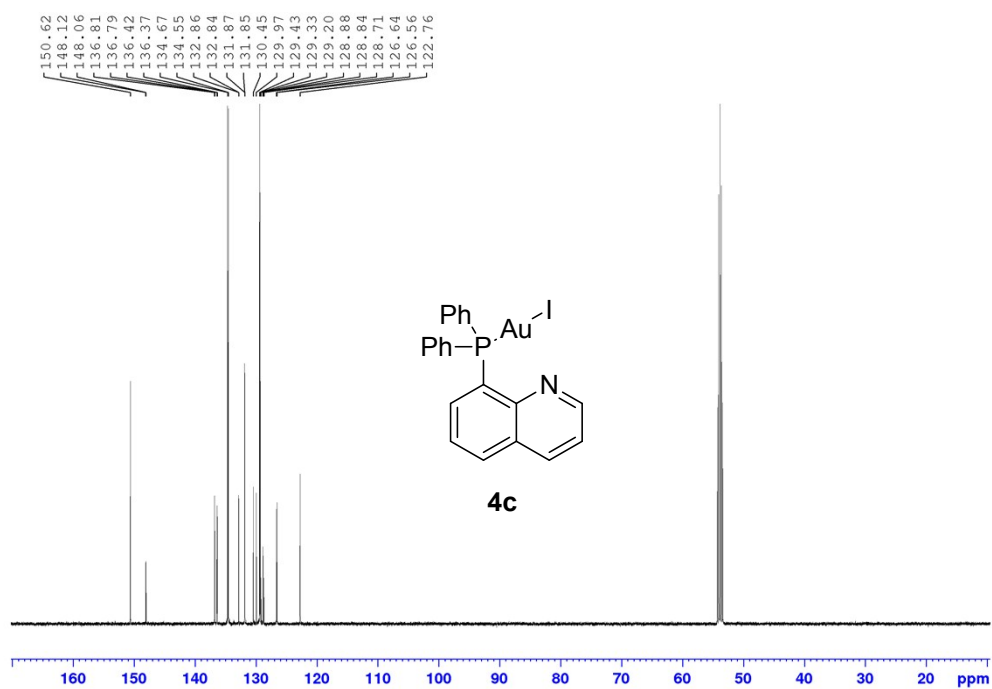

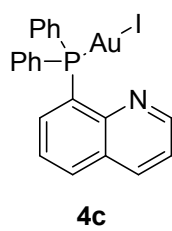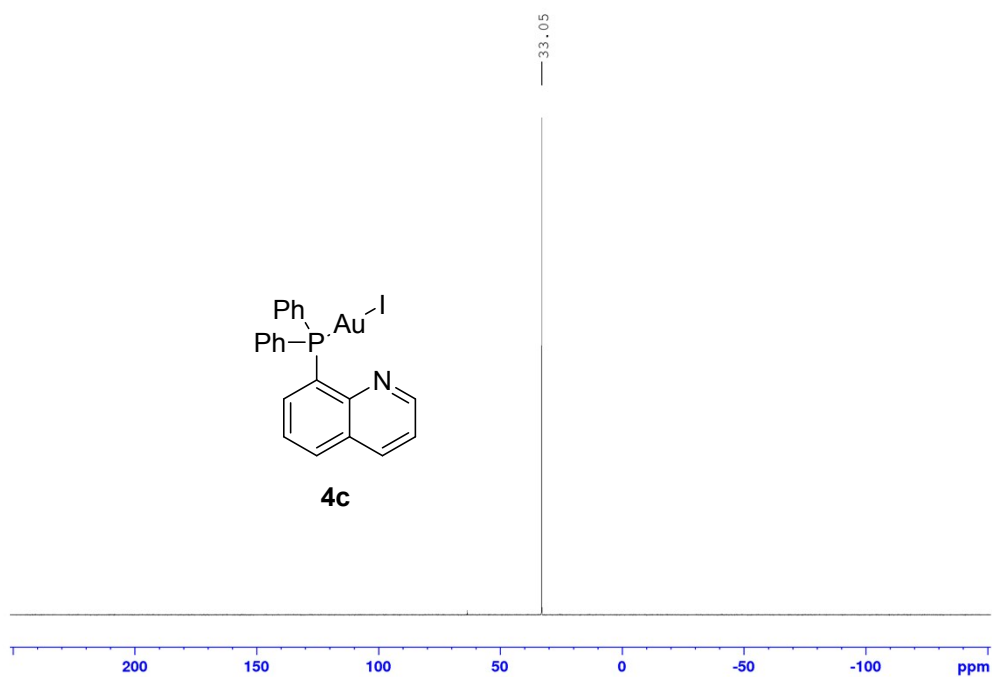

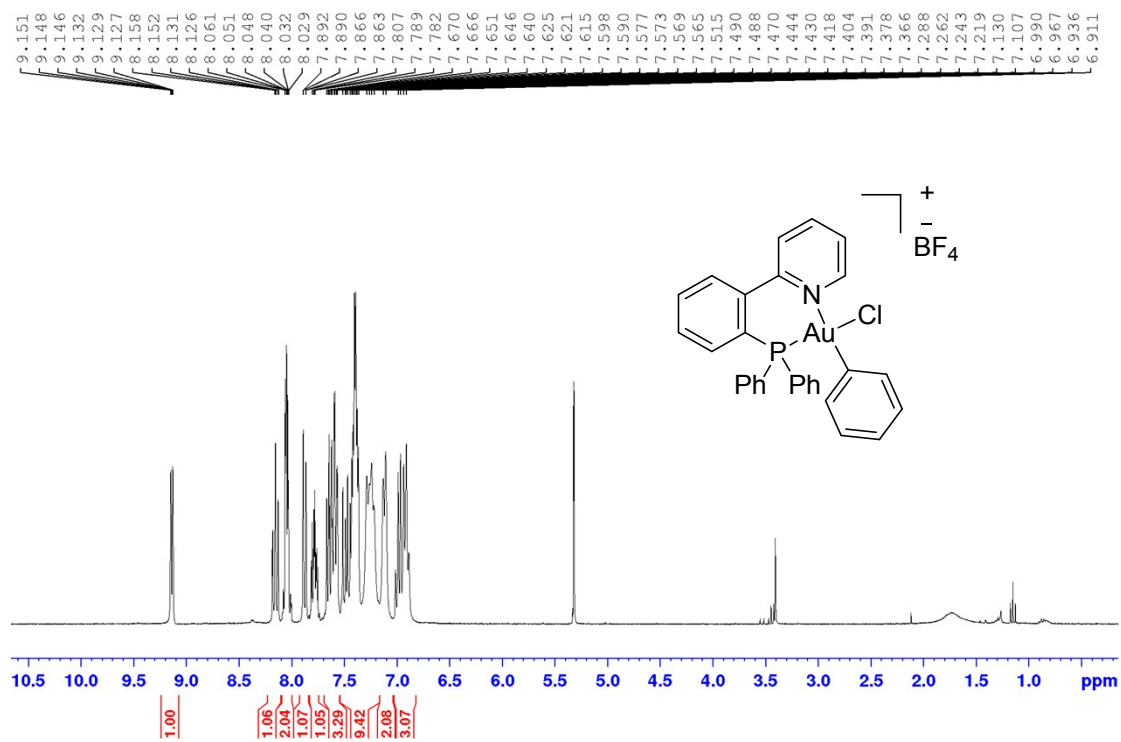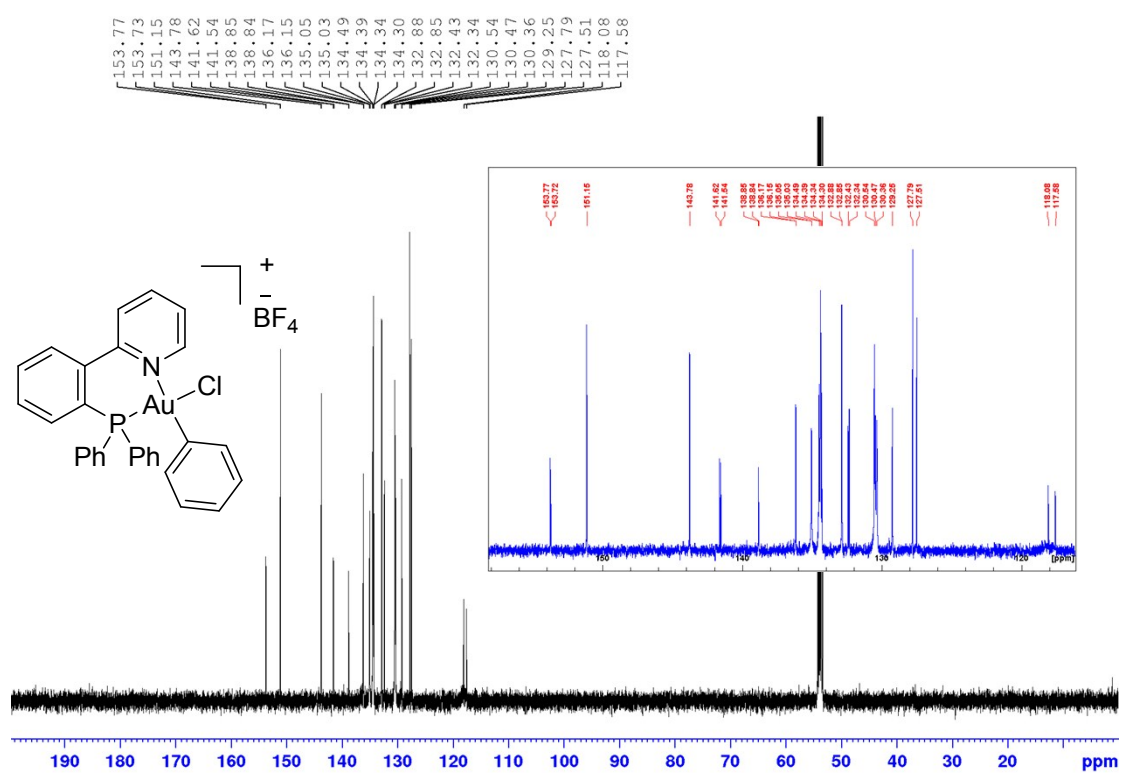

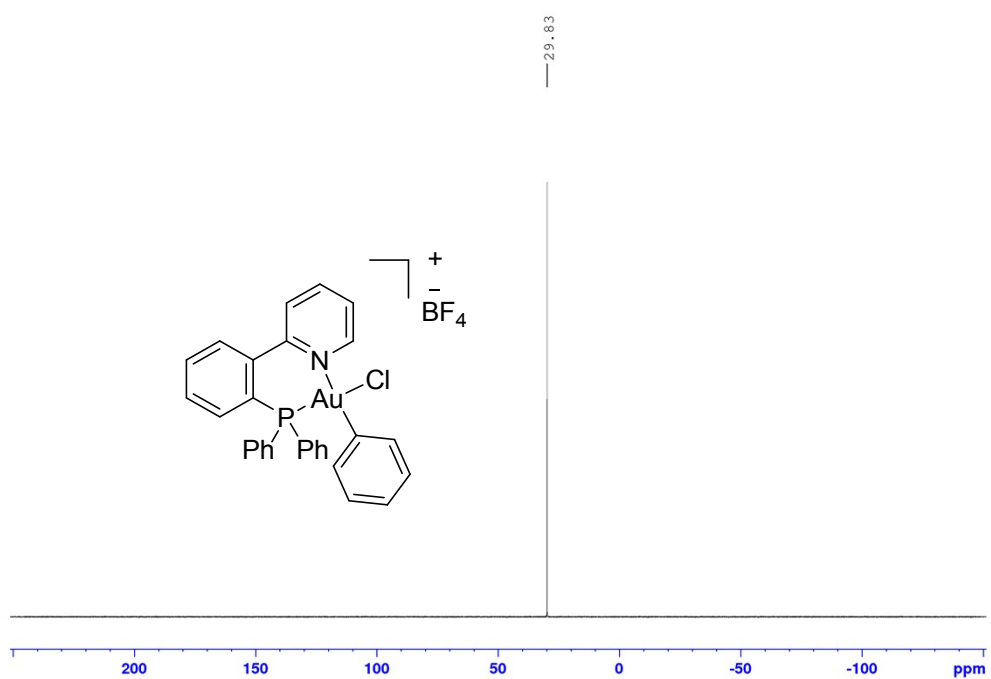

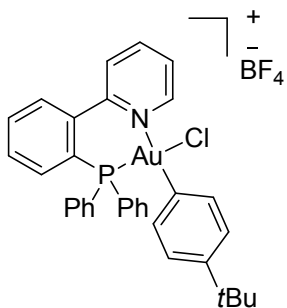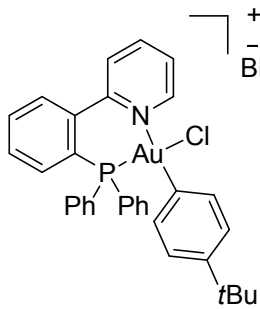

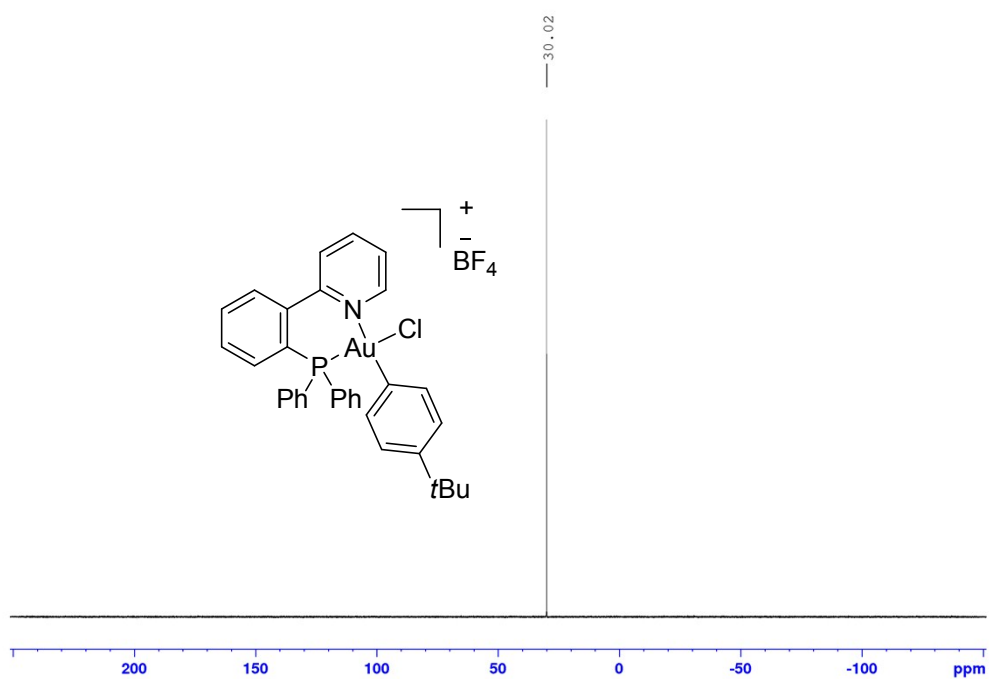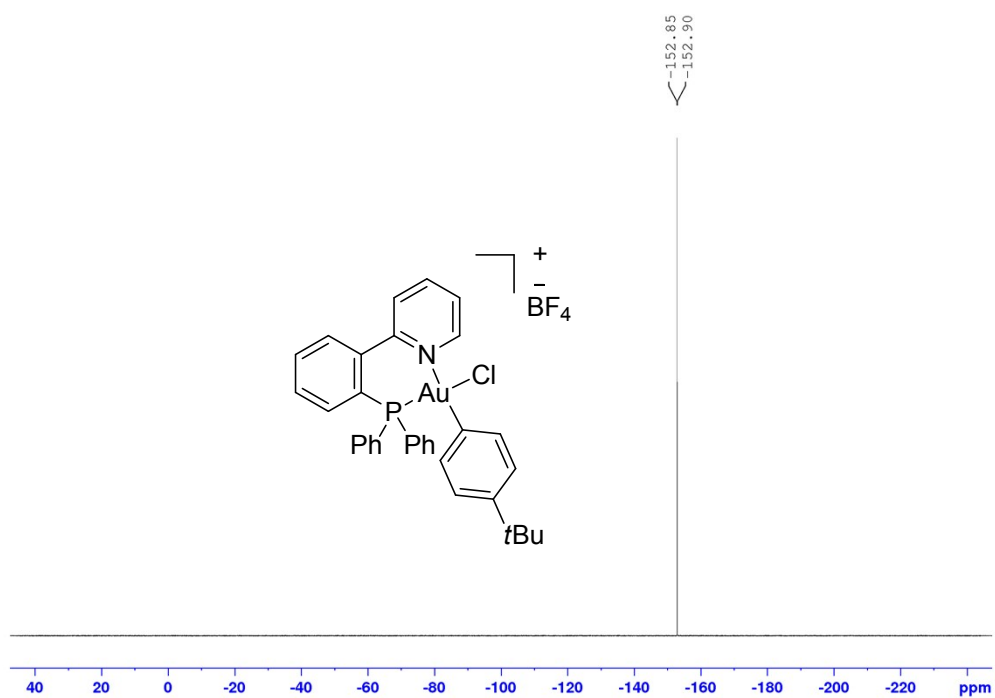



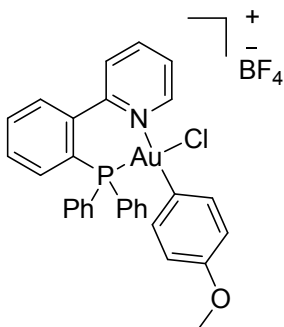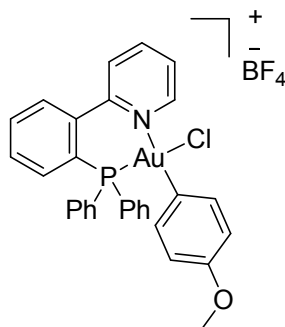

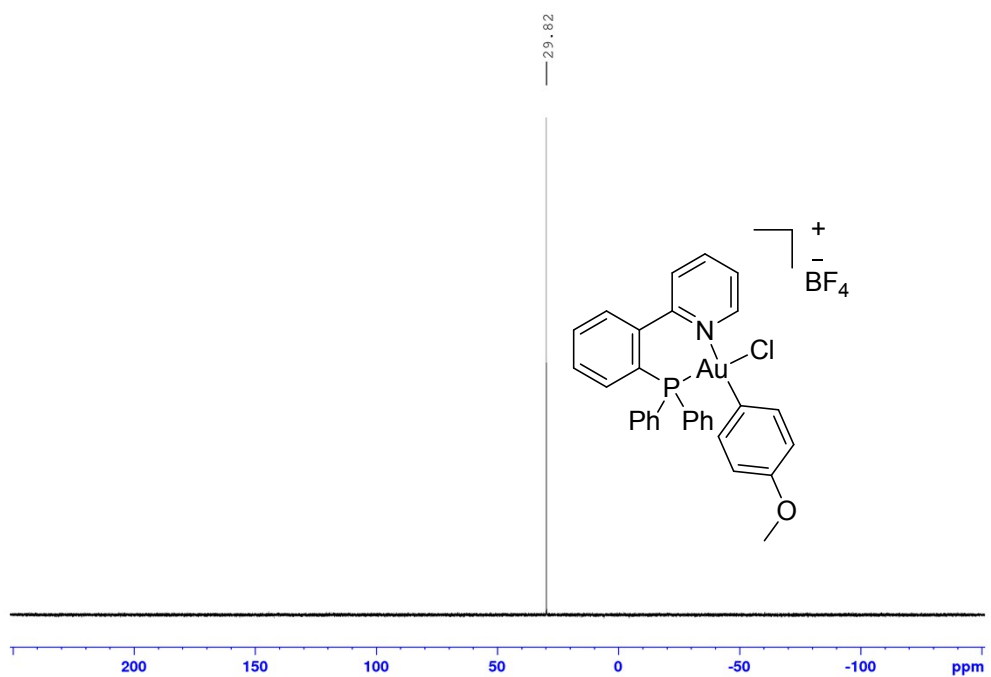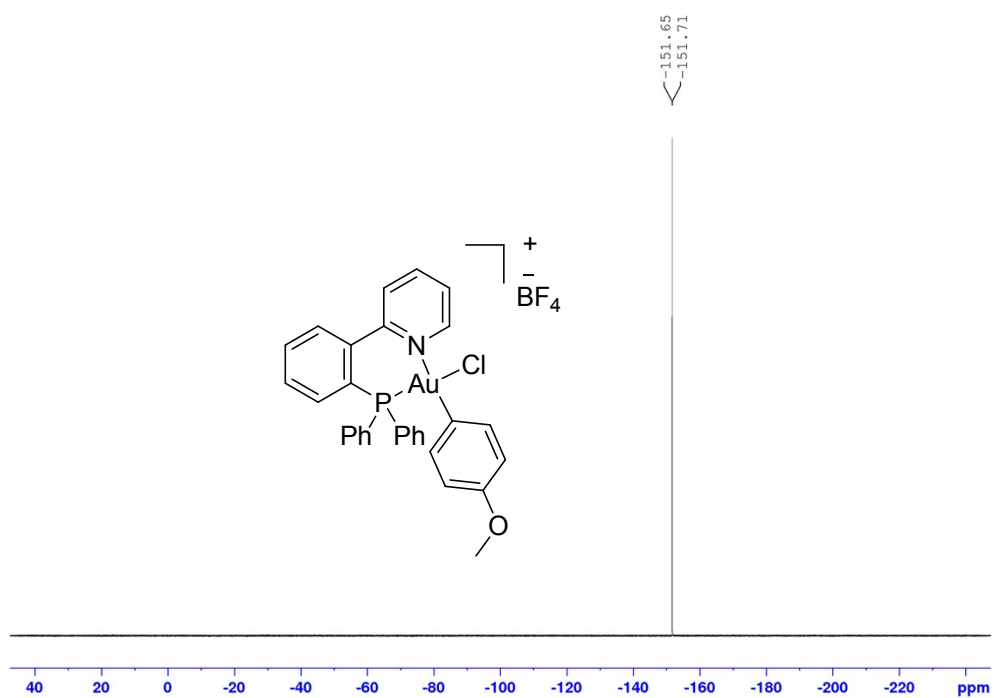

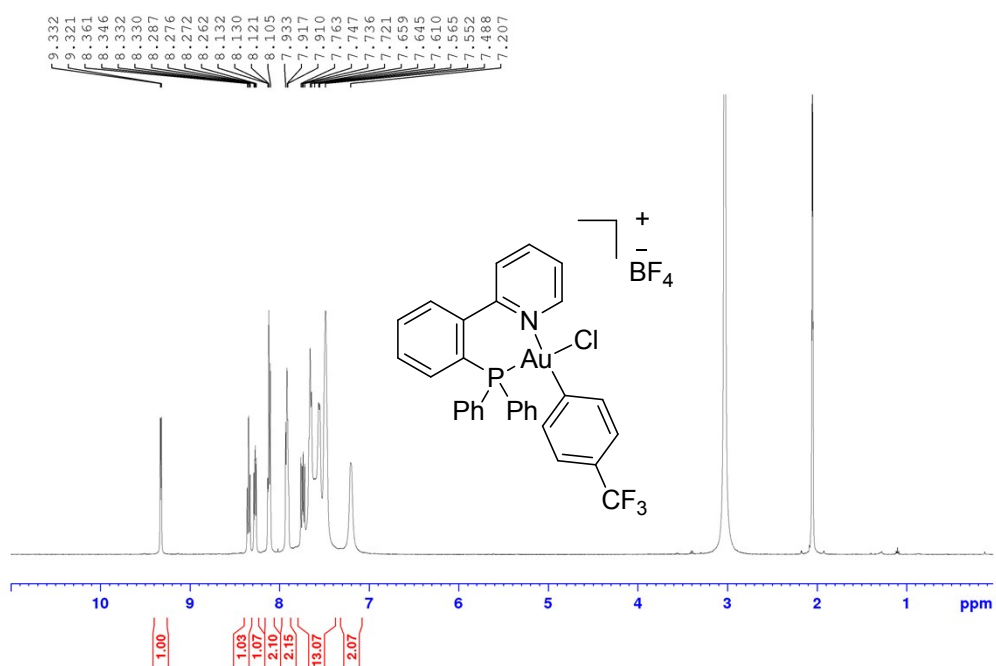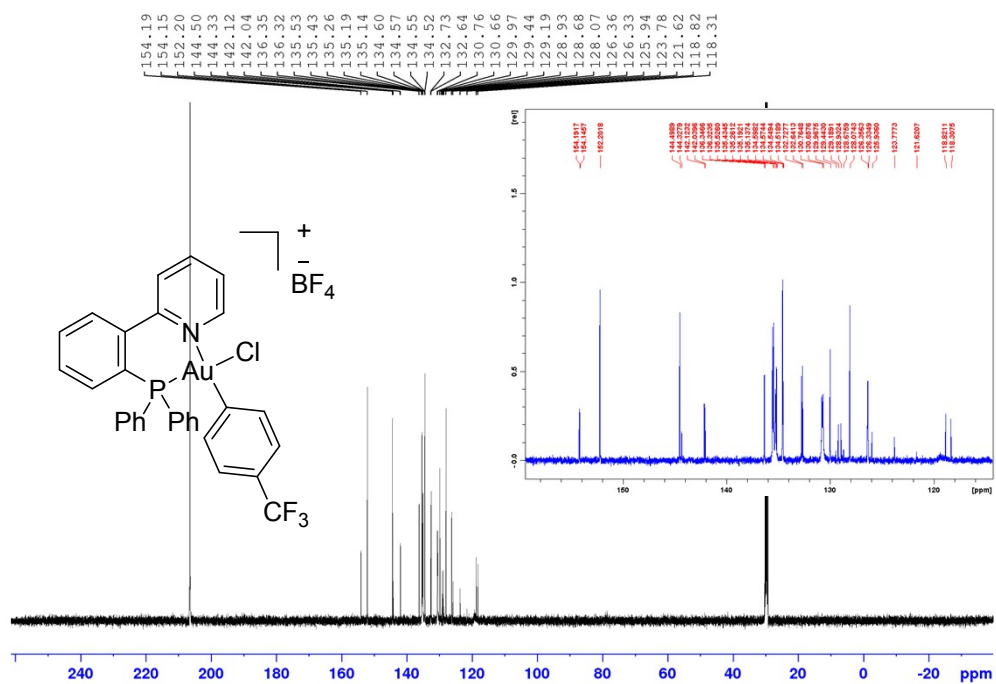

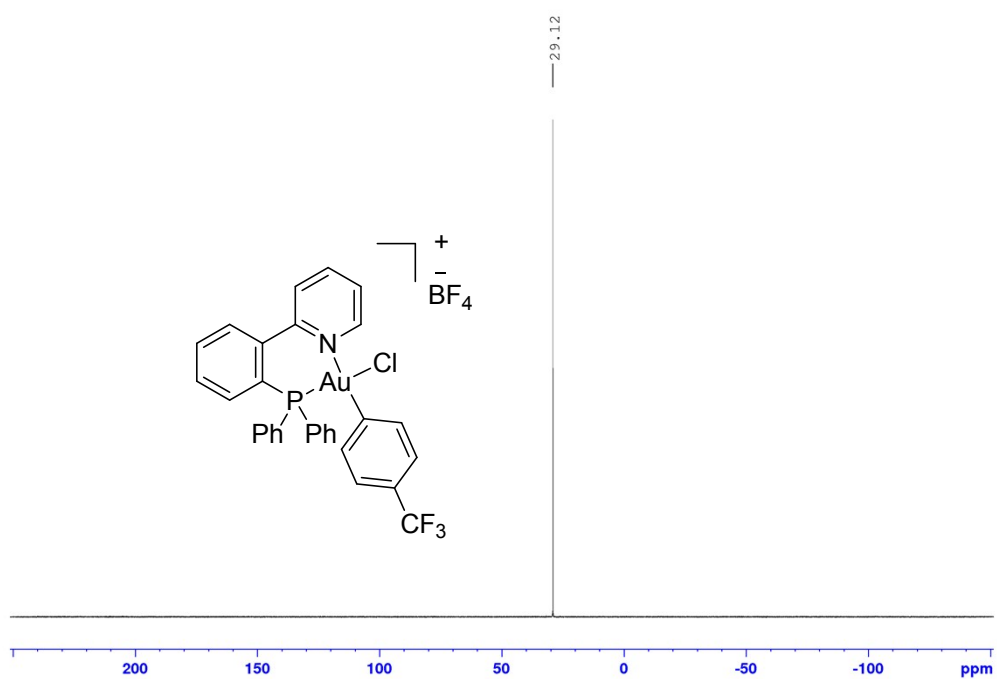

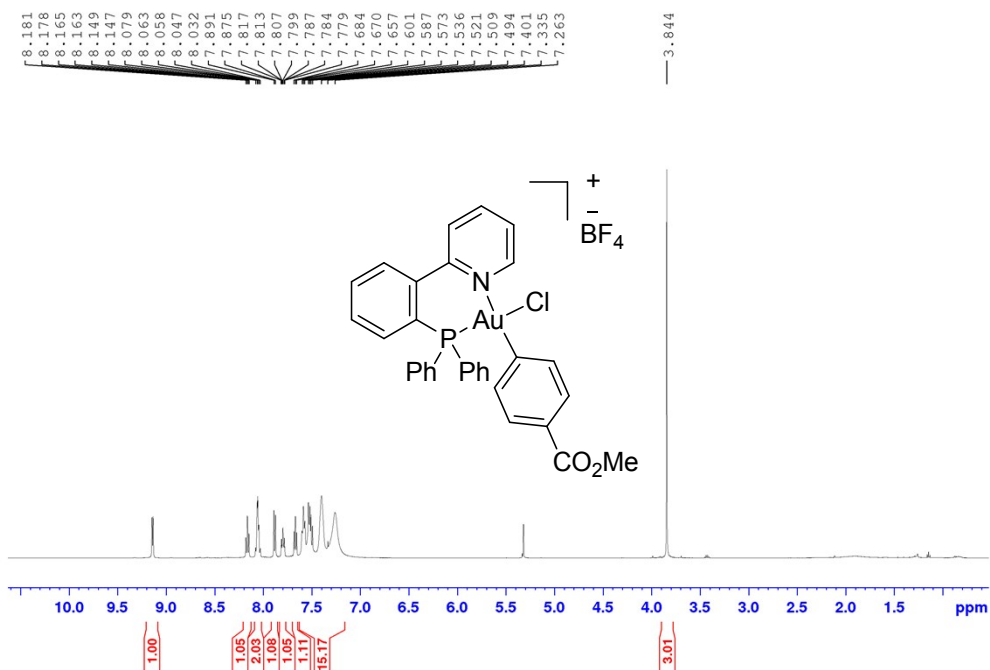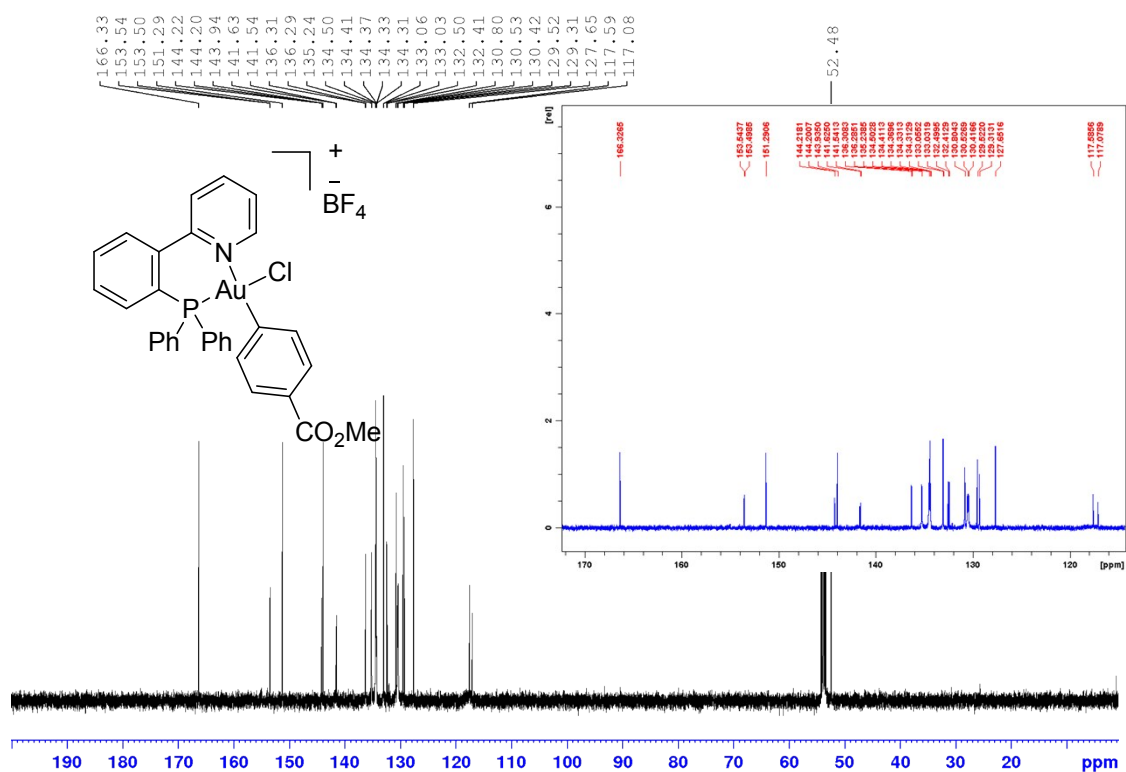

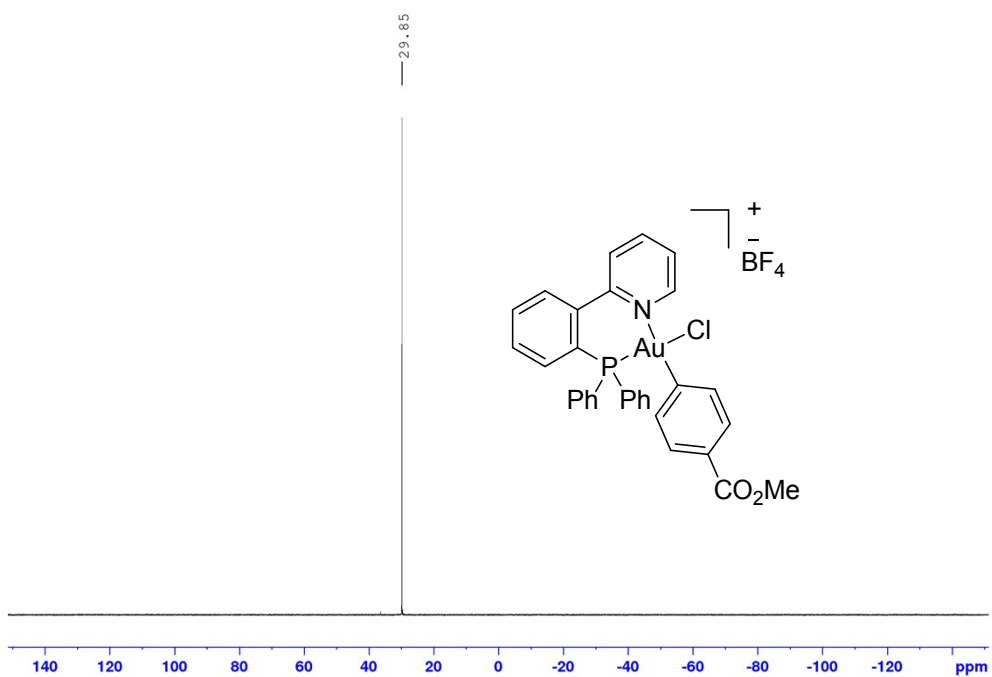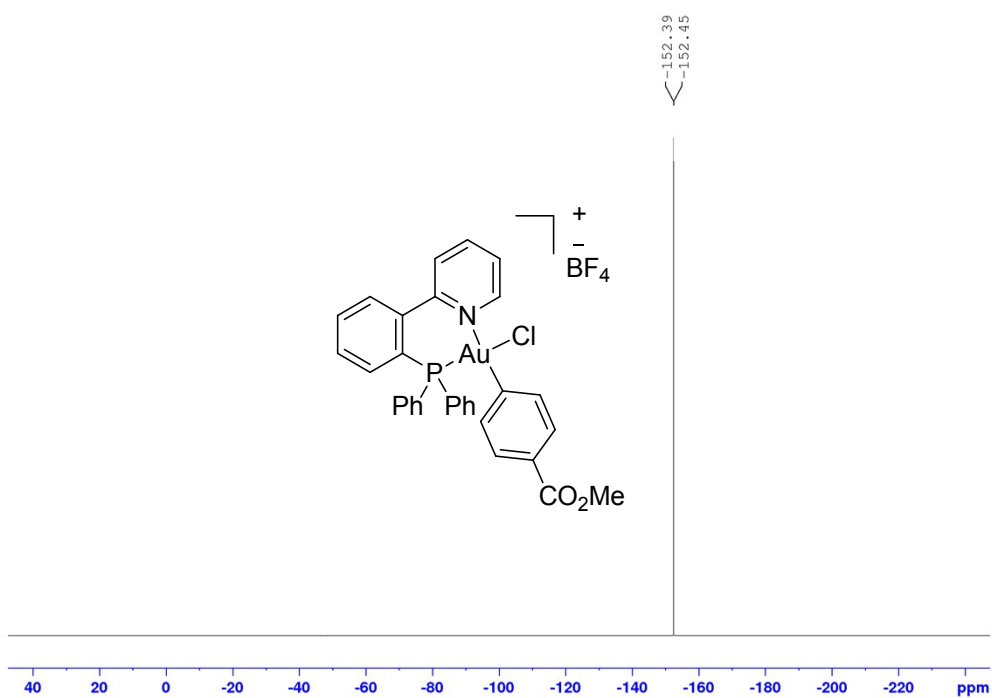

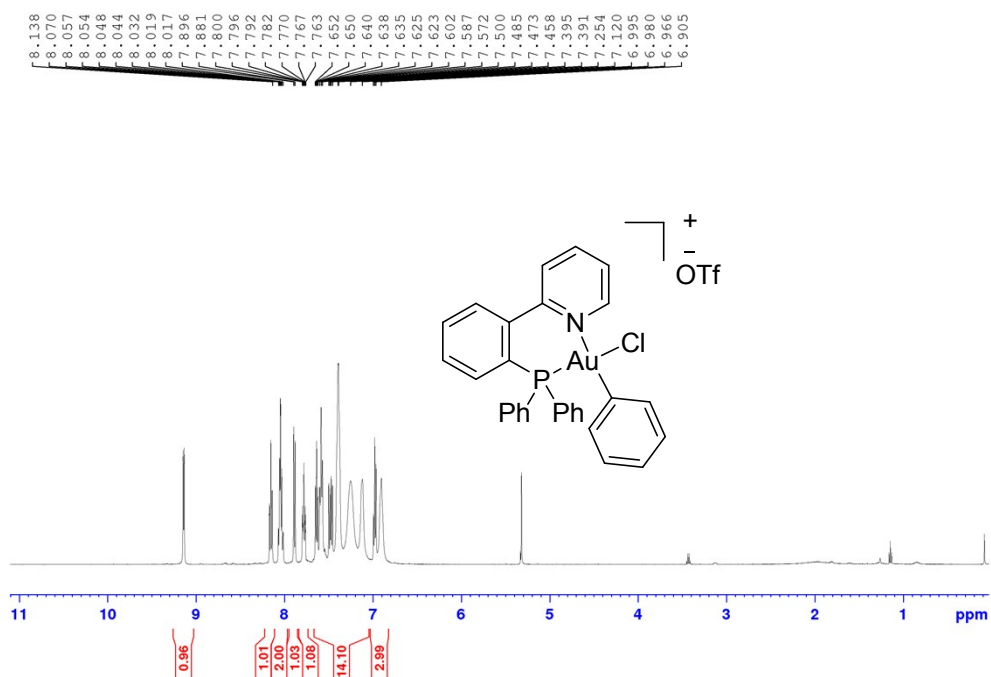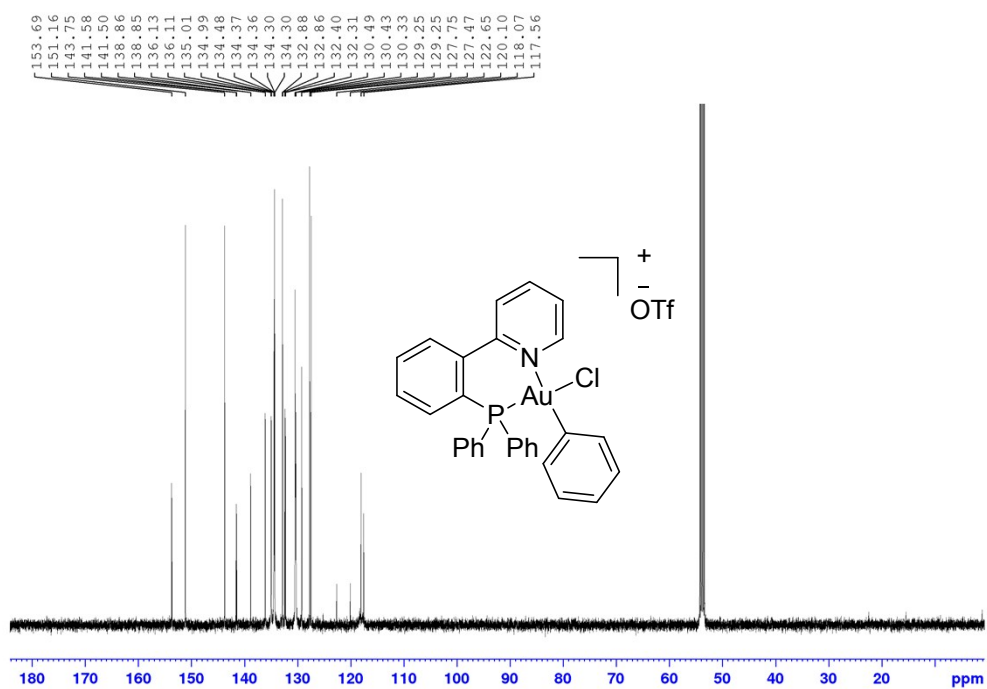

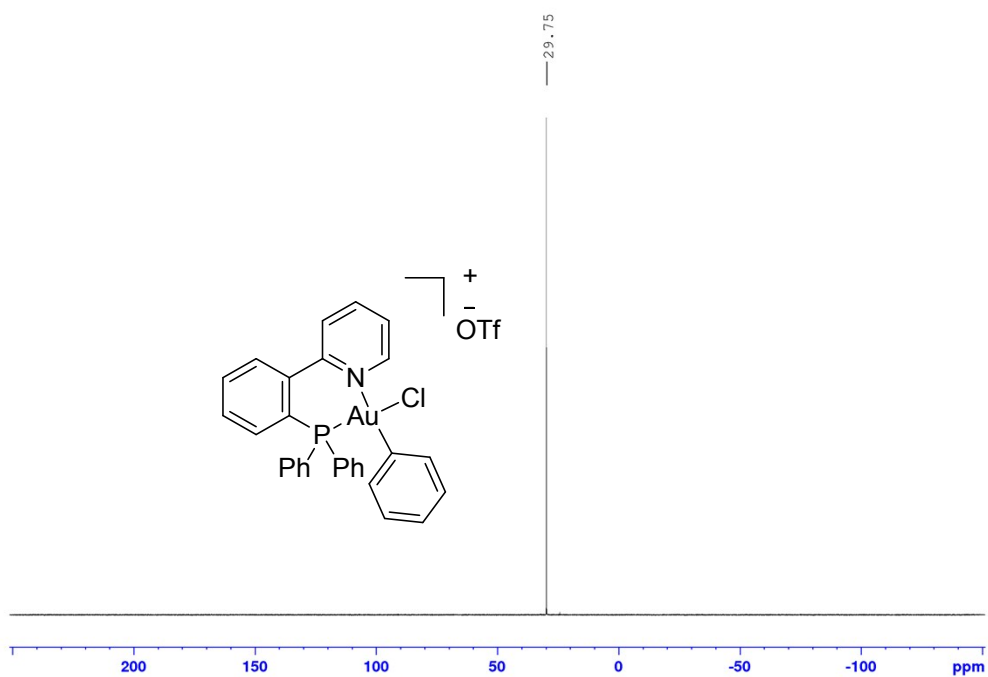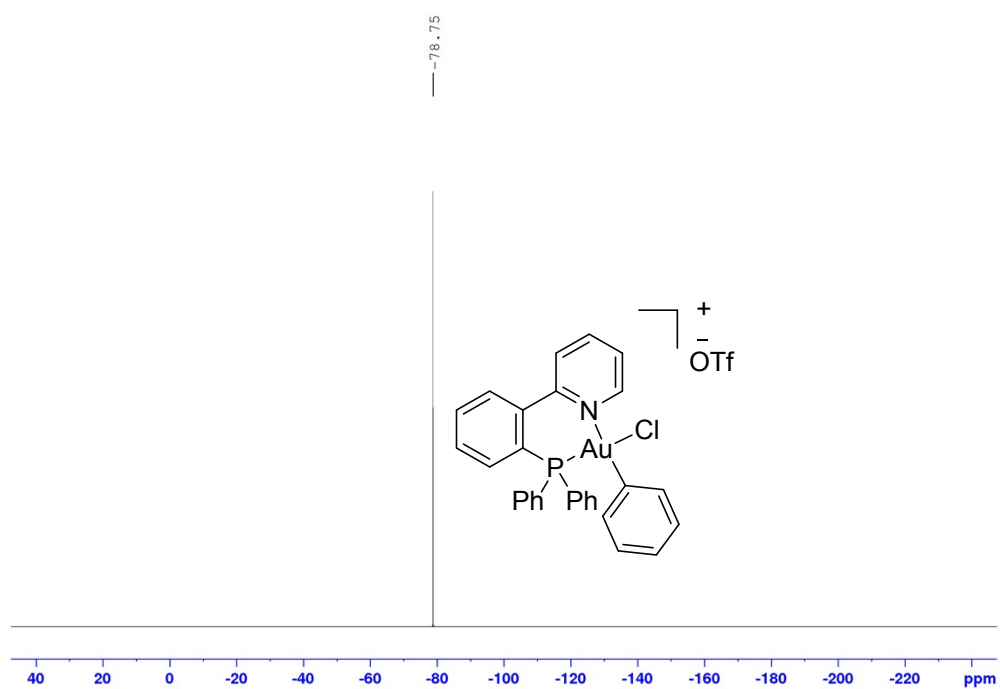



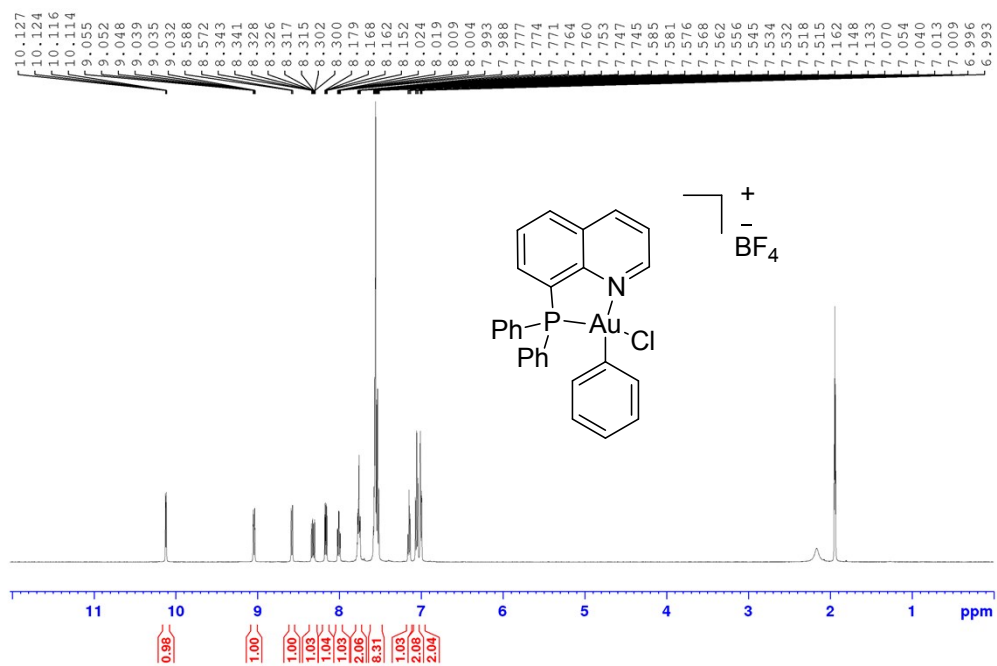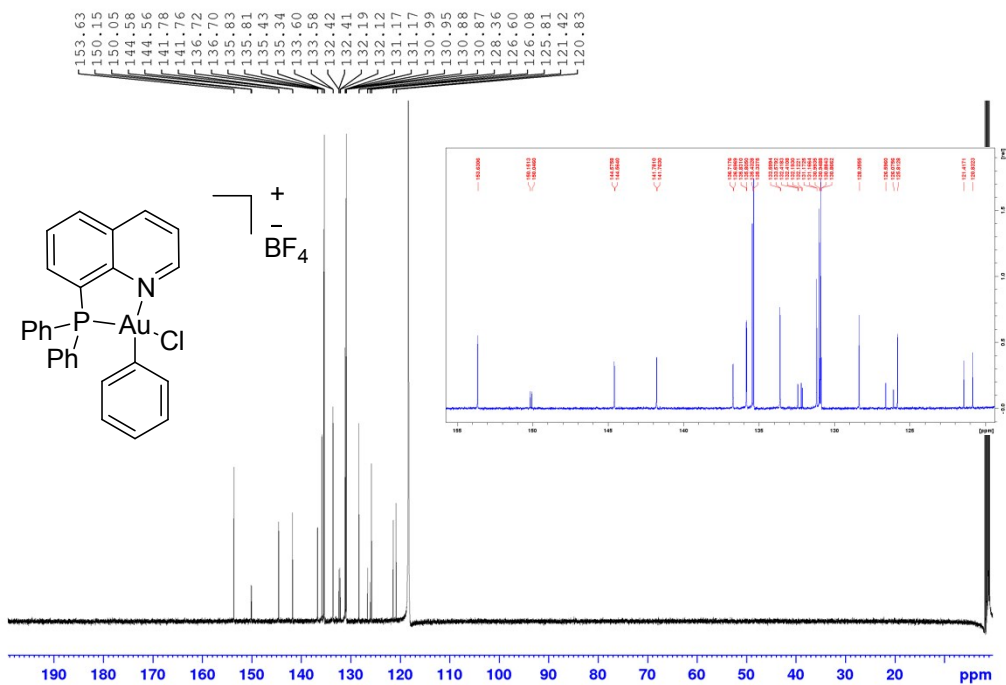

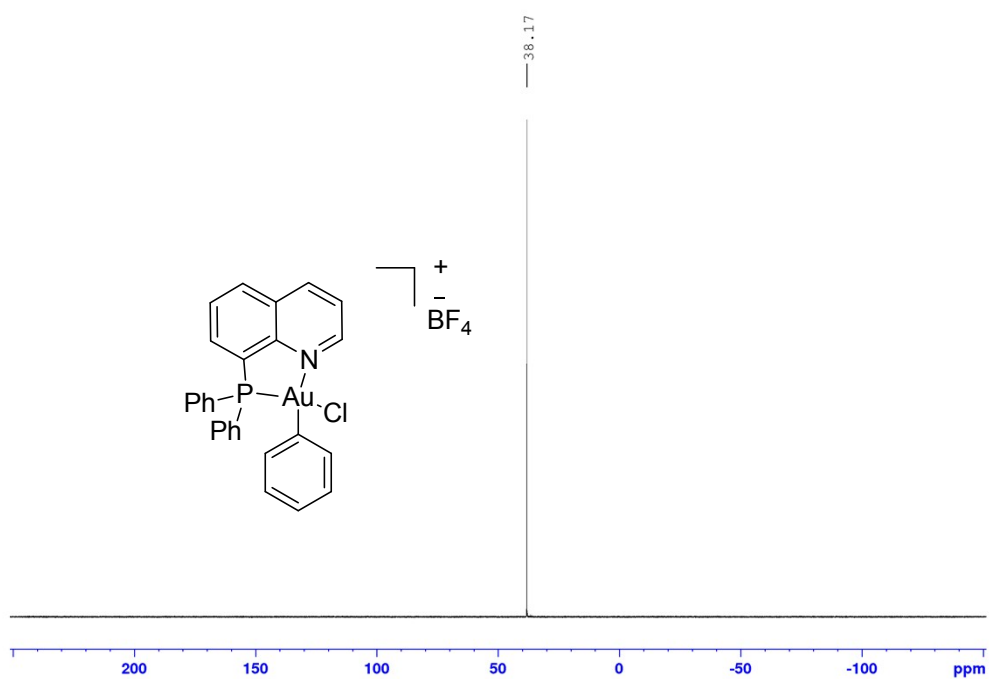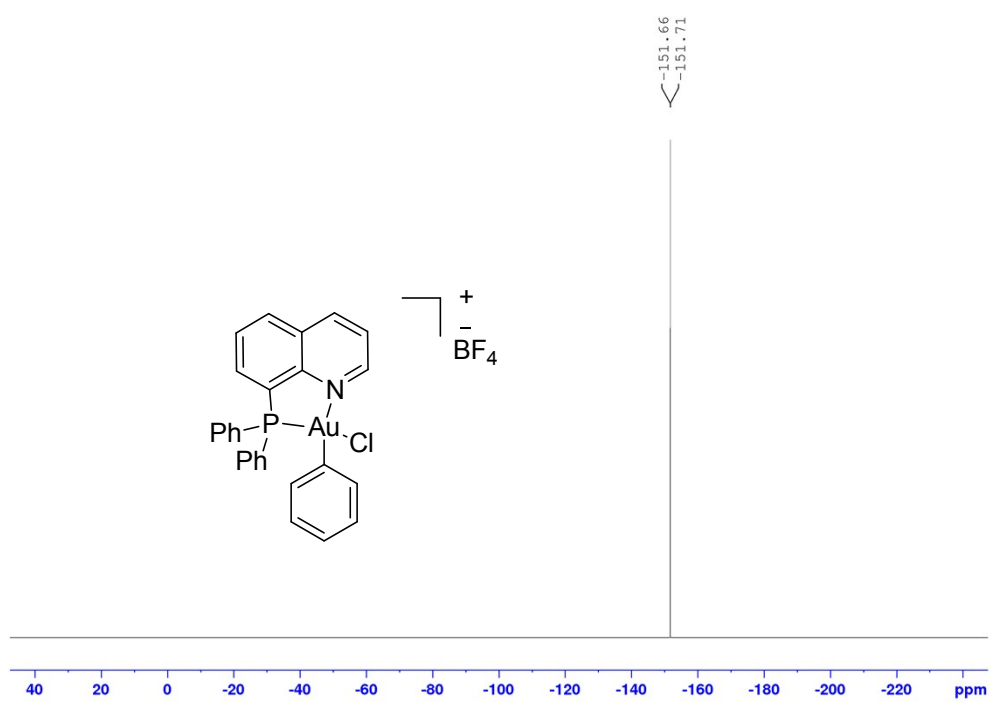

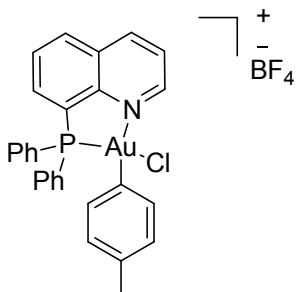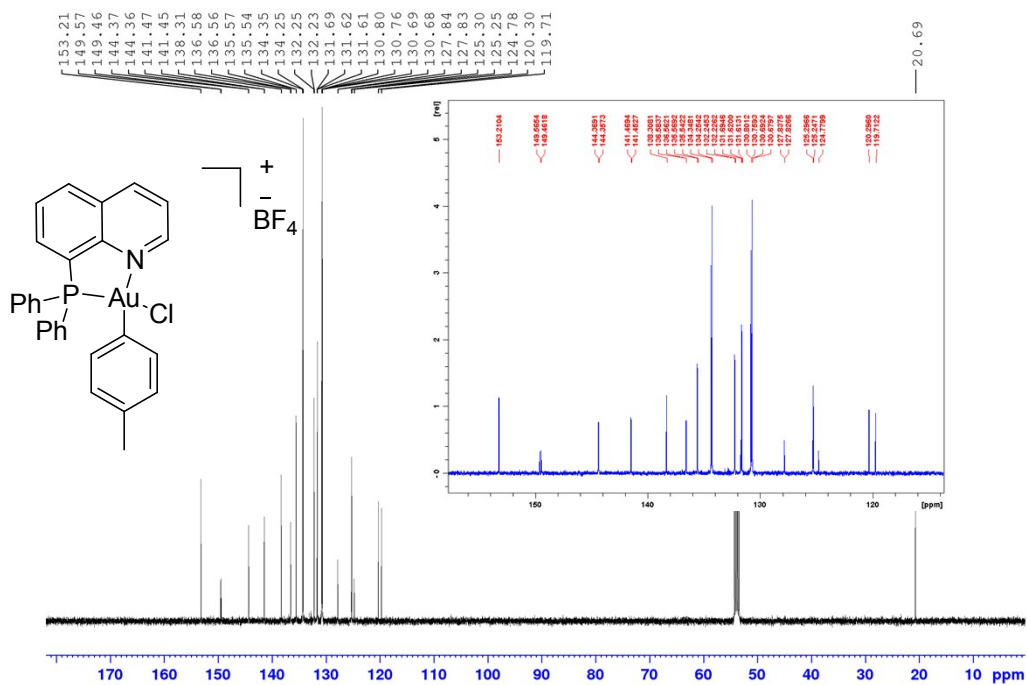

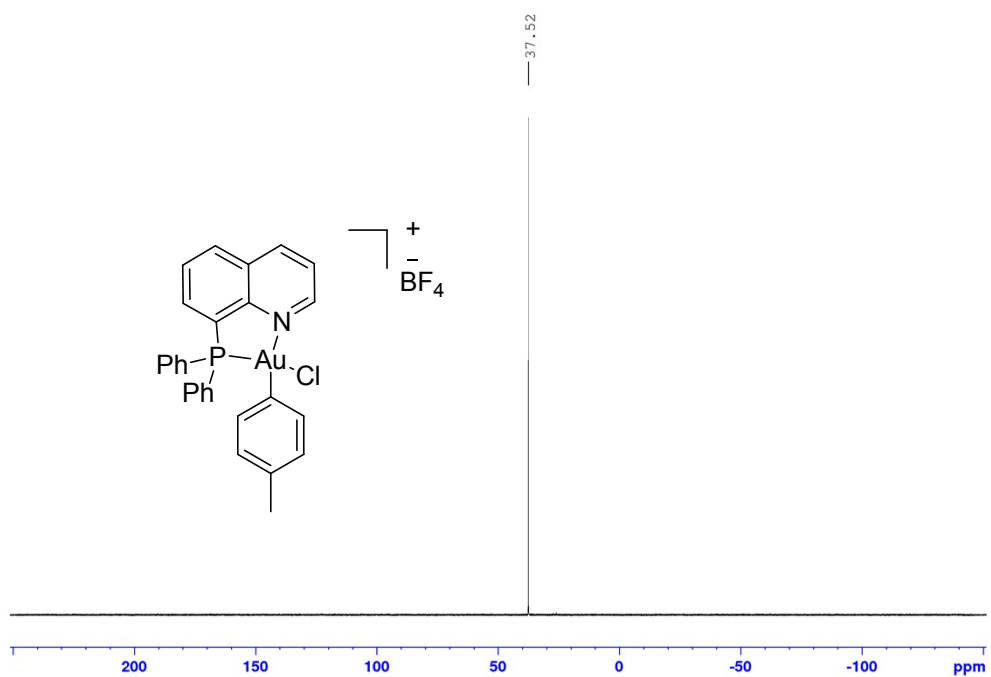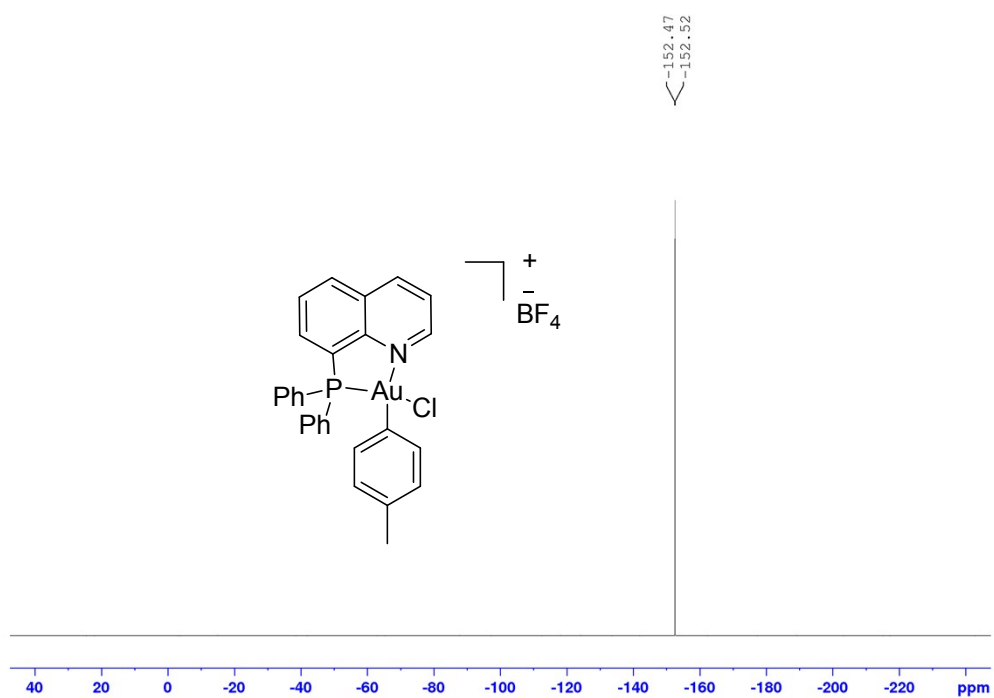

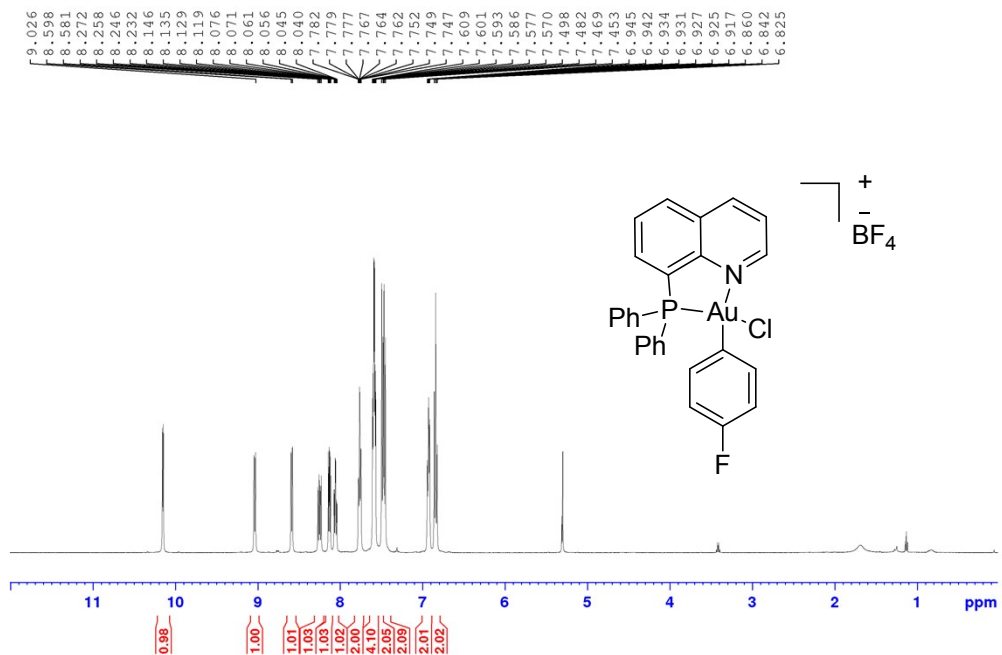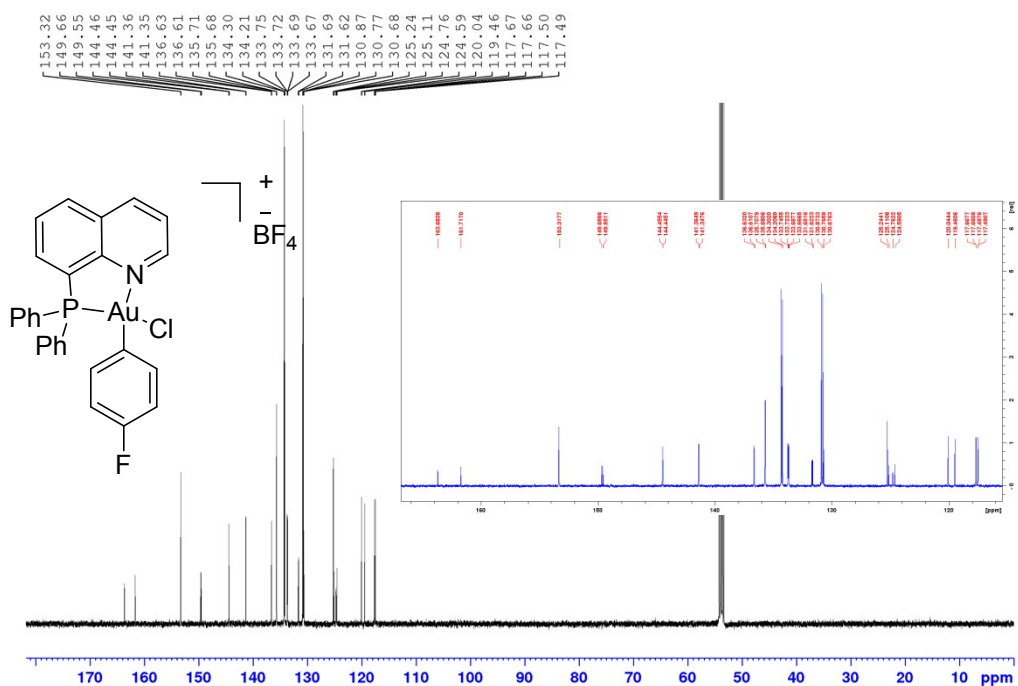

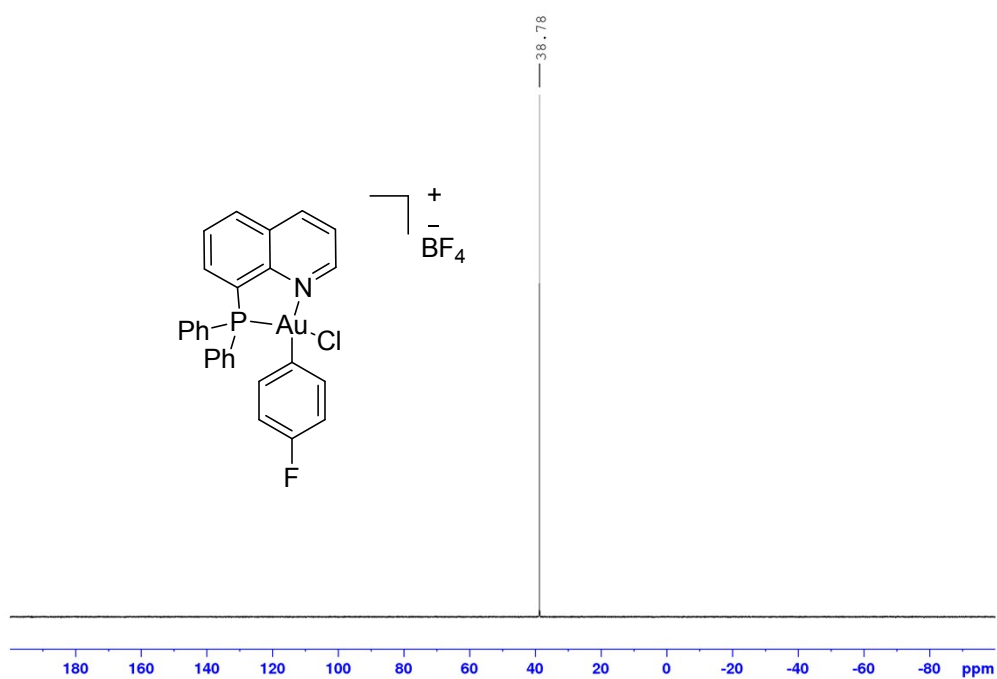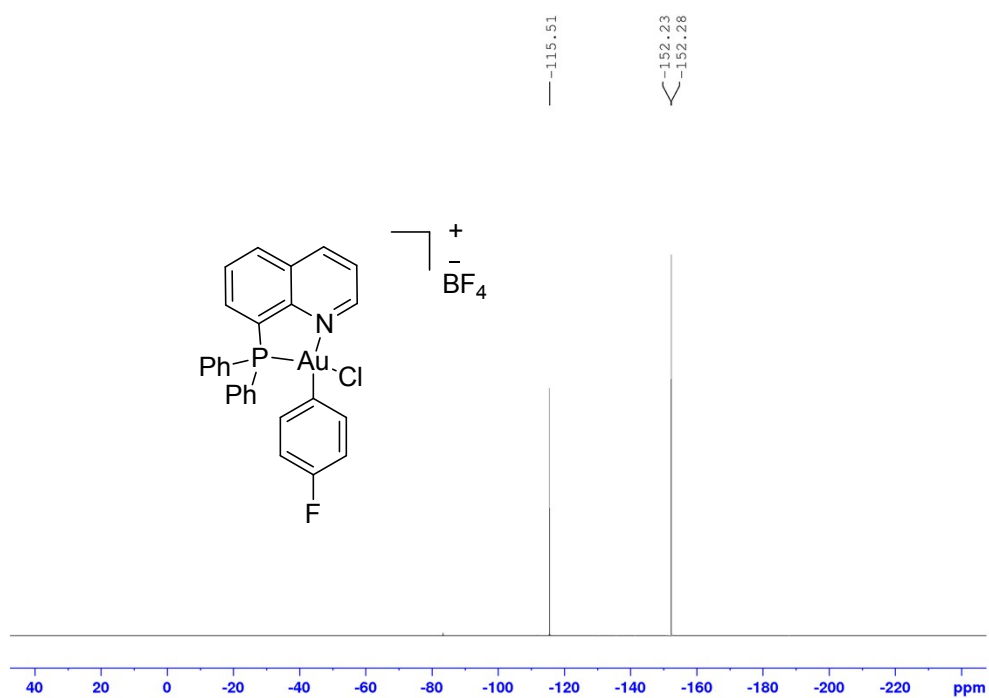

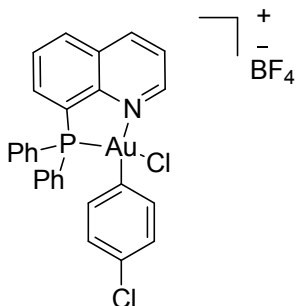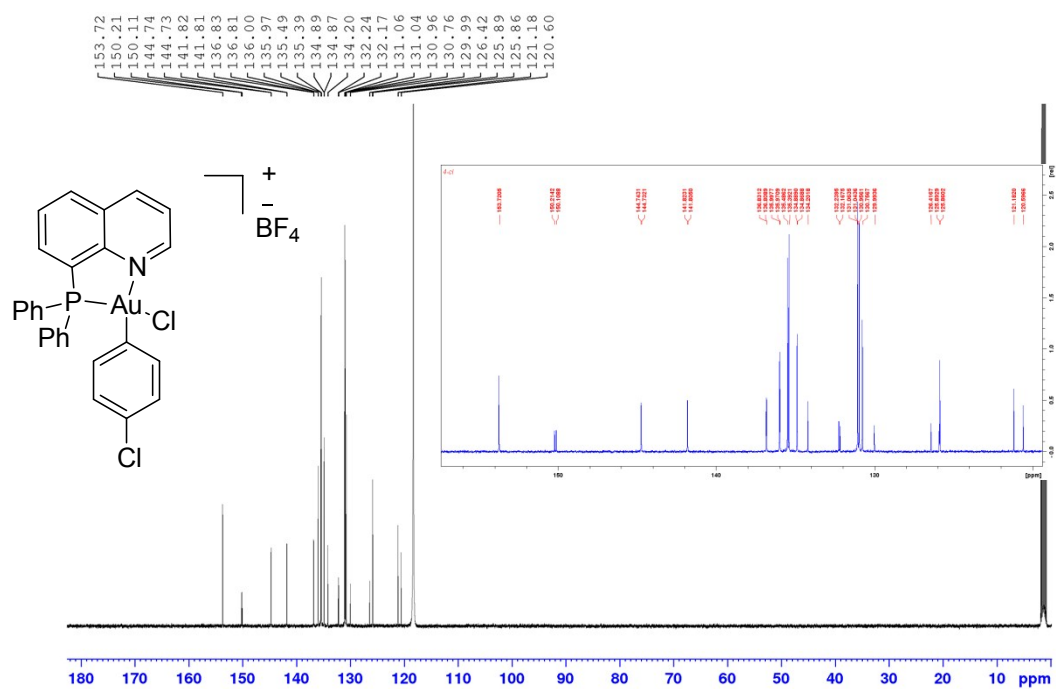

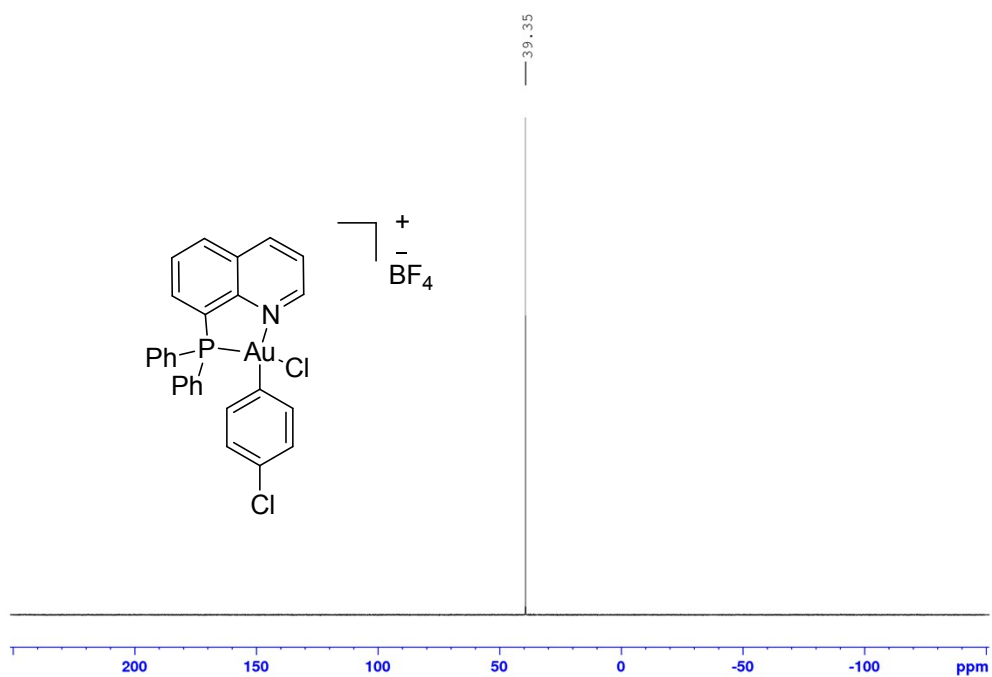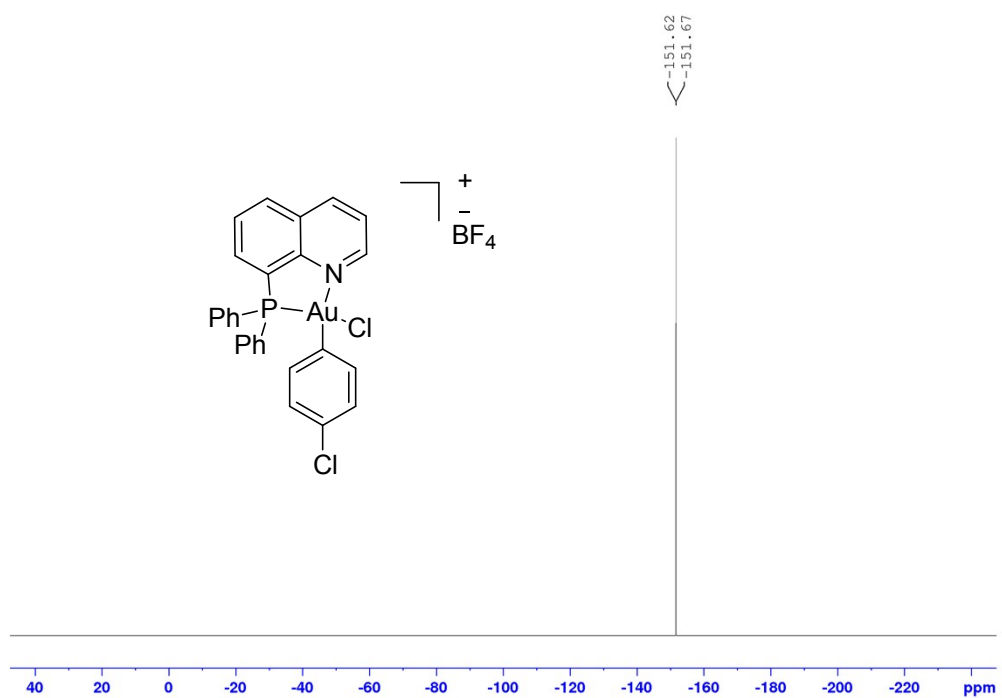



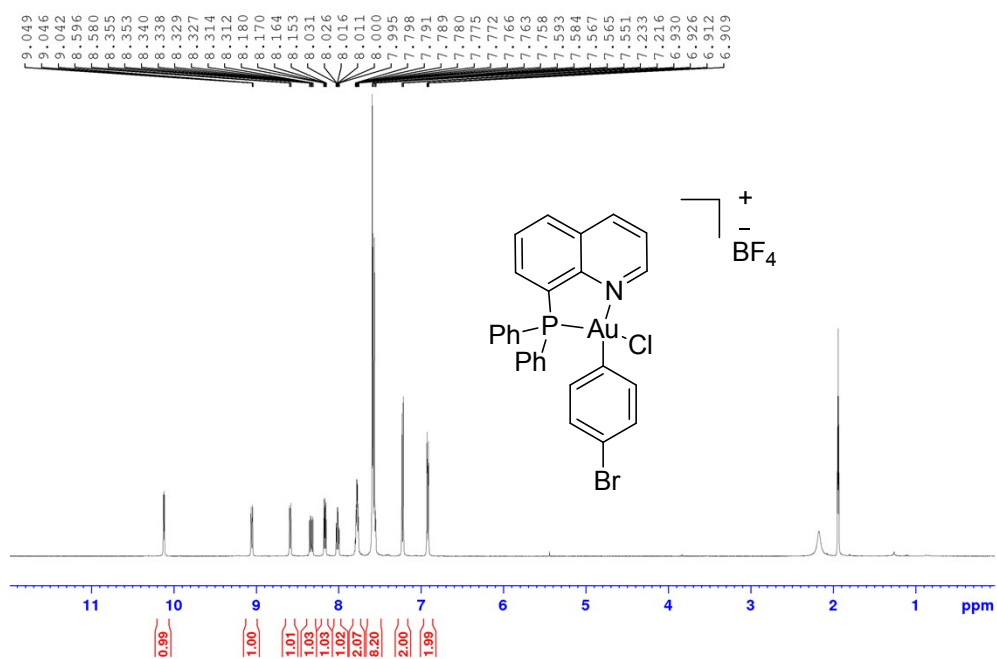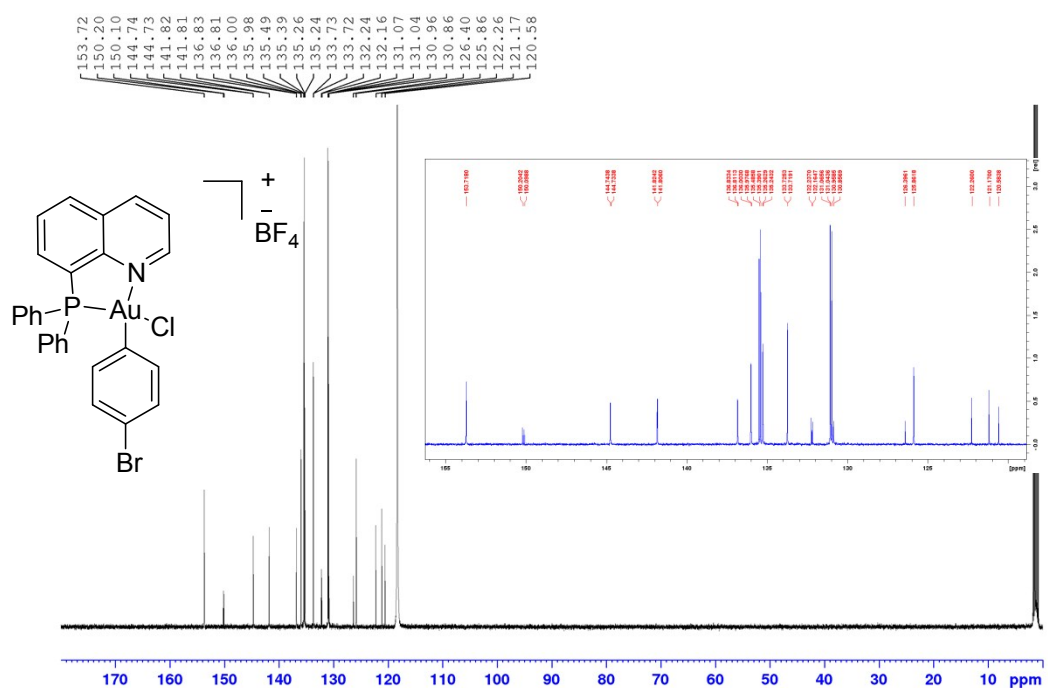

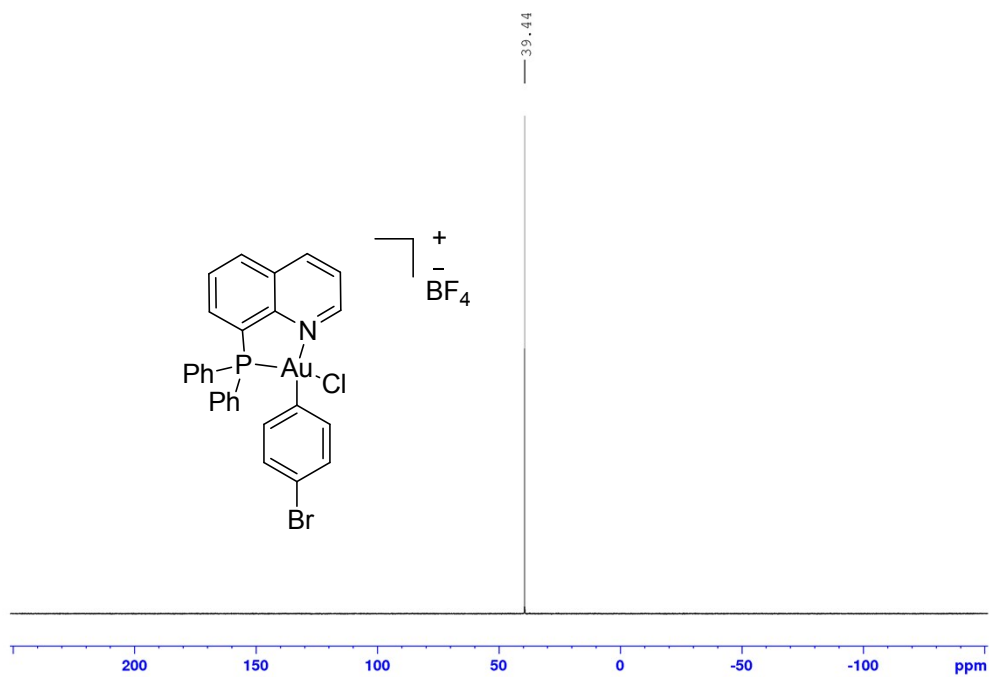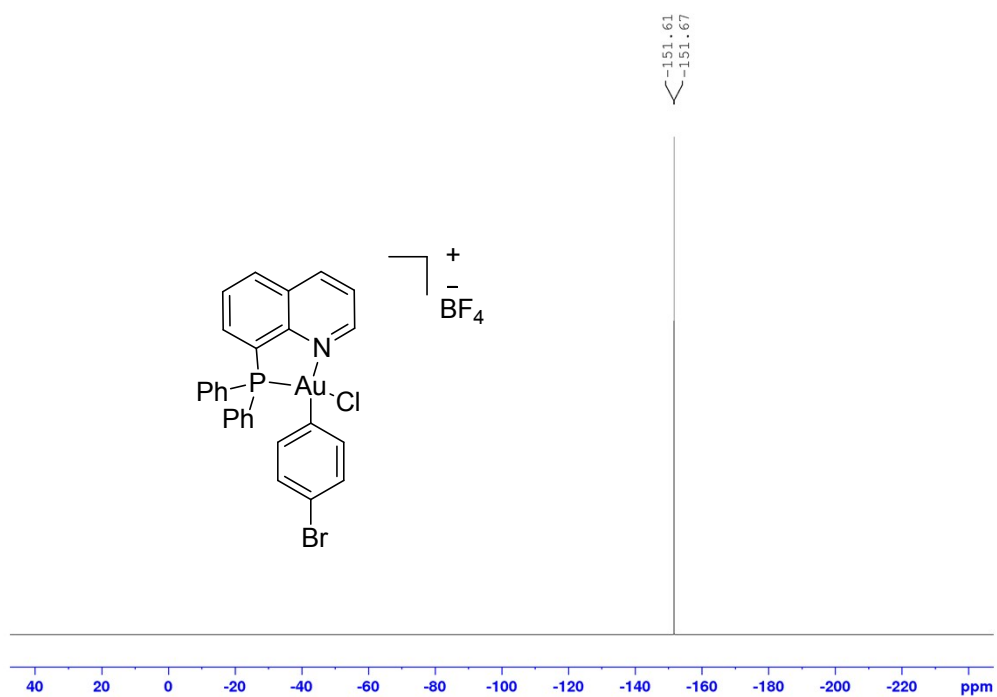

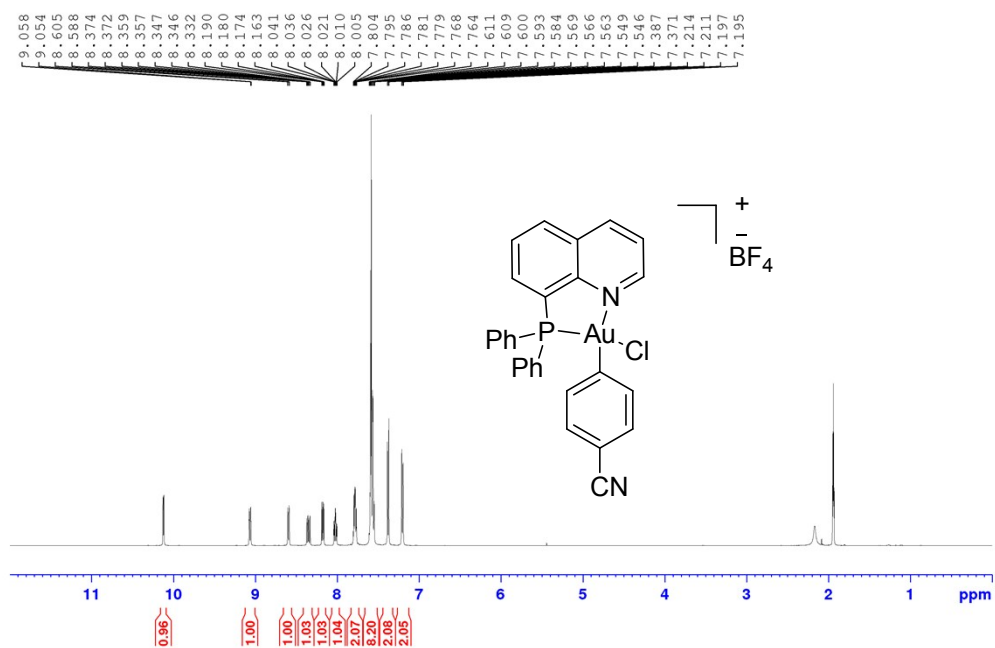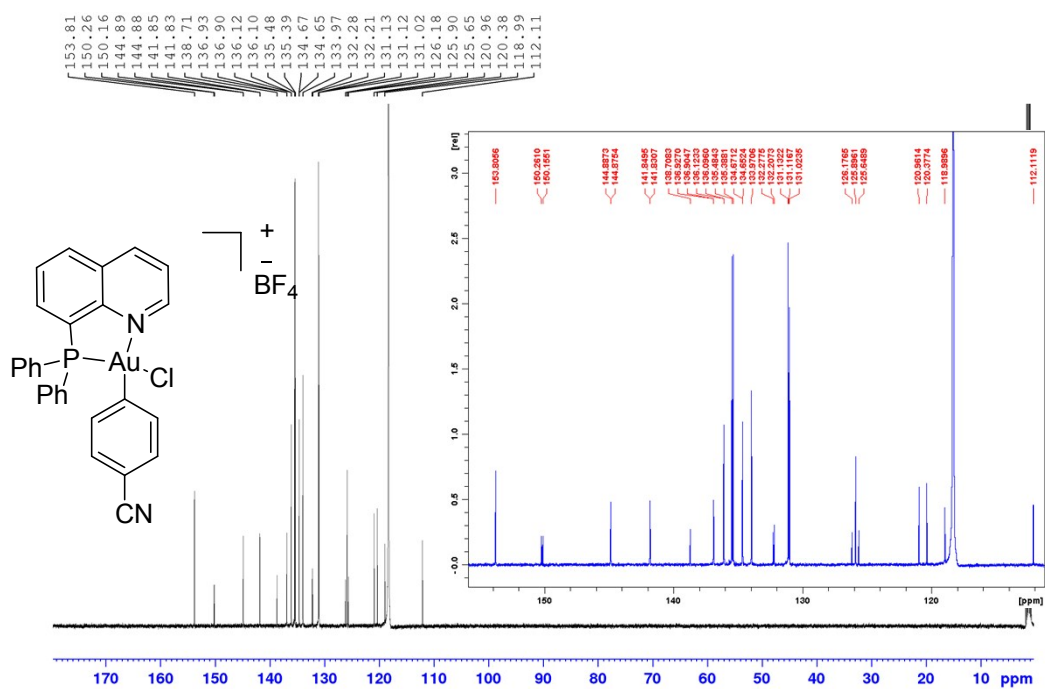

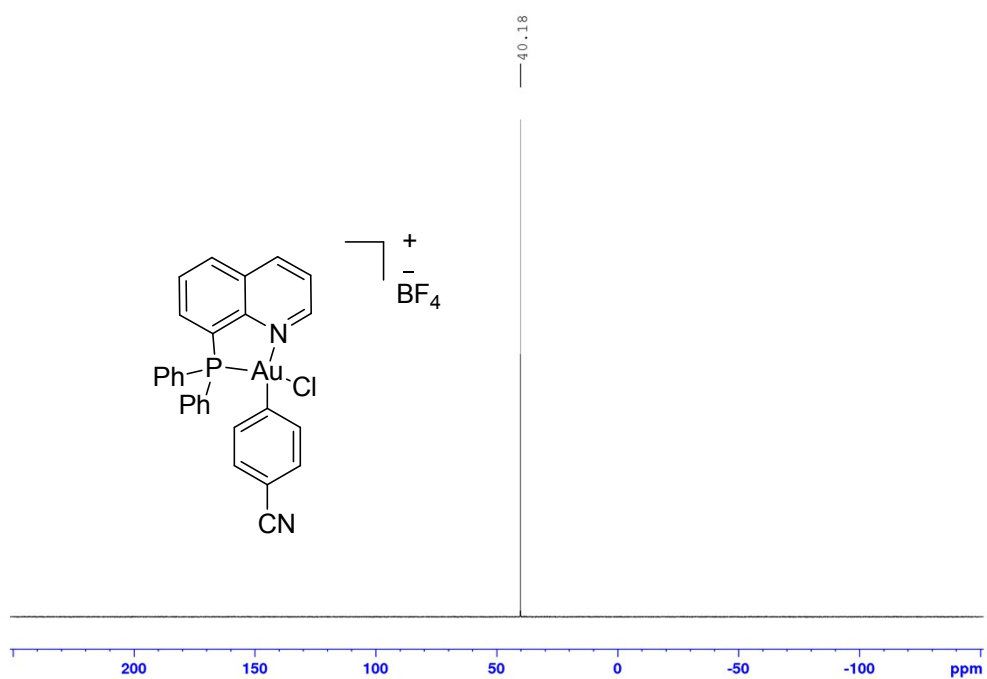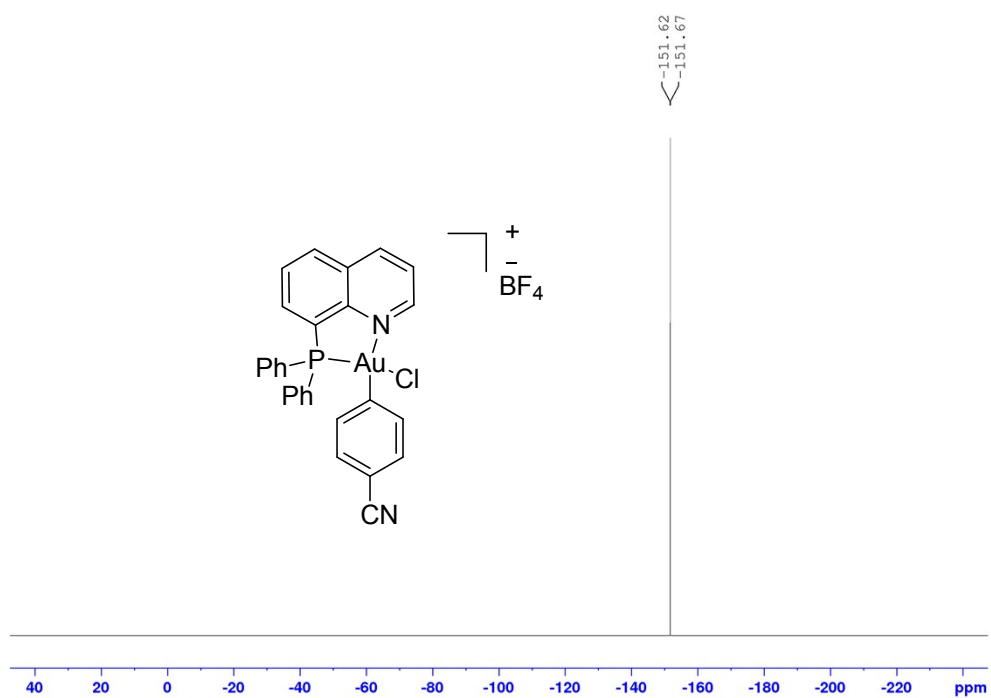

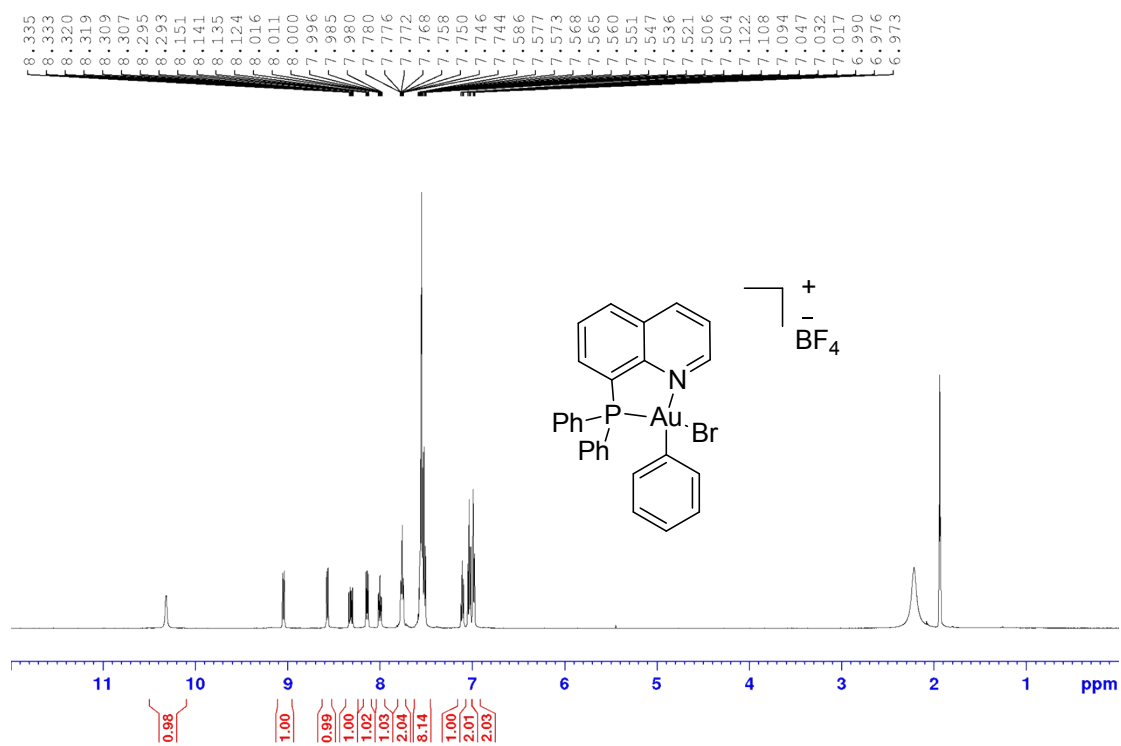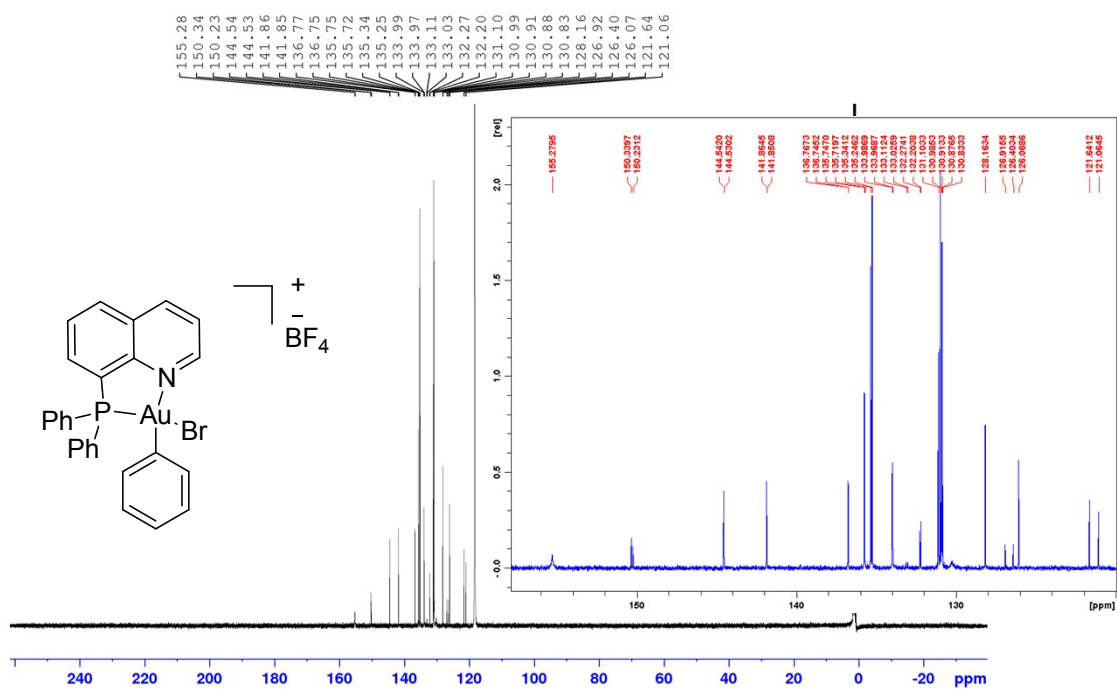

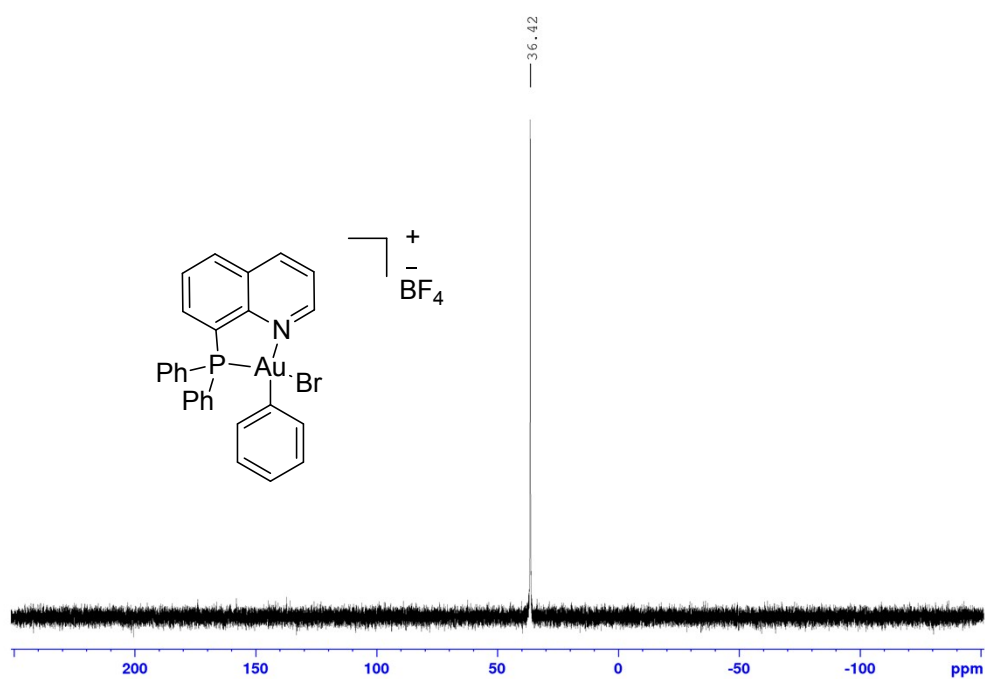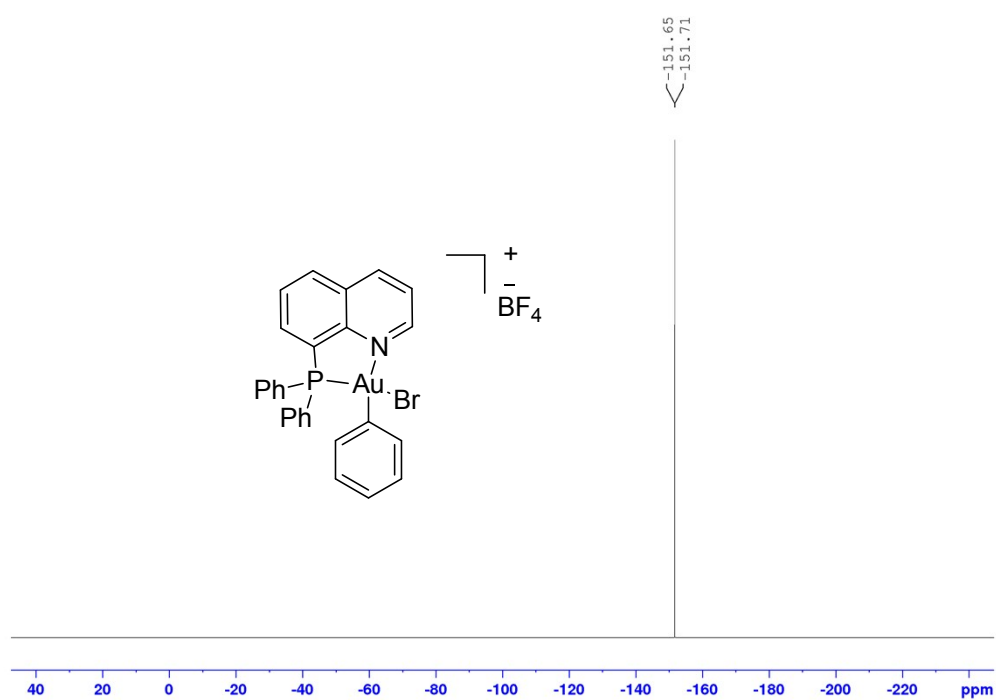

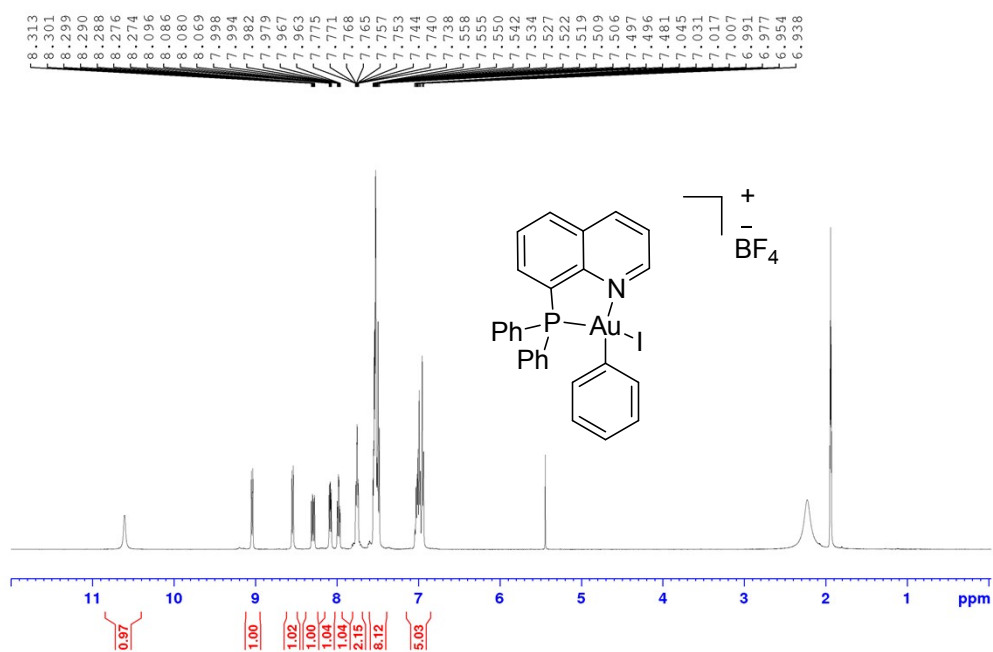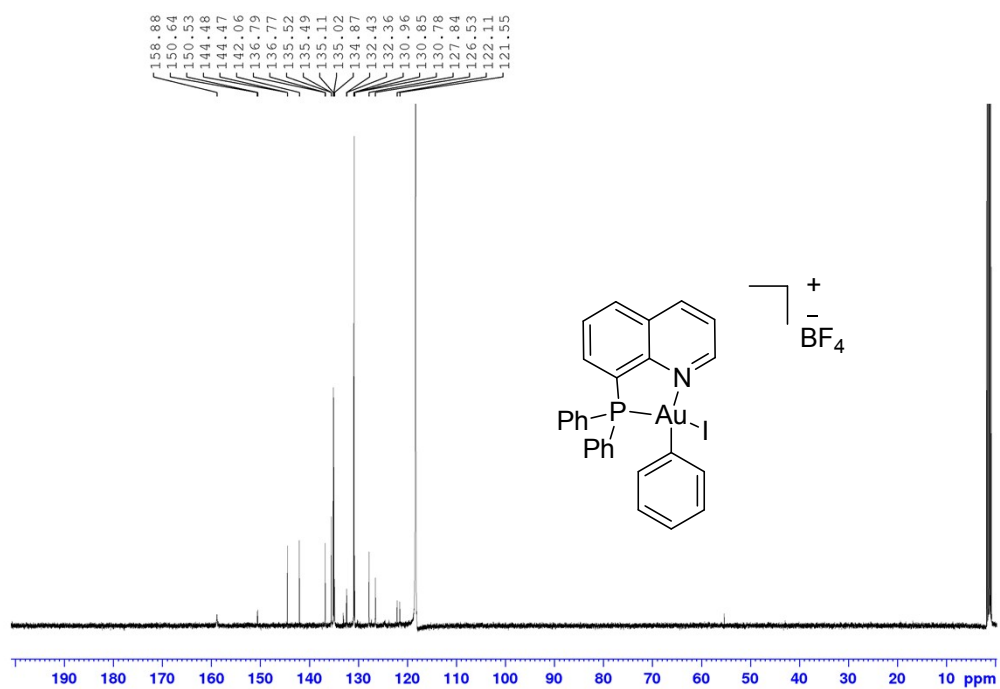

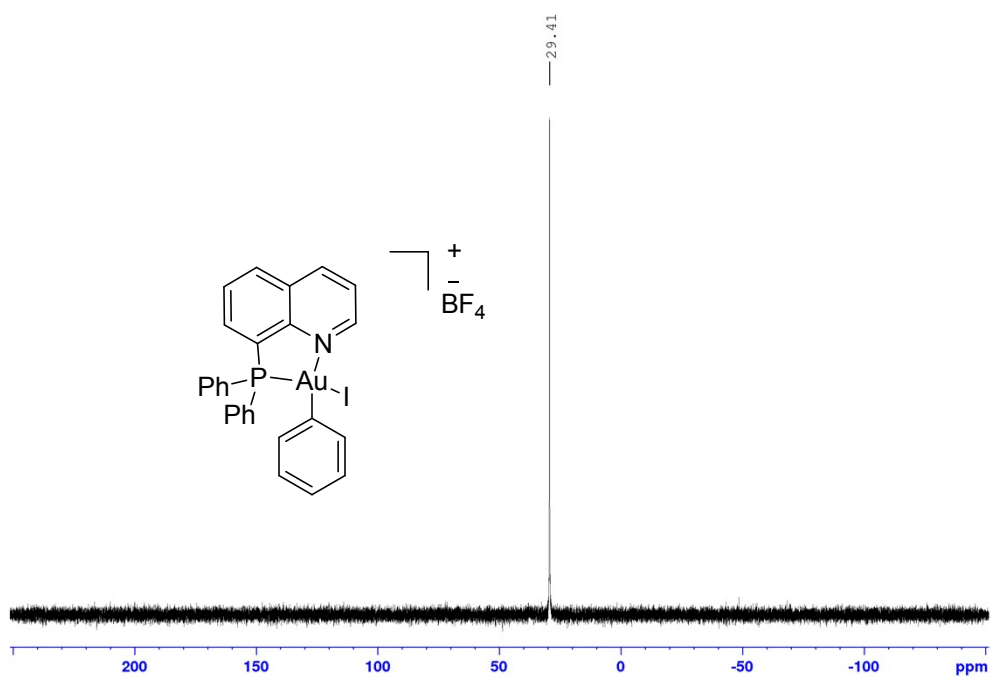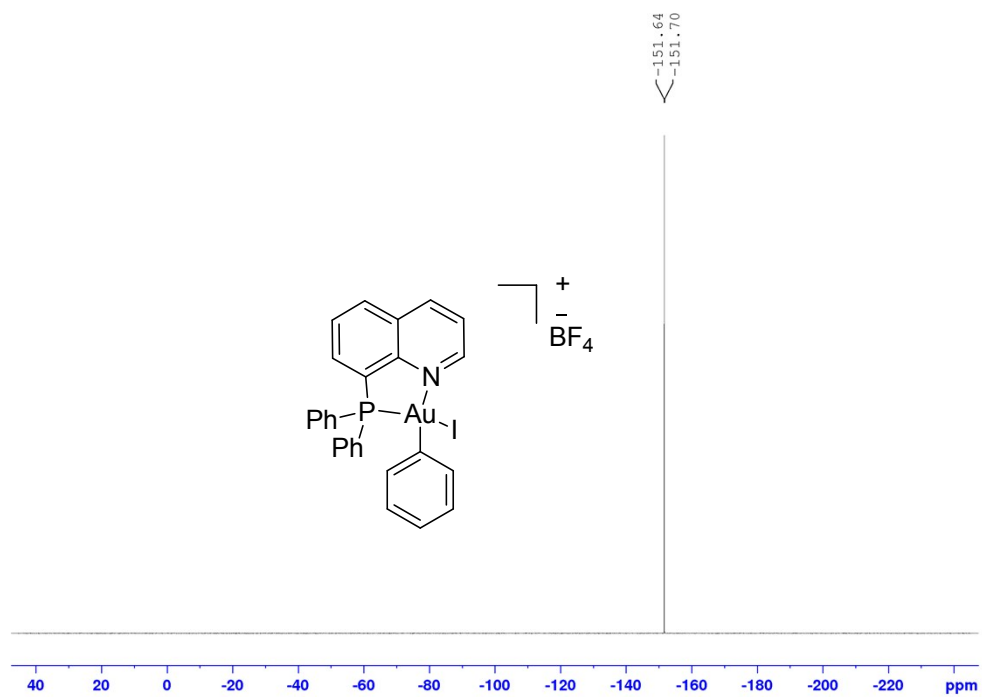



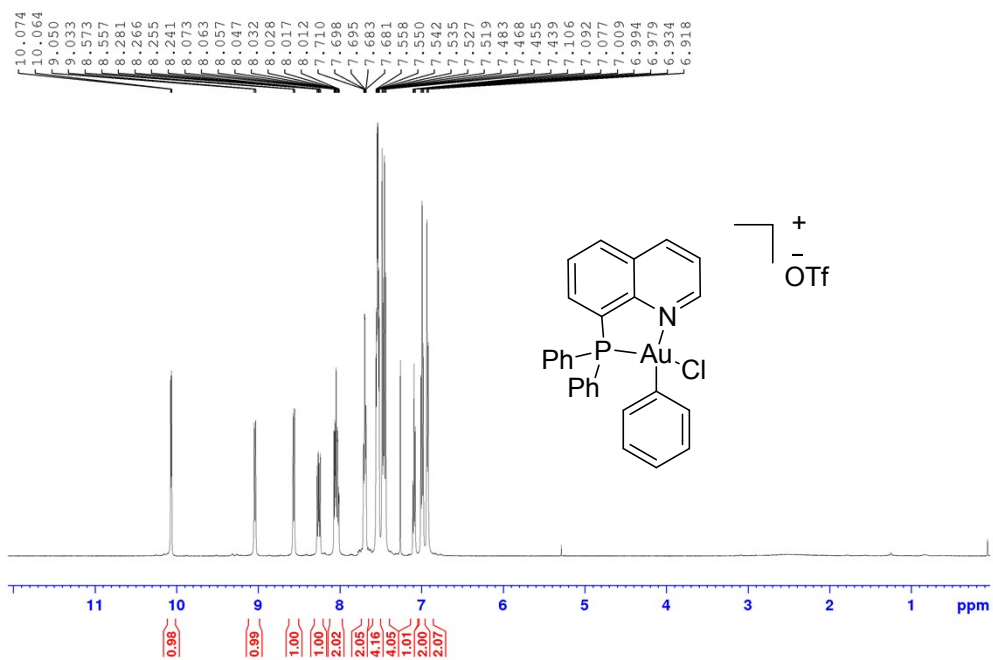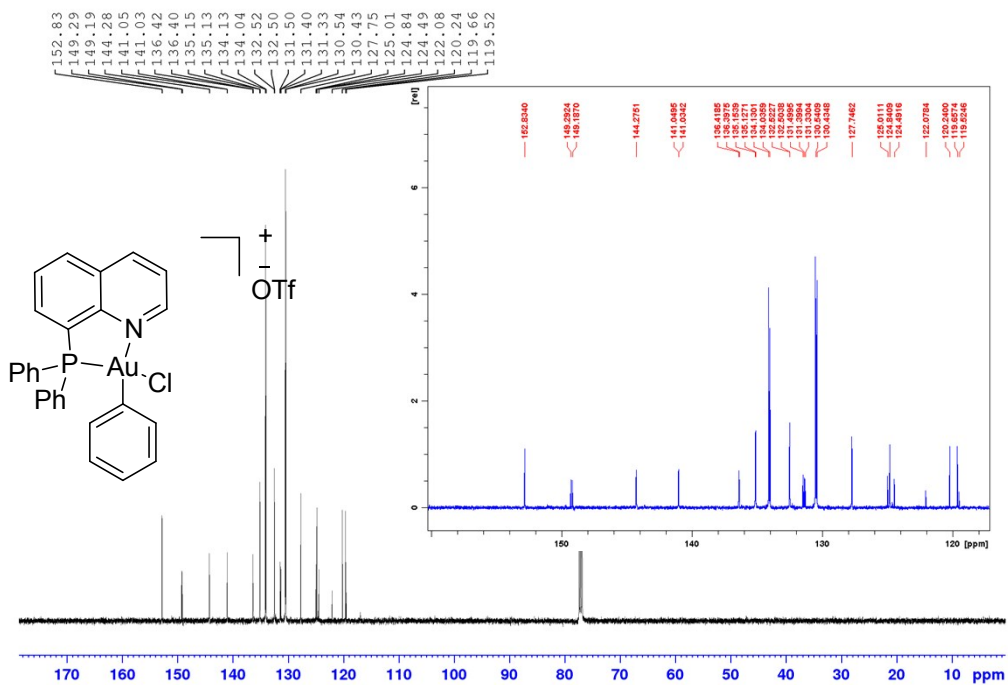

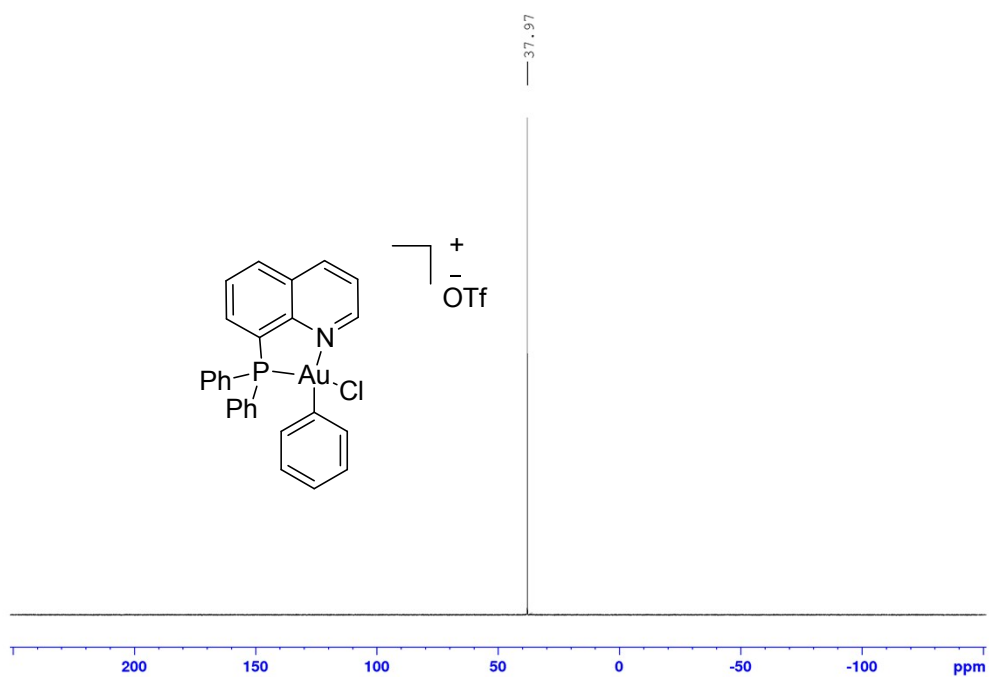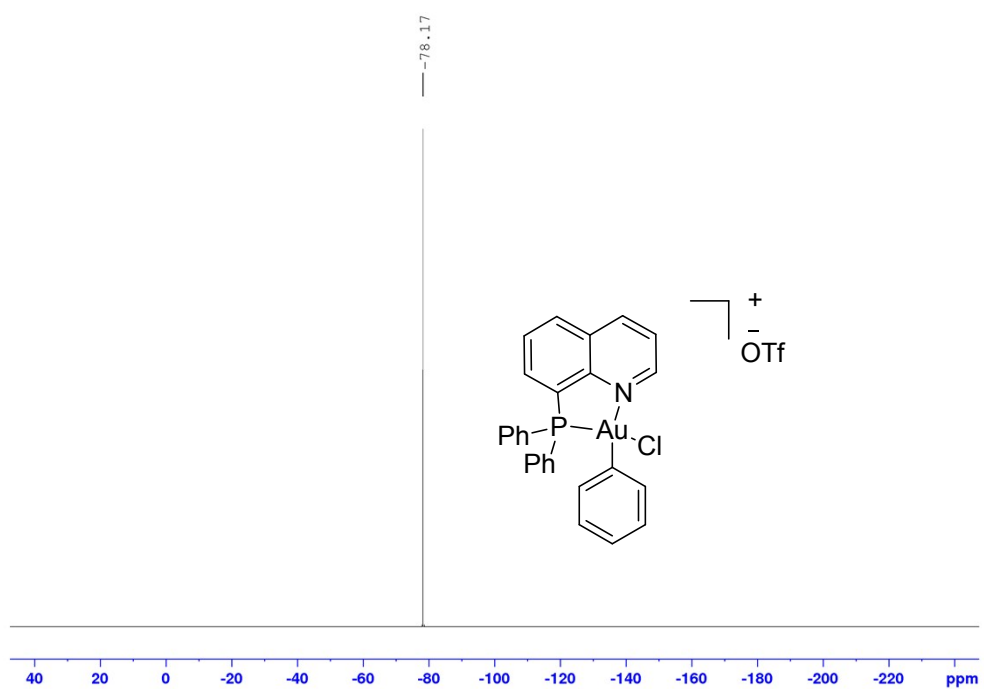

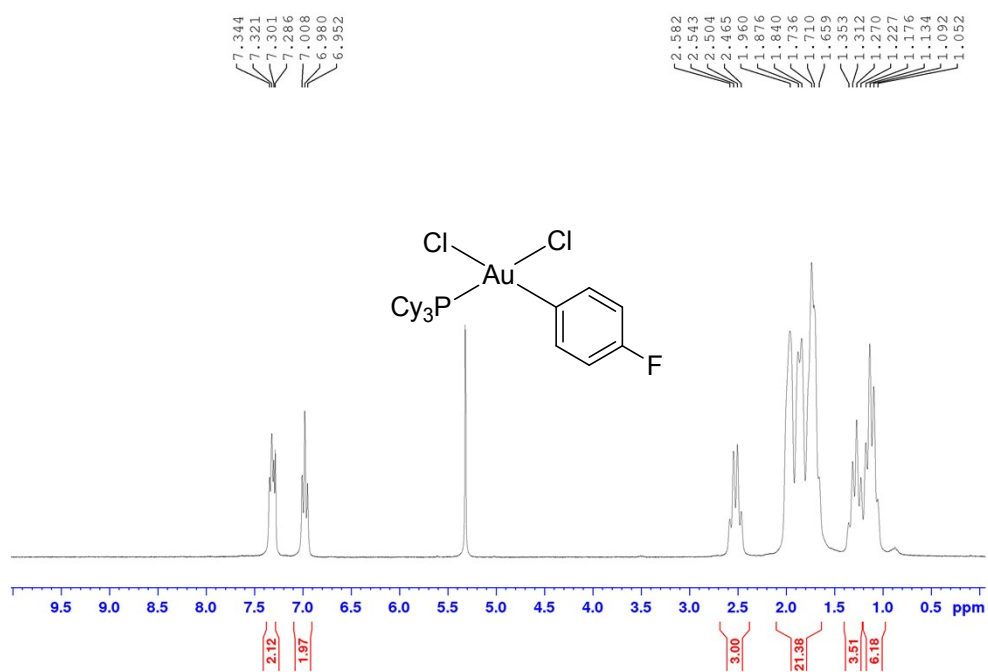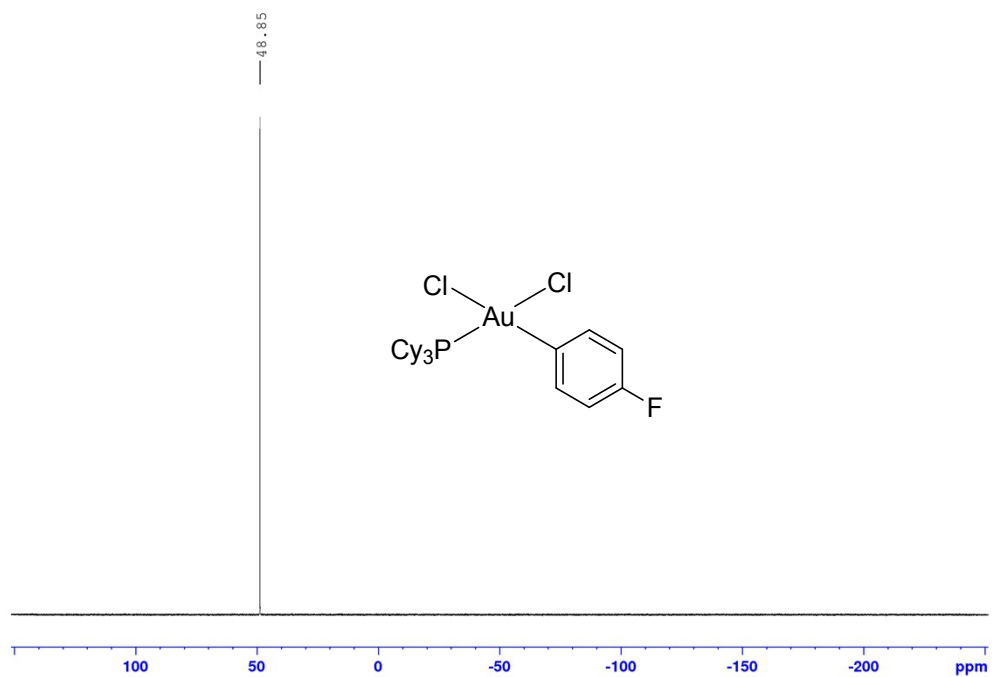

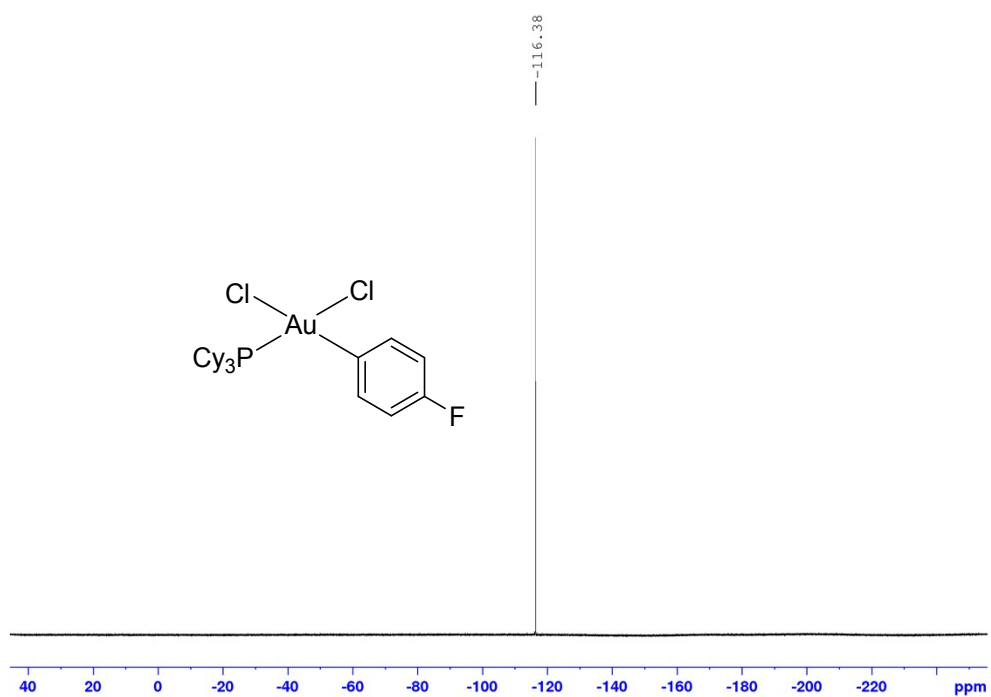

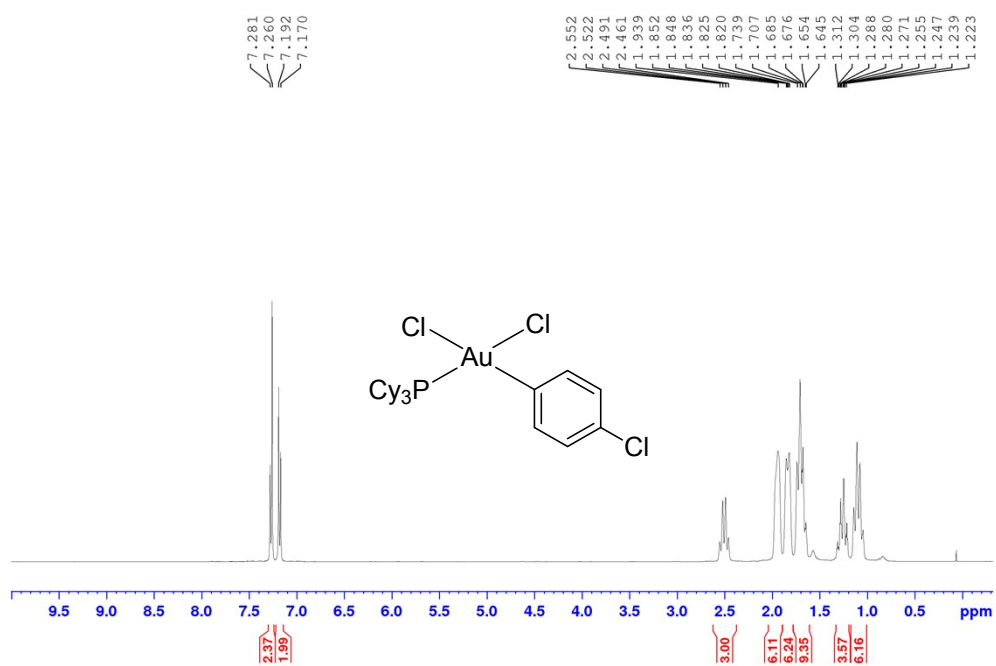

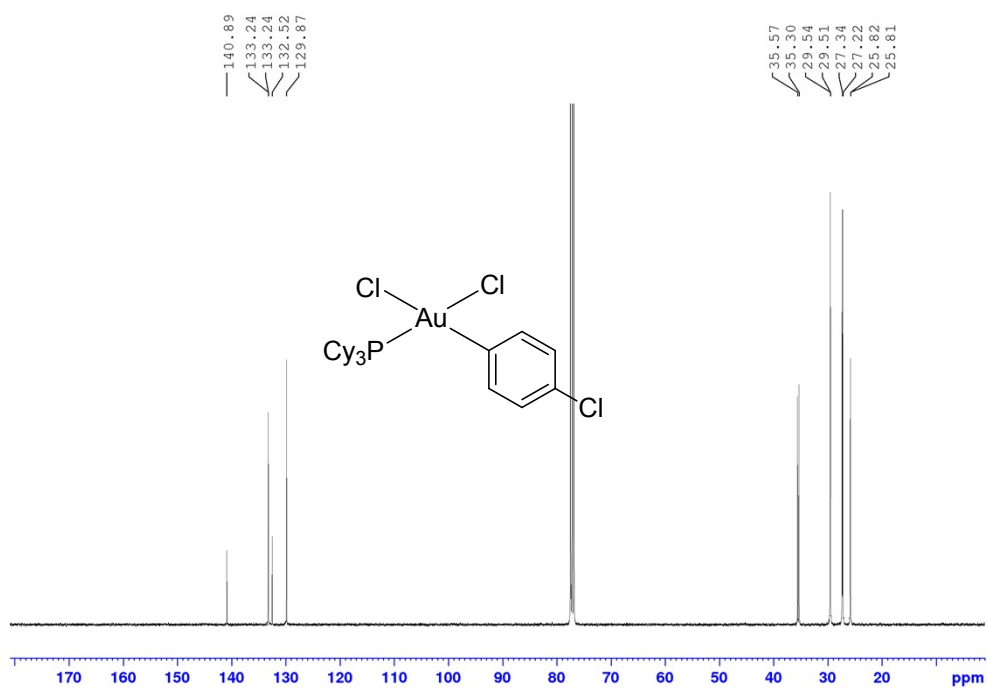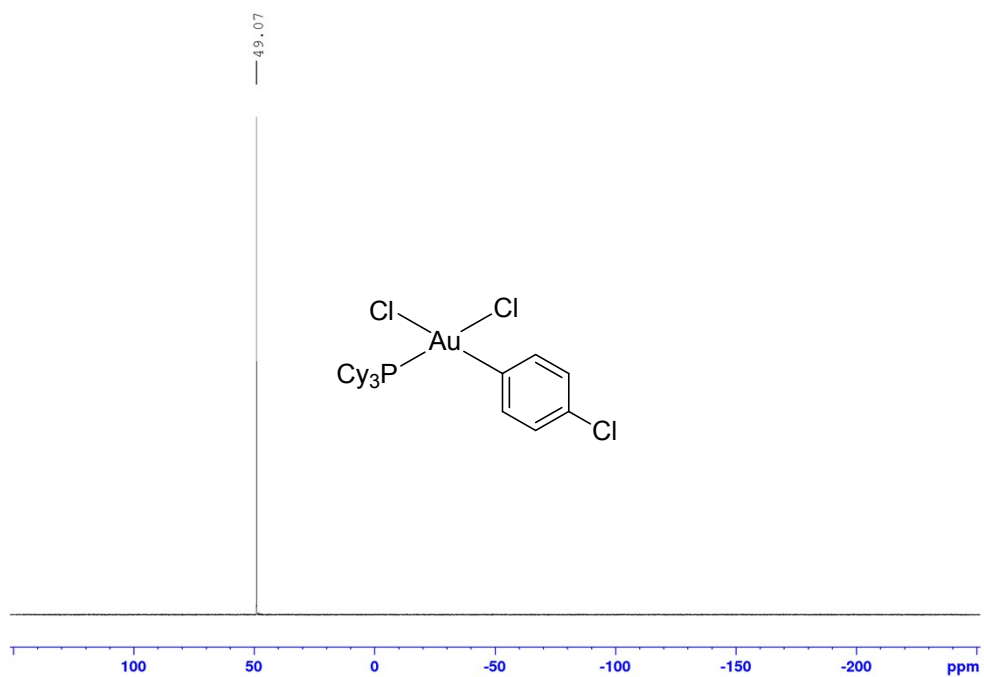

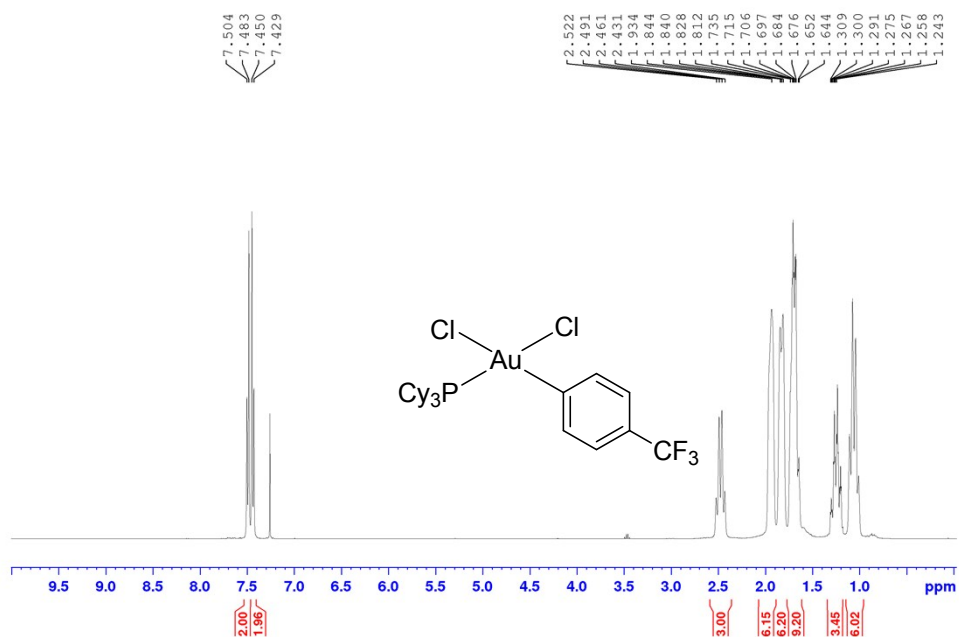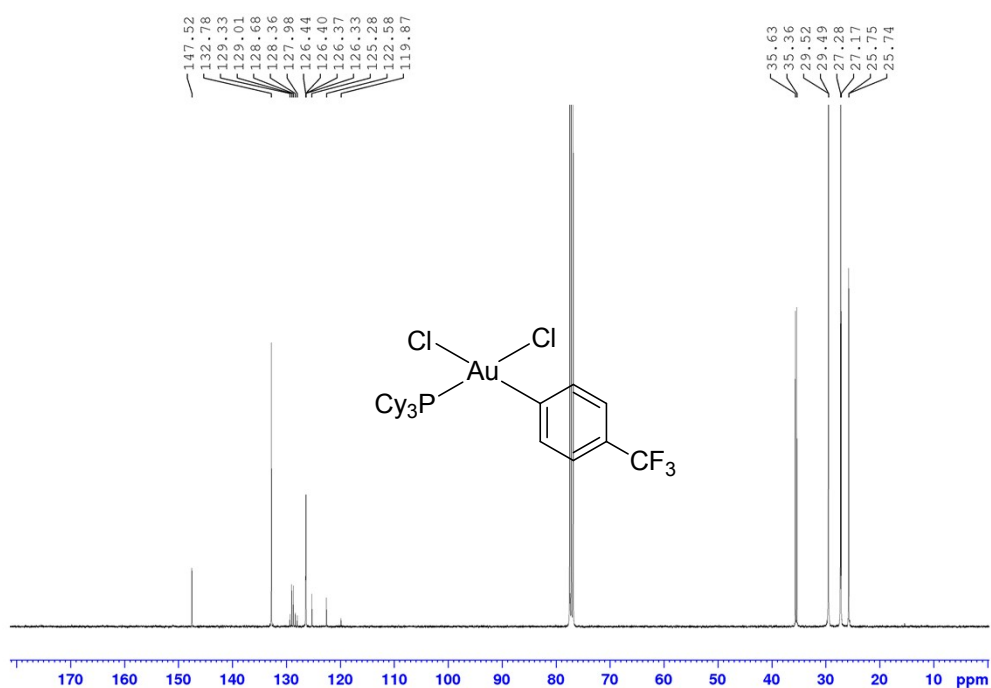

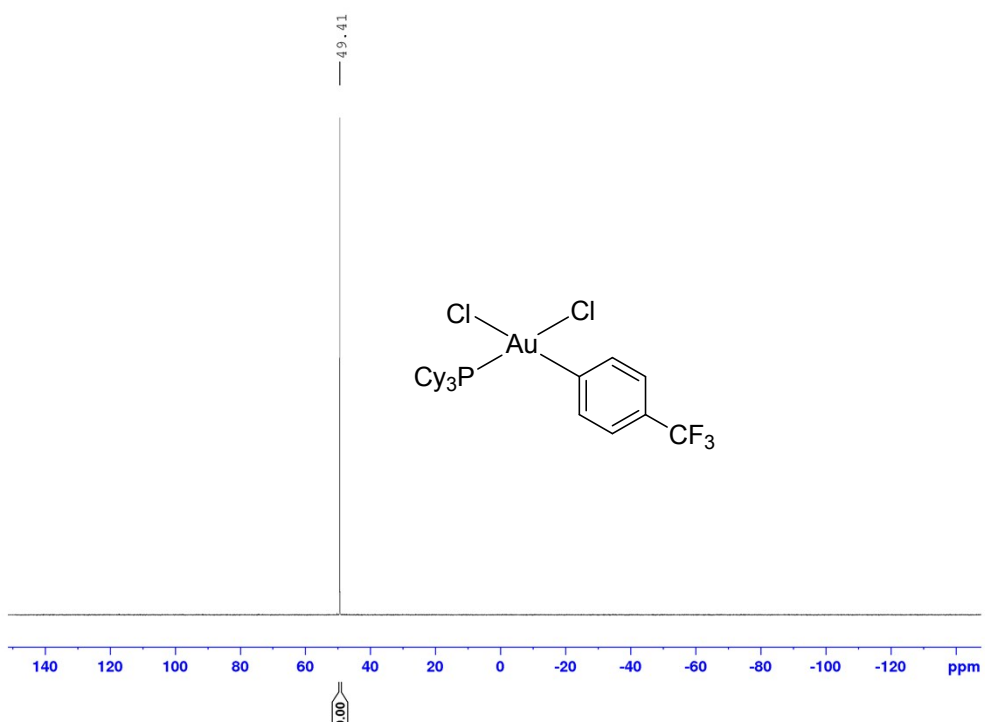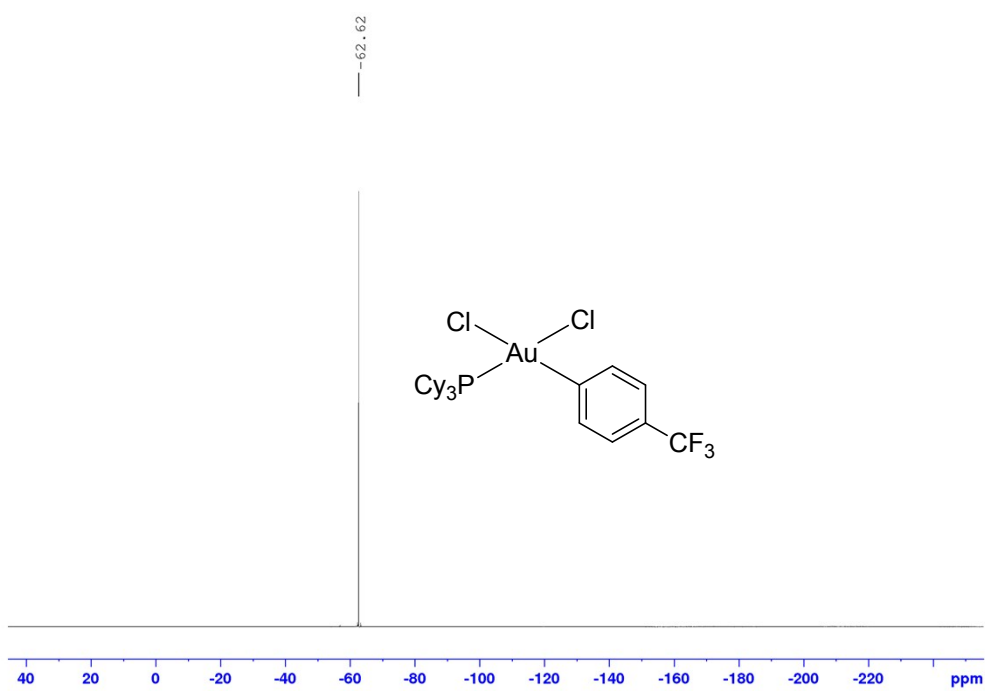



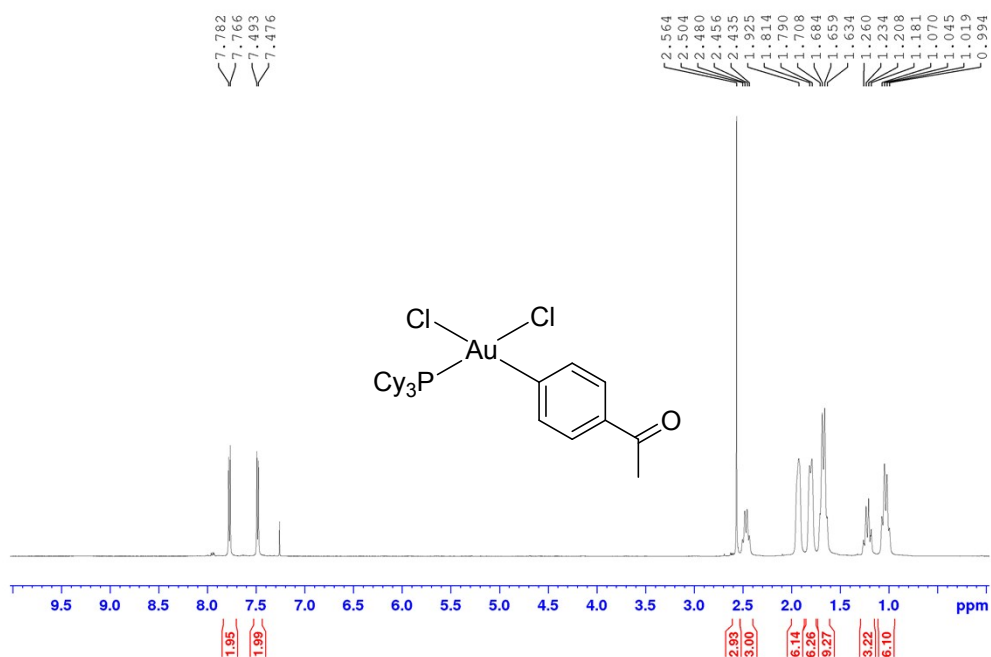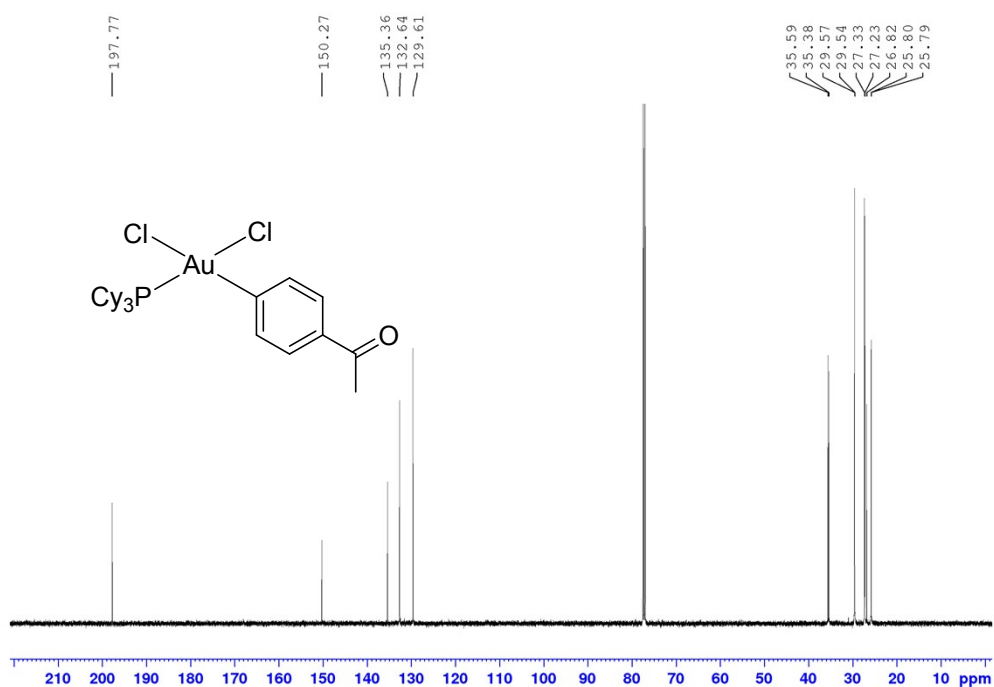

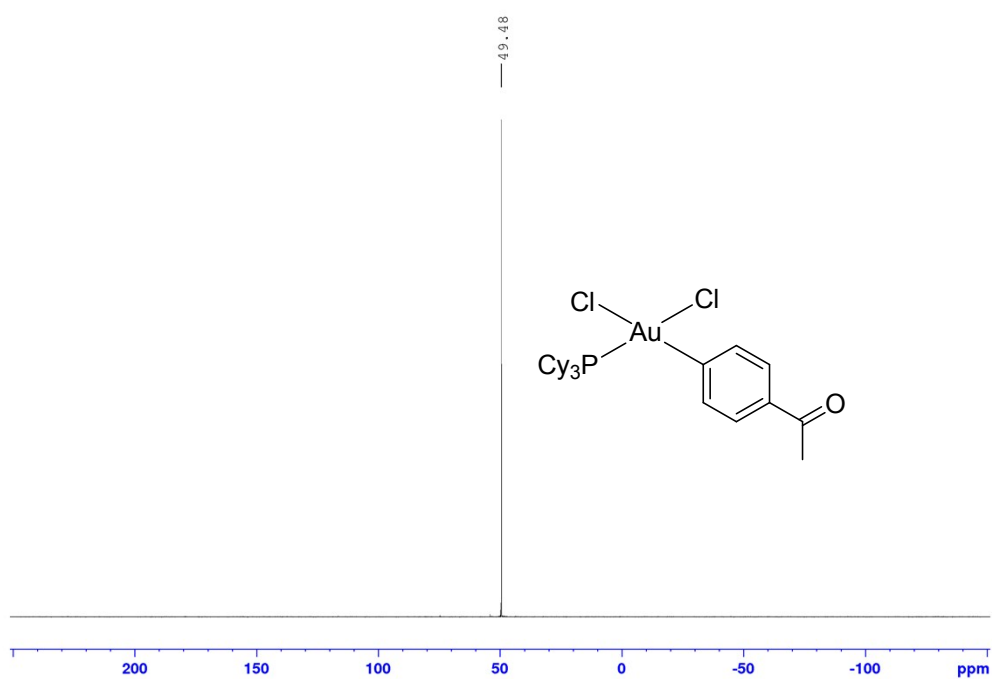

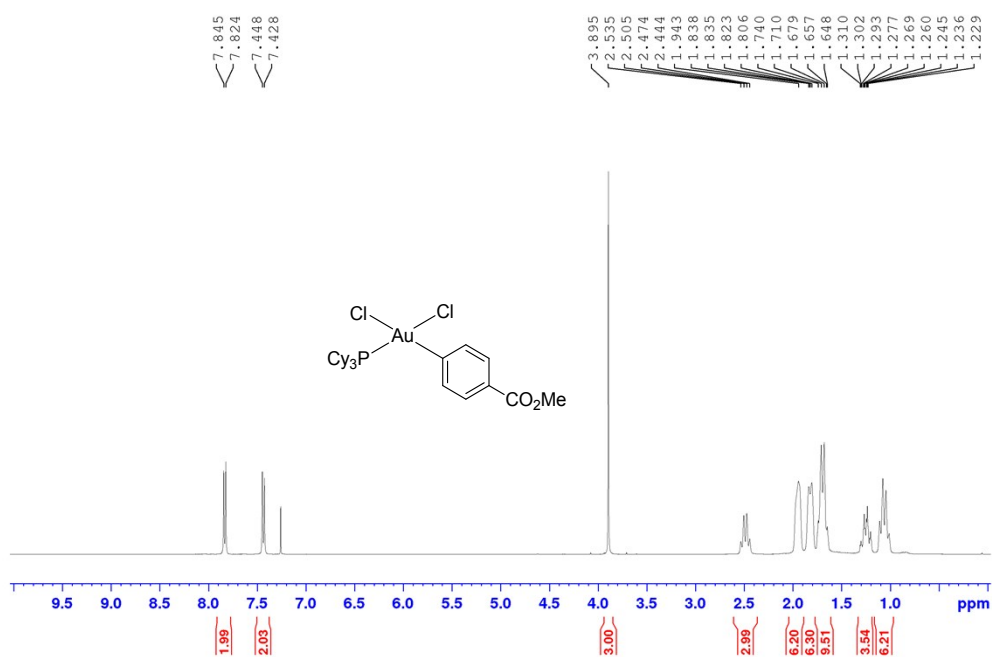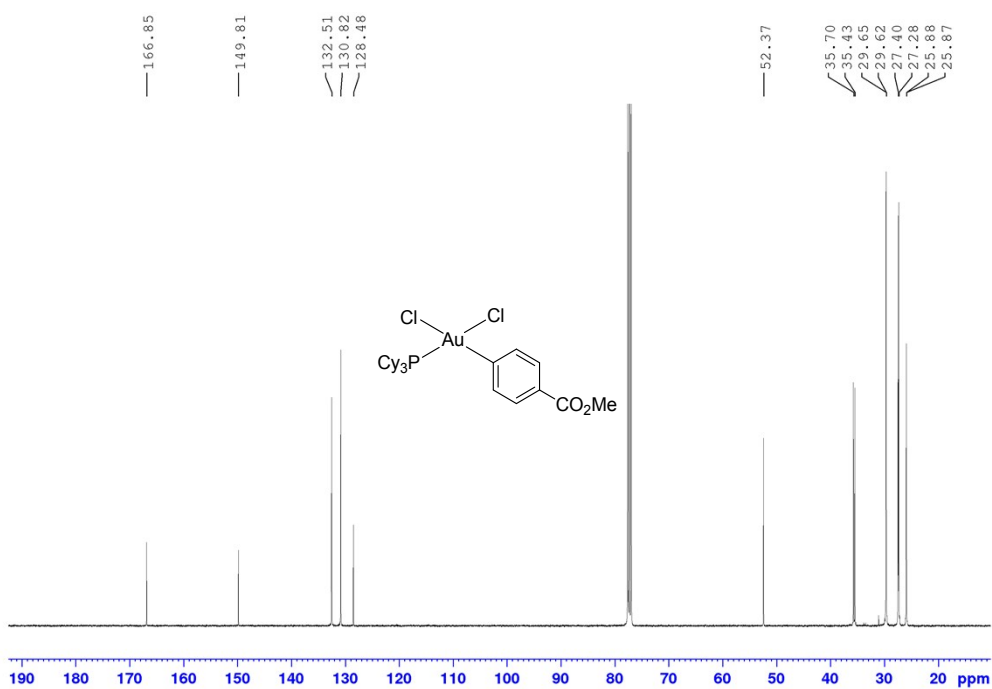

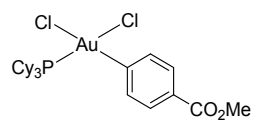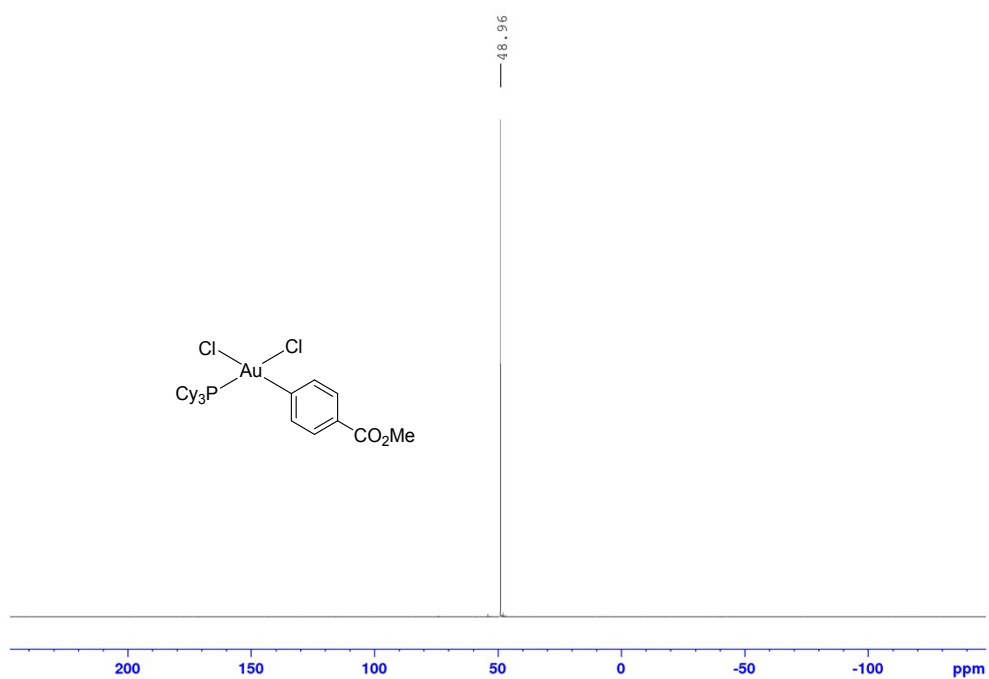

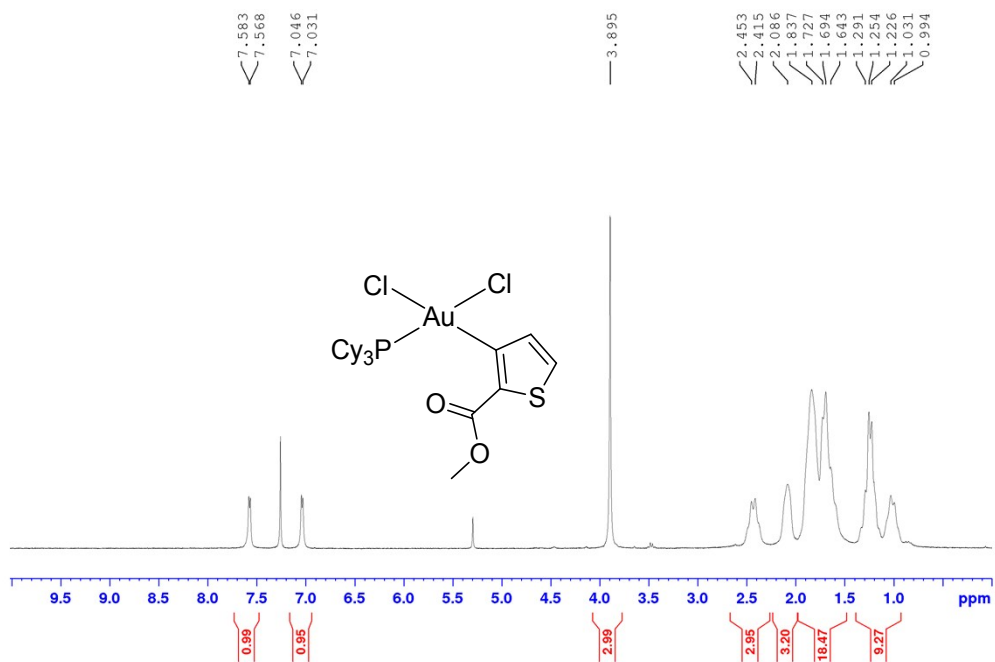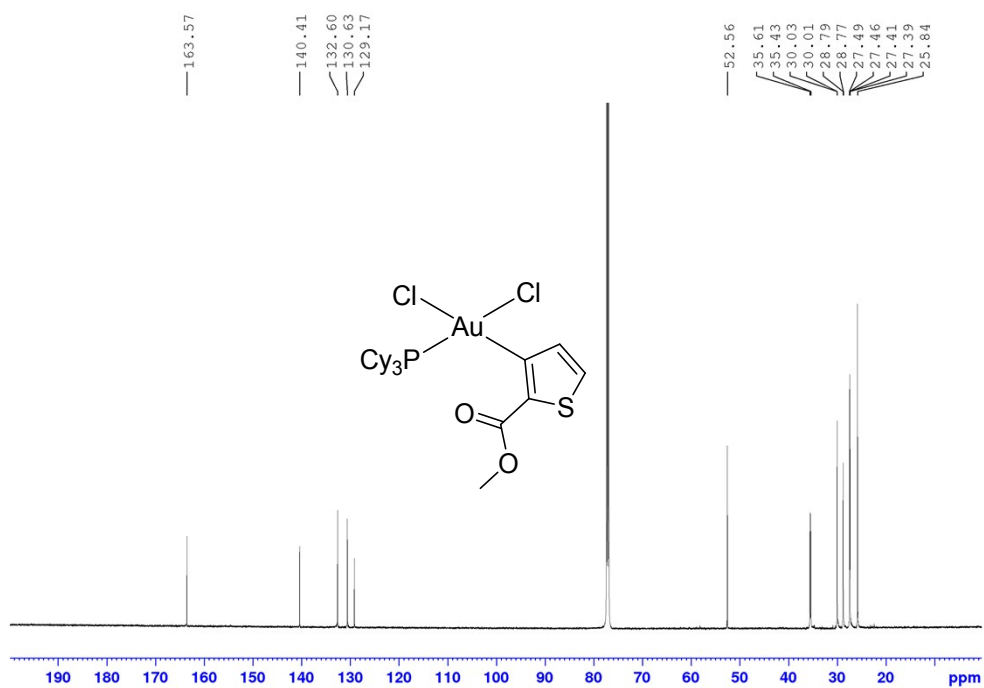

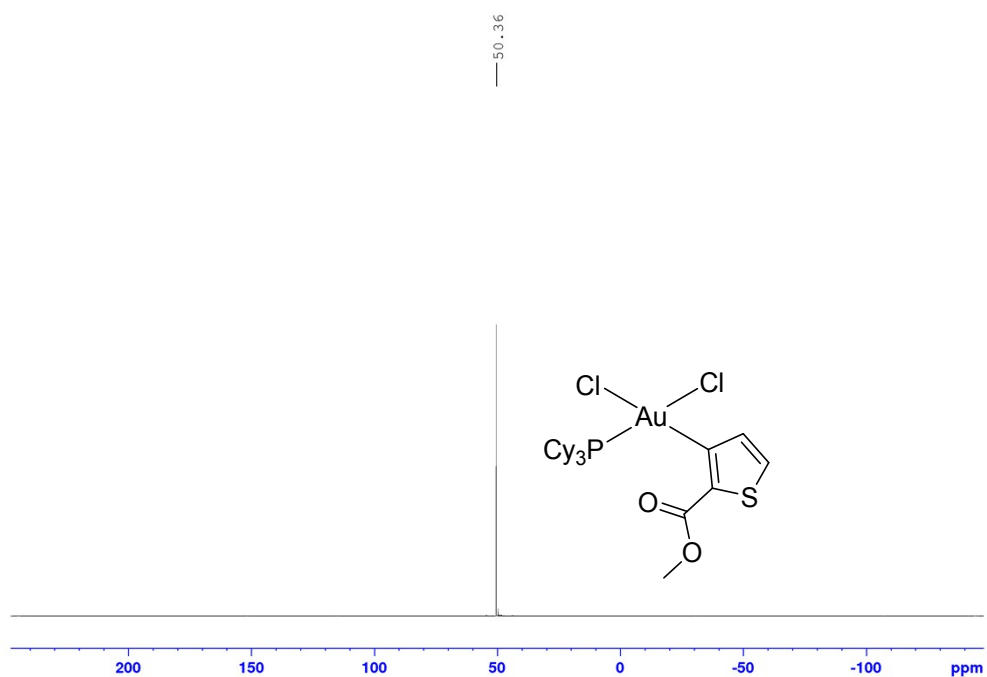

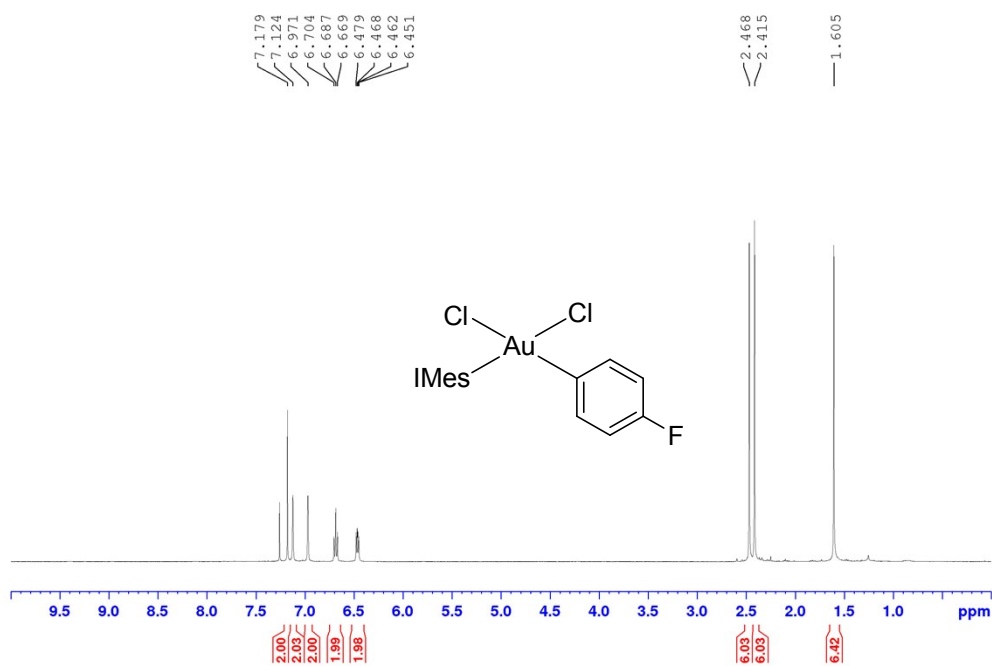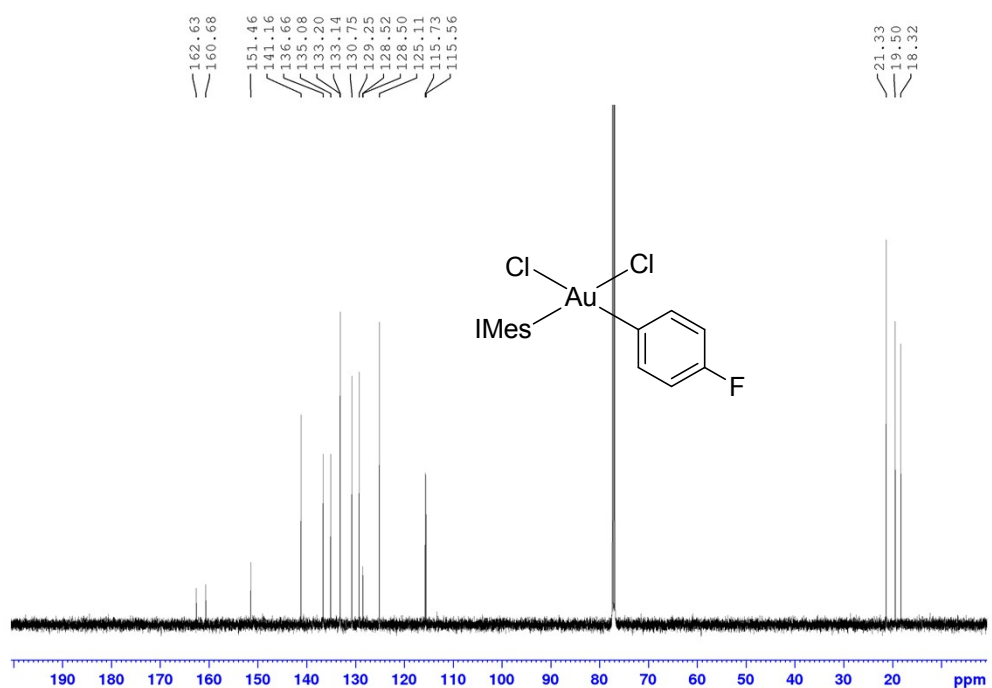

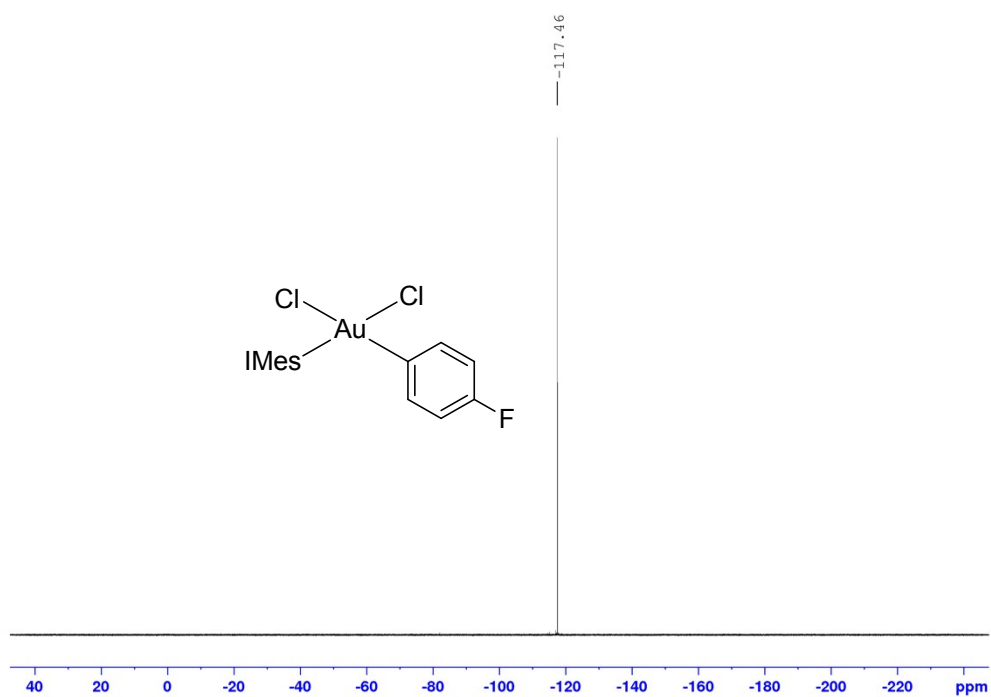

Supplement: c6cc02199a1.pdf [file c6cc02199a1.pdf]
